# Supplementary material for: A comparative analysis of important public clinical trial registries, and a proposal for an interim ideal one
Source: PubMed Central journal article supplement (PMC8112656; doi:10.1371/journal.pone.0251191), 2021-05-11
Supplement: pone.0251191.s008.pdf [file pone.0251191.s008.pdf]

# PLOS ONE

## A comparative analysis of important public clinical trial registries, and a proposal for an interim ideal one --Manuscript Draft--

|                               |                                                                                                                                                                                                                                                                                                                                                                                                                                                                                                                                                                                                                                                                                                                                                                                                                                                                                                                                                                                                                                                                                                                                                                                                                                                                                                                                                                                                                                                                                                                                                                                                                                                                                                                                                                                                                                                                                                                             |
|-------------------------------|-----------------------------------------------------------------------------------------------------------------------------------------------------------------------------------------------------------------------------------------------------------------------------------------------------------------------------------------------------------------------------------------------------------------------------------------------------------------------------------------------------------------------------------------------------------------------------------------------------------------------------------------------------------------------------------------------------------------------------------------------------------------------------------------------------------------------------------------------------------------------------------------------------------------------------------------------------------------------------------------------------------------------------------------------------------------------------------------------------------------------------------------------------------------------------------------------------------------------------------------------------------------------------------------------------------------------------------------------------------------------------------------------------------------------------------------------------------------------------------------------------------------------------------------------------------------------------------------------------------------------------------------------------------------------------------------------------------------------------------------------------------------------------------------------------------------------------------------------------------------------------------------------------------------------------|
| <b>Manuscript Number:</b>     | PONE-D-20-16268R1                                                                                                                                                                                                                                                                                                                                                                                                                                                                                                                                                                                                                                                                                                                                                                                                                                                                                                                                                                                                                                                                                                                                                                                                                                                                                                                                                                                                                                                                                                                                                                                                                                                                                                                                                                                                                                                                                                           |
| <b>Article Type:</b>          | Research Article                                                                                                                                                                                                                                                                                                                                                                                                                                                                                                                                                                                                                                                                                                                                                                                                                                                                                                                                                                                                                                                                                                                                                                                                                                                                                                                                                                                                                                                                                                                                                                                                                                                                                                                                                                                                                                                                                                            |
| <b>Full Title:</b>            | A comparative analysis of important public clinical trial registries, and a proposal for an interim ideal one                                                                                                                                                                                                                                                                                                                                                                                                                                                                                                                                                                                                                                                                                                                                                                                                                                                                                                                                                                                                                                                                                                                                                                                                                                                                                                                                                                                                                                                                                                                                                                                                                                                                                                                                                                                                               |
| <b>Short Title:</b>           | Important public clinical trial registries                                                                                                                                                                                                                                                                                                                                                                                                                                                                                                                                                                                                                                                                                                                                                                                                                                                                                                                                                                                                                                                                                                                                                                                                                                                                                                                                                                                                                                                                                                                                                                                                                                                                                                                                                                                                                                                                                  |
| <b>Corresponding Author:</b>  | Gayatri Saberwal, Ph.D.<br>Institute of Bioinformatics and Applied Biotechnology<br>Bangalore, Karnataka INDIA                                                                                                                                                                                                                                                                                                                                                                                                                                                                                                                                                                                                                                                                                                                                                                                                                                                                                                                                                                                                                                                                                                                                                                                                                                                                                                                                                                                                                                                                                                                                                                                                                                                                                                                                                                                                              |
| <b>Keywords:</b>              | Clinical trial registry; Primary registry; ICTRP; ClinicalTrials.gov; ethics; Regulatory issues                                                                                                                                                                                                                                                                                                                                                                                                                                                                                                                                                                                                                                                                                                                                                                                                                                                                                                                                                                                                                                                                                                                                                                                                                                                                                                                                                                                                                                                                                                                                                                                                                                                                                                                                                                                                                             |
| <b>Abstract:</b>              | <p><b>Background</b><br/>It is an ethical and scientific obligation to register each clinical trial, and report its results, accurately, comprehensively and on time. The WHO recognizes 17 public registries as Primary Registries, and has also introduced a set of minimal standards in the International Standards for Clinical Trial Registries (ISCTR) that primary registries need to implement. These standards are categorized into nine sections — Content, Quality and Validity, Accessibility, Unambiguous Identification, Technical Capacity, Administration and Governance, the Trial Registration Data Set (TRDS), Partner registries and Data Interchange Standards. This study compared the WHO's primary registries, and the US's ClinicalTrials.gov, to examine the implementation of ISCTR, with the aim of defining features of an interim ideal registry.</p> <p><b>Methods and Findings</b><br/>The websites of the 18 registries were evaluated for 14 features that map to one or more of the nine sections of ISCTR, and assigned scores for their variations of these features. The assessed features include the nature of the content; the number and nature of fields to conduct a search; data download formats; the nature of the audit trail; the health condition category; the documentation available on a registry website; and so on. Overall, the registries received between 27% and 80% of the maximum score of 94. The results from our analysis were used to define a set of features of an interim ideal registry.</p> <p><b>Conclusions</b><br/>To the best of our knowledge, this is the first study to quantify the widely divergent quality of the primary registries' compliance with the ISCTR. Even with this limited assessment, it is clear that some of the registries have much work to do, although a mere dozen improvements would significantly improve them.</p> |
| <b>Order of Authors:</b>      | Nisha Venugopal<br>Gayatri Saberwal, Ph.D.                                                                                                                                                                                                                                                                                                                                                                                                                                                                                                                                                                                                                                                                                                                                                                                                                                                                                                                                                                                                                                                                                                                                                                                                                                                                                                                                                                                                                                                                                                                                                                                                                                                                                                                                                                                                                                                                                  |
| <b>Response to Reviewers:</b> | <p>Response to Reviewers</p> <p>REVIEWER #1: Overall this is a useful and very timely piece of work which, as the authors say, could trigger further work on registry assessment and a wider debate on how trial registries can both improve the features they offer and become more consistent. In general it is well written and well referenced, and is supported by a comprehensive set of detailed data as supplementary files. The authors acknowledge the limitations of their study and include a useful set of suggestions for an 'ideal registry' as an aspiration to work towards.</p> <p>I have some reservations about some aspects of the paper, however, which I think</p>                                                                                                                                                                                                                                                                                                                                                                                                                                                                                                                                                                                                                                                                                                                                                                                                                                                                                                                                                                                                                                                                                                                                                                                                                                   |

detract from its overall quality – but which I hope can be easily rectified:  
Authors: We thank the reviewer for the appreciative comments.

-----  
1) I found the organisation of some of the material confused. In particular the very short methods section provides little detail about the 17 features selected as the basis of assessment, how and why they were selected, and by whom, and how decisions on weighting were made, and why 3 were not assessed. Later on, in table 2b and as a large part of the 'Discussion of specific features...' in Box 1, much of this material is covered, but I think it would have been simpler and more logical to bring these explanations together as part of an expanded methods section. Box 1 is embedded in the discussion but its content seems largely a justification of the scorecard's construction. The result is that the reader has to work harder than they should to understand how and why the scoring system was constructed.

Authors: We have reorganized the Methods section, and added further details. This includes portions from Box 1. We have also moved Table 2b to the methods section (where it is now Table 1) to make the rationale of the scorecard available upfront. Additionally, we wish to highlight that lines 128–130 describe how the authors selected the criteria for the scorecard, based on a review of the literature, but mainly focussing on the ISCTR guidelines.

-----  
2) Similarly I think the results section could be better organised. Why not simply go through the results for each of the 14 areas assessed, noting at that point the median and the range of scores, techniques and difficulties in assessment, and possible caveats around the scores obtained? The current section provides useful tables and a brief summary, but much of the text is simply restating what was assessed. Would a simple pie chart be a useful way of summarising the total numbers data in table 1, to show the proportion of total registry entries included in each?

Authors: We have rewritten and reorganized the Results and Discussion. We have created the suggested pie chart, and have also presented other data from the erstwhile Table 1 as a figure.

-----  
3) A minor point, but there 10 superscript references in Table 1, presumably to some explanatory notes about the data point presented, but I could not find any explanation for them, either in the main text or the supplementary material. They should either be removed or (better) the explanatory notes should be provided.

Authors: These notes were inadvertently left out due to the complications of submitting large tables in a particular format. They are visible in the revised Table.

-----  
4) I thought the discussion was a little timid. The work was done in early 2020, in the context of a pandemic that has dramatically underscored the need for good quality, consistent and easily available information from trial registries, partly to be able to track the numbers, types and results of trials relating to COVID-19, partly because public health decisions require a network of data sources at a global level and registries should be a key part of this. That point might have been worth including – improving trial registry systems has become more urgent!

Authors: We have rewritten the discussion, which include the following lines.  
“The ongoing Covid-19 pandemic has forcefully brought home the need for high quality trial registries with information that is consistent, comprehensive and available in a user-friendly fashion. Billions of people need to be immediately protected from the virus, and large numbers of drugs and vaccines are in trials. There is world-wide interest in these trials, and information that is being tracked includes what is being trialled; where are these trials taking place; and what are the results of these trials? Each country needs to take public health decisions, which will evolve as trials running in different parts of the world yield results. Public trial registries are one of the fastest ways of communicating these results.

Further, the publicly available, freely accessible information in trial registries helps to build trust with the public [26,44]. Covid-19 trials have been among the fastest recruiting trials in history [50,51], and it is possible that the publicly available information in trial registries has helped many of the potential trial participants decide to

enrol.

It is not just that everyone is interested in the positive outcomes of trials. For example, an inspection of the CTRI records of hundreds of covid-19 trials being run in India has thrown up quality issues in almost all of them. Based on negative publicity, the government has taken action in some cases [52].”

-----  
5) Similarly, although there is a general sentiment expressed that registries should improve, there were no concrete suggestions as to how this might be achieved or who needs to be involved, e.g. by greater collaboration between registries, perhaps orchestrated by the WHO, or by using the influence of funders and publishers to re-iterate the need for greater consistency. Are some of the aspects that were assessed easier to improve than others? If so how could they be progressed? Should there be a web page with a regularly updated 'score card' for the trial registries? I appreciate this was an initial survey but I think it might have been useful to venture, if only briefly, into this area in the discussion.

Authors: We have added the following lines to the Results and Discussion:  
There is a long history of various stakeholders arguing for the need to improve registries and the quality of trial registration. Examples include academics and health activists [53–55], journals (ICMJE) [56], WHO [41], registry managers [57], funders [58,59] and governments [60]. Each of these efforts has led to some improvements in the number and quality of trial records hosted by registries. However none of them has led to a perfect set of records. It is likely that the only way this will be achieved is if all stakeholders continue to apply pressure on the registries. Studies such as this one help to highlight deficiencies, which adds to the other efforts aimed at improving registries. Further, the authors would welcome other researchers' efforts to create and update a website that lists the scorecard, with periodic updates. Should such a website not be created by any other group, the authors intend to re-evaluate the registries' performance on the scorecard every few years.

-----  
6) Another issue largely missing from the discussion: the authors mention that registries have many different types of users – researchers, clinicians, members of the public, data scientists, etc. I wonder if this should therefore lead to different scoring systems – perhaps with different weightings and / or items – for each of those major user groups. Those could provide additional insight into the strengths and weakness of different repositories, and thus more clearly identify areas of improvement, but could also be consolidated into an overall score if desired. For example, although the authors state their assumption is that most users would not have the technical expertise to use APIs, and / or scraping and crawling systems to retrieve data, the integration of trial registries with other data systems, and thus the ability to support bulk download by machines, is becoming increasingly important. I would have liked to have seen this aspect more explicitly included in any 'to do list' of possible future assessments, along with considerations of data quality, completeness, and the support for reporting results

Authors: In the Discussion, while enumerating the various kinds of users of registry data, we have stated that “Other categories of users, such as medical professionals, patients, trial sponsors, policy makers, data scientists and so on, may wish to alter the assessed features, or the scoring, in order to rank the registries according to their priorities. For instance, a data scientist would be very appreciative of ANZCTR, which specifically enables web crawling of its records [49]. Furthermore, the managers of other registries, either public or private, and either based on the data in the PR+ or not, may be interested in the results of this study.”. We do not feel confident of creating different scoring systems. Ideally, this should be done by polling at least a few individuals in each category of users, and we would find it extremely challenging to do this in India. As such, any additional scoring system that we developed would be based on unvalidated assumptions, and would be unconvincing, even to us.

-----  
7) There is a minor but distracting typo in the first paragraph of the Results section (5,72,901)

Authors: We had used the Indian system. We have corrected this to 572,901.

-----

Having listed all of the points above I would re-iterate that overall I think the paper is useful and should be published. The points are offered as suggestions for possible improvement.

REVIEWER #2:

The concept is interesting but needs to be re-written.

1. The paper should first start with a good explanation of the origins of the ISCTR. For example, "following the Ministerial Summit on Health Research that took place in Mexico City, Mexico, in November 2004, participants called for the WHO to facilitate the establishment of: "a network of international clinical trials registers to ensure a single point of access and the unambiguous identification of trials".

Authors: We have rewritten the Introduction to include these events and further details of the ICTRP.

2. <https://www.who.int/ictrp/about/en/> The authors need to be more complete in explaining the WHO registry network including primary vs partner registries as well as data providers; the differences of each. Then as it relates to registries what kind of papers have been published; findings; some of this is introduced at a high level in the discussion section which belongs in the introduction.

Authors: We have include these points in the Introduction.

3. The authors are not clear in their terminology (for example, versions vs features). There is reference to WHO's 24-field Trial Registration Data Set vs 17 features vs 14 features selected by the authors; there is reference to the 9 standards; hence it is not clear how these "concepts" inter-relate (24 vs 17 vs 9; data set vs standards) and why the authors selected 14 features (which is perhaps more attributes than features).

Authors: We have now ensured the following:

(a) the word 'section' only refers to one or more of the nine sections of the ISCTR;  
(b) the word 'feature' only refers to one or more of the 14 features of each registry that are the focus of this study;

(c) since the different registries may have different variants of each 'feature', we use the word 'variation' in this context.

We have also included this list as a Box within Methods so that readers have no confusion regarding the terminology used.

4. How does WHO refer to author defined "features".

Authors: As described in Methods, the 'features' defined in this study have been compiled by the authors from different sources, including ISCTR. Therefore ISCTR discusses some, but not all, of these features directly. However, each feature maps to one or more standards set forth in ISCTR.

5. The score card is hard to follow; the scoring is not understandable (for example, "for features with multiple variants, the score ranges from 1 to 5" is not clear and then how scores were calculated: as in the case of chCTR for advanced search fields TRDS a score of 17 was assigned).

Authors: We have reorganized the Methods section, and added further details. This includes portions from Box 1. We have also moved Table 2b to the methods section (where it is now Table 1) to make the rationale of the scorecard available upfront. Further, we have rewritten the Results and Discussion to include a more detailed analysis of the findings. We hope this alleviates the confusion around the scorecard.

6. The meaning of the scorecard is not clear; the interpretation of the findings are inconsistent and leaves the reader bewildered.

Authors: We regret that the first version of the manuscript was so confusing. Please refer to our response to the comment before this (Comment 5).

7. Please see specific comments in the attached word document.  
 Authors: Please find below a response to each of the comments in the manuscript file, which we have numbered from 7.1 to 7.44). In each case we have referenced the line in the original pdf, where the reviewer's comment has been taken from.

-----

7.1 Perhaps to elaborate on the 14 features briefly: what do they cover off on. (Line 31)  
 Authors: This has been done. [Lines 32–35, and 41–44 of the revised manuscript]

-----

7.2 Would not include limitations here. Only in the body of the paper under the proper section. (Line 42)  
 Authors: This has been done.

-----

7.3 New information should not be introduced in the conclusion; rather include in the results section. (Line 51)  
 Authors: This has been done. [Lines 587–589 of the revised manuscript]

-----

7.4 such as? Elaborate (Line 53)  
 Authors: This has been done. [Lines 63–68 of the revised manuscript]

-----

7.5 elaborate on types of comments and analyses. (Line 67)  
 Authors: This has been done. [Lines 72–76 of the revised manuscript]

-----

7.6 awkwardly written. "Set up to facilitate"? The ICTRP was designed to help facilitate. (Line 68)  
 Authors: This has been reworded. [Lines 81–85 of the revised manuscript]

-----

7.7 replace wording with "not an ICTRP recognized registry"... (Line 71)  
 Authors: This has been reworded. [Lines 85–88 of the revised manuscript]

-----

7.8 why were the other partner registries not included? or at least some of the other partner registries? (Line 74)  
 Authors: We have not included \*any\* partner registry in our analysis. This issue has been covered in more detailed now. [Lines 88–93 of the revised manuscript]

-----

7.9 Write as Primary Registries Plus (PR+) (Line 74)  
 Authors: This has been done. [Lines 92–93 of the revised manuscript]

-----

7.10 Define the nine sections... (Line 77)  
 Authors: This has been done. [Lines 97–100 of the revised manuscript]

-----

7.11 Recommend using 3rd person objective. Not "we" (Line 77)  
 Authors: It would be extremely challenging to rewrite the Methodology in 3rd person. However, we have ascertained that 'we' is used in the Methods' section, in articles that have appeared in well-known journals including PLOS ONE such as:  
<https://www.bmj.com/content/362/bmj.k3218>  
<https://trialsjournal.biomedcentral.com/articles/10.1186/1745-6215-15-428>  
<https://journals.plos.org/plosone/article?id=10.1371/journal.pone.0193088#sec006>  
 We hope that it is alright if we leave the construction as it is.

-----

7.12 not clear: using terms like versions, features, sections - difficult for the reader to follow (Line 83)  
 Authors: We have addressed this in our response to this Reviewer's point 3.

-----  
7.13 important to note that not all fields in clinicaltrial.gov are mandatory. is this the case in other registries as well? (Line 96)

Authors: Yes, it is true that all fields are not mandatory in any registry. However we are only examining the \*presence\* of certain fields, not whether trialists have filled each of them.

-----  
7.14 Authors? (Line 98)

Authors: We have rewritten this sentence and it now reads, 'All analyses were performed by one author (NV) and verified by the other (GS).'

-----  
7.15 Is this part of Methods (Line 102)

Authors: We have formatted the manuscript to more clearly demarcate the different levels of headings.

-----  
7.16 needs to be defined "multiple variants, score ranges" (Line 106)

Authors: We have defined the variants and the score ranges in Table 1.

-----  
7.17 difficult to follow; confusing (Line 107)

Authors: We have moved Table 2b to the methods section (where it is now Table 1) to make the rationale of the scorecard available upfront. We have also illustrated our scoring system with examples early in the Methods section. Additionally, we wish to highlight that lines 128–130 describe how the authors selected the criteria for the scorecard, based on literature review but mainly focussing on the ISCTR guidelines.

-----  
7.18 perhaps to refer to as "attributes"? (Line 117)

Authors: We have determined that 'feature' and 'attribute' are synonyms. Since we have used 'features' throughout the manuscript, we preferred to stick to it. Also, as detailed in our response to the comment 7.12, above, we have rationalized our use of the word 'features' so that there is no confusion over its usage.

-----  
7.19 why 14 of the 17? (Line 118)

Authors: While revising the manuscript, we have removed the three features that were not assessed quantitatively. This leaves 14 features, all of which are in the scorecard. We believe that these changes have removed room for confusion on this point, and improved the readability of the paper.

-----  
7.20 we went from 14 of 17 to 24. Not sure how this ties back to the 9 standards introduced under Methods (Line 120)

Authors: As mentioned in point 7.19, above, we have removed the three features that were assessed quantitatively, and the final number is 14.

Regarding the number 24: As described in the manuscript, one of the 14 features is the WHO's Trial Registration Data Set, or TRDS, which in turn is composed of 24 distinct fields (as defined by ISCTR).

-----  
7.21 weight not weightage (Line 123)

Authors: This has been rewritten. [Lines 229–233 of the revised manuscript]

-----  
7.22 why is this a feature of the "registry" vs what is required by government in the local country. (Line 133)

Authors: In order to avoid possible confusion, we have rephrased the sentence to: "As a first step, it is important to know how many records the database holds. This number should be readily available, and we have therefore analysed the ease of accessing it."

-----  
7.23 why were these two subjects highlighted especially as they were not noteworthy or substantive. (Line 136)

Authors: We have deleted these two features now.

-----  
7.24 is this a server issue; connectivity; (Line 140)

Authors: We do not know the reason for the lag in loading RPCEC results. It seems to be at the RPCEC end, since other registries gave us no problem. In any case, we have deleted the entire feature now.

-----  
7.25 would think this is an important aspect to score; the logic to not score this as half of the registries did not contain is a shortcoming of the analysis as registries that do not have this attribute should receive a lower rating. Completion of variables is less about the registry vs the owner of the "data" (sponsor). (Line 140)

Authors: We have now included in the Results and Discussion our analysis of whether the registry provides the reason for trial termination. However, the information pertaining to this feature is already present in the Extra fields. Hence we have not scored this features separately, since that would result in it being double counted.

-----  
7.26 why these attributes? Why is SSL important? (Line 154)

Authors: We have now included a more detailed description of why SSL is important and why we have included this feature. [Lines 471–481 of the revised manuscript]

-----  
7.27 this is the sponsor's responsibility: QC (Line 166)

Authors: In the Results and Discussion section we have now described why even though QC is the sponsor's responsibility it does not always do this, and how it is the duty of the registry to facilitate higher quality registrations. [Lines 496–501 of the revised manuscript]

-----  
7.28 these points should have been provided in the introduction. (Line 181)

Authors: We have now included these points in the Introduction.

-----  
7.29 there is no enough discussion on what has been done, why there is a gap and how this fills the gap in a meaningful way. (Line 189)

Authors: We have rewritten the Introduction and have discussed the work done so far, and how our study fills a lacuna in the analysis and reporting of registries' performance.

-----  
7.30 why is this ideal? (Line 195)

Authors: As described in the manuscript, we propose an 'interim ideal' registry based on the features that we have assessed. That it is a limited goal on the way to achieving everything that ISCTR requires. And it is the 'ideal' from amongst the various options that one or more of the registries are already using.

-----  
7.31 seems per line 180 to 189 there have been other studies. not clear. (Line 215)

Authors: We believe that the revised manuscript addresses this concern.

-----  
7.32 how was this impartial? (Line 216)

Authors: Primarily based on the recommendations of ISCTR, we determined which features of the registries to assess. All scoring rationales were also based on the minimum standards outlined in the ISCTR, and recommendations from earlier studies in our literature survey. We believe that our scoring is impartial since this protocol rules out scoring that may be biased in favour of, or against, any particular registry.

-----

7.33 over reach as this is a subjective statement; only state represents the authors' perspective not that of others. (Line 220)  
Authors: We have changed this sentence, which now reads "The scorecard above analyses features that are of interest to the authors and, by extension, possibly to other researchers concerned with the health of the trial ecosystem overall."

-----  
7.34 not clear (Line 222)  
Authors: We have rephrased this to the following: "Other categories of users, such as medical professionals, patients, trial sponsors, policy makers, data scientists and so on, may wish to alter the assessed features, or the scoring, in order to rank the registries according to their priorities."

-----  
7.35 registries cannot be interested in something; only those who work on registries (Line 224)  
Authors: We have rephrased the sentence to the following: "Further, the managers of other registries, either public or private, and either based on the data in the PR+ or not, may be interested in the results of this analysis."

-----  
7.36 less about the registry and more about how users utilize unless all fields are required by the registry. (Line 230)  
Authors: We are not sure that we have understood this question. It is true that in no registry are all fields mandatory. Thus it would not be advisable to evaluate the quality of registration, and of information in a particular field, by comparisons across registries. However, as we have described in our response to Reviewer comment 7.13, we are only examining the presence of certain fields, not whether trialists have filled each of them.

-----  
7.37 need to write using English proper language fit for scientific publication (Line 238)  
Authors: We have rephrased the sentence to the following: "As noted above, 41% of the records are held in the other PR+, and they need to be examined as well."

-----  
7.38 Define (Page 19, Box 1)  
Authors: We have described our assessment of this feature in greater detail in the revised manuscript.

-----  
7.39 more importantly why do registries include something not recommended by ISCTR? (Page 20, Box 1)  
Authors: We have added the following lines to the manuscript: "There may be a range of reasons for including these Extra fields. For instance, India had been criticized for the lack of appropriate oversight to ensure the ethical conduct of trials, and therefore CTRI asked trialists for details of the ethics committee even before ISCTR required this information [38,39]. Also, there have been demands from the Cochrane collaboration, and many other individuals and groups, to include several additional items in the ISCTR list, which WHO has not agreed to. It is alleged that the recommended list is closer to what industry demanded [40]. As such, although ISCTR may not list every field that many people believed to be essential, managers of particular registries may have chosen to list some of them."

-----  
7.40 Restructure: what does WHO require; what do registries do; where is the difference and impact on value of registries. (Page 20, Box1)  
Authors: In each section of the Results and Discussion, we provide an introductory line, then the results, then the discussion. We have done this, incorporating the Reviewer's points in this section.

-----  
7.41 is this an author term? It is a prospective trial even if data is only entered after the study starts. (Page 21, Box1)



|  |                                                                                                                                                                                                                                                                                                                                                                                                                                                                                                                                                                                                                                                                                                                                                                                                                                                                                                                                                                                                                                                                                                                                                                                                                                                                                                                                                                                                                                                                                                                                                                                                                                                                                                                                                                                                                                                               |
|--|---------------------------------------------------------------------------------------------------------------------------------------------------------------------------------------------------------------------------------------------------------------------------------------------------------------------------------------------------------------------------------------------------------------------------------------------------------------------------------------------------------------------------------------------------------------------------------------------------------------------------------------------------------------------------------------------------------------------------------------------------------------------------------------------------------------------------------------------------------------------------------------------------------------------------------------------------------------------------------------------------------------------------------------------------------------------------------------------------------------------------------------------------------------------------------------------------------------------------------------------------------------------------------------------------------------------------------------------------------------------------------------------------------------------------------------------------------------------------------------------------------------------------------------------------------------------------------------------------------------------------------------------------------------------------------------------------------------------------------------------------------------------------------------------------------------------------------------------------------------|
|  | <p>Authors: 'Retrospective trials' is used by other researchers – it is not our term. Nevertheless, earlier in the manuscript, we have added an explanatory line "Trials may be registered either prospectively or retrospectively, that is before the enrolment of the first participant or after." Also, in order to avoid ambiguity, we have rephrased this sentence as follows: "Further, flagging retrospectively registered ones may shame the registrants into registering prospectively in future".</p> <p>-----</p> <p>7.42 what were the findings? (Page 21, Box1)<br/> Authors: We have revised the text to include the findings of the analysis.</p> <p>-----</p> <p>7.43 how was 3 assigned out of 5: what does a value of 1 or 2 or 3 or 4 or 5 represent? (Page 8, Table 2a)<br/> Authors: As explained in the response to the Reviewer's comment 5, we have moved Table 2b to the methods section (where it is now Table 1) to make the rationale of the scorecard available upfront. We hope this will alleviate the confusion regarding scoring.</p> <p>-----</p> <p>7.44 11? 17? thought scores were 1 to 5. (Page 8, Table 2a)<br/> Authors: Please refer our response to the previous point (Reviewer's comment 7.43)</p> <p>-----</p> <p>8. The topic is interesting but the paper needs to be rewritten and the concept of a scorecard has to be rethought to ensure it has logical relevance to the reader, that the scoring is understandable and can be interpreted thereby leading to actionable insights.<br/> Authors: We have rewritten and reorganized the manuscript, and we hope that these changes address the reviewer's concerns.</p> <p>-----</p> <p>9. The paper has to be placed in context of other relevant studies completed to date.<br/> Authors: We have rewritten the Introduction to address this concern.</p> |
|--|---------------------------------------------------------------------------------------------------------------------------------------------------------------------------------------------------------------------------------------------------------------------------------------------------------------------------------------------------------------------------------------------------------------------------------------------------------------------------------------------------------------------------------------------------------------------------------------------------------------------------------------------------------------------------------------------------------------------------------------------------------------------------------------------------------------------------------------------------------------------------------------------------------------------------------------------------------------------------------------------------------------------------------------------------------------------------------------------------------------------------------------------------------------------------------------------------------------------------------------------------------------------------------------------------------------------------------------------------------------------------------------------------------------------------------------------------------------------------------------------------------------------------------------------------------------------------------------------------------------------------------------------------------------------------------------------------------------------------------------------------------------------------------------------------------------------------------------------------------------|

**Additional Information:**

| <b>Question</b> | <b>Response</b> |
|-----------------|-----------------|
|-----------------|-----------------|

|                                                                                                                                                                                                                                                                                                                                                                                                                                                                                                     |                                                                                                                                                                                                                                                                                                                                                                                                                                                            |
|-----------------------------------------------------------------------------------------------------------------------------------------------------------------------------------------------------------------------------------------------------------------------------------------------------------------------------------------------------------------------------------------------------------------------------------------------------------------------------------------------------|------------------------------------------------------------------------------------------------------------------------------------------------------------------------------------------------------------------------------------------------------------------------------------------------------------------------------------------------------------------------------------------------------------------------------------------------------------|
| <p><b>Financial Disclosure</b></p> <p>Enter a financial disclosure statement that describes the sources of funding for the work included in this submission. Review the <a href="#">submission guidelines</a> for detailed requirements. View published research articles from <a href="#">PLOS ONE</a> for specific examples.</p> <p>This statement is required for submission and <b>will appear in the published article</b> if the submission is accepted. Please make sure it is accurate.</p> | <p>GS received internal institutional funds. These were partially from the Government of Karnataka's Department of Information Technology, Biotechnology and Science &amp; Technology (<a href="https://itbtst.karnataka.gov.in/english">https://itbtst.karnataka.gov.in/english</a>). There was no grant number.</p> <p>The funders had no role in study design, data collection and analysis, decision to publish, or preparation of the manuscript.</p> |
|-----------------------------------------------------------------------------------------------------------------------------------------------------------------------------------------------------------------------------------------------------------------------------------------------------------------------------------------------------------------------------------------------------------------------------------------------------------------------------------------------------|------------------------------------------------------------------------------------------------------------------------------------------------------------------------------------------------------------------------------------------------------------------------------------------------------------------------------------------------------------------------------------------------------------------------------------------------------------|

**Unfunded studies**

Enter: *The author(s) received no specific funding for this work.*

**Funded studies**

Enter a statement with the following details:

- Initials of the authors who received each award
- Grant numbers awarded to each author
- The full name of each funder
- URL of each funder website
- Did the sponsors or funders play any role in the study design, data collection and analysis, decision to publish, or preparation of the manuscript?
- **NO** - Include this sentence at the end of your statement: *The funders had no role in study design, data collection and analysis, decision to publish, or preparation of the manuscript.*
- **YES** - Specify the role(s) played.

\* typeset

**Competing Interests**

Use the instructions below to enter a competing interest statement for this submission. On behalf of all authors, disclose any [competing interests](#) that could be perceived to bias this work—acknowledging all financial support and any other relevant financial or non-financial competing interests.

This statement **will appear in the published article** if the submission is accepted. Please make sure it is accurate. View published research articles from [PLOS ONE](#) for specific examples.

The authors have declared that no competing interests exist.

**NO authors have competing interests**

Enter: *The authors have declared that no competing interests exist.*

**Authors with competing interests**

Enter competing interest details beginning with this statement:

*I have read the journal's policy and the authors of this manuscript have the following competing interests: [insert competing interests here]*

\* typeset

**Ethics Statement**

Enter an ethics statement for this submission. This statement is required if the study involved:

- Human participants
- Human specimens or tissue
- Vertebrate animals or cephalopods
- Vertebrate embryos or tissues
- Field research

Write "N/A" if the submission does not require an ethics statement.

General guidance is provided below. Consult the [submission guidelines](#) for detailed instructions. **Make sure that all information entered here is included in the Methods section of the manuscript.**

Not applicable

**Format for specific study types**

**Human Subject Research (involving human participants and/or tissue)**

- Give the name of the institutional review board or ethics committee that approved the study
- Include the approval number and/or a statement indicating approval of this research
- Indicate the form of consent obtained (written/oral) or the reason that consent was not obtained (e.g. the data were analyzed anonymously)

**Animal Research (involving vertebrate animals, embryos or tissues)**

- Provide the name of the Institutional Animal Care and Use Committee (IACUC) or other relevant ethics board that reviewed the study protocol, and indicate whether they approved this research or granted a formal waiver of ethical approval
- Include an approval number if one was obtained
- If the study involved *non-human primates*, add *additional details* about animal welfare and steps taken to ameliorate suffering
- If anesthesia, euthanasia, or any kind of animal sacrifice is part of the study, include briefly which substances and/or methods were applied

**Field Research**

Include the following details if this study involves the collection of plant, animal, or other materials from a natural setting:

- Field permit number
- Name of the institution or relevant body that granted permission

**Data Availability**

Authors are required to make all data underlying the findings described fully available, without restriction, and from the time of publication. PLOS allows rare exceptions to address legal and ethical concerns. See the [PLOS Data Policy](#) and [FAQ](#) for detailed information.

Yes - all data are fully available without restriction

A Data Availability Statement describing where the data can be found is required at submission. Your answers to this question constitute the Data Availability Statement and **will be published in the article**, if accepted.

**Important:** Stating 'data available on request from the author' is not sufficient. If your data are only available upon request, select 'No' for the first question and explain your exceptional situation in the text box.

Do the authors confirm that all data underlying the findings described in their manuscript are fully available without restriction?

**Describe where the data may be found in full sentences. If you are copying our sample text, replace any instances of XXX with the appropriate details.**

- If the data are **held or will be held in a public repository**, include URLs, accession numbers or DOIs. If this information will only be available after acceptance, indicate this by ticking the box below. For example: *All XXX files are available from the XXX database (accession number(s) XXX, XXX).*
- If the data are all contained **within the manuscript and/or Supporting Information files**, enter the following: *All relevant data are within the manuscript and its Supporting Information files.*
- If neither of these applies but you are able to provide **details of access elsewhere**, with or without limitations, please do so. For example:

*Data cannot be shared publicly because of [XXX]. Data are available from the XXX Institutional Data Access / Ethics Committee (contact via XXX) for researchers who meet the criteria for access to confidential data.*

*The data underlying the results presented in the study are available from (include the name of the third party*

Most relevant data are within the manuscript and its Supporting Information files. Some data is available on the websites of the registries, at URLs that are referenced in the various Supplementary Files, as relevant.

*and contact information or URL).*

- This text is appropriate if the data are owned by a third party and authors do not have permission to share the data.

\* typeset

Additional data availability information:

**A comparative analysis of important public clinical trial registries, and a proposal for an interim ideal one [CLEAN COPY]**

3

Nisha Venugopal and Gayatri Saberwal\*

6

Emails: nisha.venugopal2015@gmail.com, gayatri@ibab.ac.in

9

Authors' affiliation:

Institute of Bioinformatics and Applied Biotechnology

12 Biotech Park, Electronics City Phase 1

Bengaluru 560100

Karnataka

15 India

18 \*Corresponding author:

E-mail: gayatri@ibab.ac.in

21

Keywords: Clinical trial registry, Primary registry, ICTRP, ClinicalTrials.gov, Ethics,

24 Regulatory issues

## Abstract

### Background

27 It is an ethical and scientific obligation to register each clinical trial, and report its results,  
accurately, comprehensively and on time. The WHO recognizes 17 public registries as  
Primary Registries, and has also introduced a set of minimal standards in the International  
30 Standards for Clinical Trial Registries (ISCTR) that primary registries need to implement.  
These standards are categorized into nine sections — Content, Quality and Validity,  
Accessibility, Unambiguous Identification, Technical Capacity, Administration and  
33 Governance, the Trial Registration Data Set (TRDS), Partner registries and Data Interchange  
Standards. This study compared the WHO's primary registries, and the US's  
ClinicalTrials.gov, to examine the implementation of ISCTR, with the aim of defining  
36 features of an interim ideal registry.

### Methods and Findings

39 The websites of the 18 registries were evaluated for **14 features** that map to one or more of  
the nine sections of ISCTR, and assigned scores for their variations of these features. The  
assessed features include the nature of the content; the number and nature of fields to conduct  
42 a search; data download formats; the nature of the audit trail; the health condition category;  
the documentation available on a registry website; **and so on.** Overall, the registries received  
**between 27% and 80% of the maximum score of 94.** The results from our analysis were used  
45 to define a set of features of an interim ideal registry.



## Conclusions

48 To the best of our knowledge, this is the first study to quantify the widely divergent quality of  
the primary registries' compliance with the ISCTR. Even with this limited assessment, it is  
clear that some of the registries have much work to do, although a mere dozen improvements  
51 would significantly improve them.

## Introduction

54 The first two calls for clinical trial registries were made in the 1970s [1]. One aimed to  
enhance the enrolment of patients in ongoing trials, and the other to reduce the possibility of  
bias in the subsequent reporting of trial results, caused by the selective publication of those  
57 with positive outcomes. Since the year 2000, trial registries have proliferated. Nevertheless, it  
has been a long and sustained battle by many stakeholders – activists, journals, researchers,  
funders, governments and the World Health Organization (WHO) – to ensure that large  
60 numbers of trials are registered [2–4]. Although the initial two aims for setting up registries  
continue to be among the most important uses of such databases, researchers have utilized the  
data in at least a dozen other ways, such as (i) analyzing the conditions, the medical  
63 interventions, the sponsors and so on of Expanded Access Studies registered in the United  
States (US) [5], (ii) identifying the fraction of trials that have run in the country, that had  
industry involvement [6]; (iii) conducting a geo-temporal analysis of the trials of novel stem  
66 cell therapies [7]; (iv) obtaining information about a trial that was not reported in the  
subsequent publication [8]; and (v) identifying trials being run in contravention to the law [9].  
Given these numerous and diverse purposes, not initially envisaged, it is even more important  
69 that all trials are registered and reported in a timely fashion, and that all the data in each  
record is complete, reliable and readily accessible. In view of this, the quality of data in the  
databases has long been the subject of analysis and comment. These include (a) analyses of

72 the quality of registration and missing information in trial records [10–13], (b) studies on the  
discrepancies in trial status for trials that are registered in more than one registry [14], and (c)  
reports on the phenomenon of hidden duplicates [15,16]. Other studies have looked into the  
75 challenges faced, and advances made by individual registries [17,18].

Certain high profile scandals [19,20] resulted in numerous calls to increase transparency in  
78 clinical trials and to improve the public’s trust in the trials enterprise. Following the  
Ministerial Summit on Health Research that took place in Mexico City in November 2004,  
the WHO launched the International Clinical Trials Registry Platform (ICTRP) initiative in  
81 2006 [21].

The ICTRP enables a single point of access to information regarding trials within its registry  
84 network [22], which hosts trial records from around the world. The network consists of (i)  
Primary Registries (PRs), (ii) Data providers, and (iii) Partner registries [23]. There are  
currently 17 PRs. The Data providers include the PRs and ClinicalTrials.gov (CTG), of the  
87 United States (US). All data providers need to fulfil the same criteria in terms of data  
collection and management. The two partner registries (i) are not required to fulfil the criteria  
that PRs need to; (ii) need to be affiliated with one of the PRs; and (iii) cannot directly feed  
90 data into the ICTRP [24]. Therefore, we have not included the these two registries in our  
study. We have analyzed the 17 PRs, and CTG, and refer to them, collectively, as Primary  
Registries Plus, or PR+.

93  
The WHO also developed the International Standards for Clinical Trial Registries (ISCTR)  
[25], which lists the minimum, and sometimes ideal, standards that PRs should adopt to  
96 ensure a basic quality of data and accessibility. These standards are in nine sections —  
Content; Quality and Validity; Accessibility; Unambiguous Identification; Technical  
Capacity; Administration and Governance; the 24-field Trial Registration Data Set (TRDS);

99 Partner Registries; and Data Interchange Standards. Although, ICTRP stipulates that non-  
compliance with these standards can result in revoking of Primary Registry status, we are  
unaware of any case where this has happened.

102

It is known that users trust public registries more than those created by companies or patient  
groups [26]. Also, public registries are often the primary sources on which other databases  
105 are built [26]. It follows that the information in each one should be comprehensive, high  
quality and available in a user-friendly fashion. Accordingly, there have been calls for (i) a  
comparison of such registries, to help develop suitable standards [25], and (ii) ways to  
108 improve the accessibility and content of the PR+ [27]. However, several years ago it was  
shown that there had been non-compliance with the WHO minimal dataset [28], and non-  
optimal website functionality and user experience[10,11,29]. Since across-the-board  
111 improvements have not taken place, this issue needs to be reiterated. However instead of  
undertaking a purely qualitative assessment, we drew inspiration from other researchers'  
scorecards. These scorecards have either been developed [30–33] or proposed [34,35] to track  
114 whether trialists register their studies and report the results accurately, comprehensively and  
on time. Accordingly, we developed one to assess the PR+.

117 We have developed the Registries' Comparative Scorecard (the Scorecard) which rates the  
PR+ on certain features that map to different sections of the ISCTR (S1 Table). We then  
define an interim 'ideal registry' based on the best variations of each feature used by the PR+.  
120 Until such time as all the registries adopt all the standards recommended by ISCTR, the  
adoption of the recommended variations of each feature would be very helpful for users.

## 123 **Methods**

### **Data collection**

We accessed the websites of the 18 PR+ between July 2019 and April 2020, inclusive. The  
126 registries were evaluated for 14 features that map to one or more of the nine sections of  
ISCTR mentioned above. The list of features was compiled by the authors based on literature  
regarding the necessity of higher quality trial registrations [36,37], focusing on the standards  
129 listed in ISCTR [25].

All information was obtained from one or more of the following resources within each PR+  
132 website: (i) the general pages of the site; (ii) a randomly chosen, sample interventional trial  
that was registered after 1 January 2019; (iii) supporting documents, if available; and (iv)  
where necessary and possible, via a login to do a mock registration. All analyses were  
135 performed by one author (NV) and verified by the other (GS), with differences resolved by  
discussion.

138 The sections below provide further methodological details on the data collection for, and  
analysis of, each of the features analysed, which have been classified based on the ISCTR  
section they map to. Reference URLs are available in the Supplementary files, which are  
141 referenced in the Results as relevant.

#### **I. Accessibility features**

144 We first examined the accessibility of information in the PR+. For this, we assessed several  
features, as follows:

147 **(i) The ease of obtaining the total number of trials hosted by the registry:**

The method of obtaining the total number of trials hosted by each PR+ was determined.

Specifically, we documented (a) whether the number was displayed on the home page, (b) if  
150 it was available after a search, or (c) whether it had to be calculated based on the number of  
pages of results. If there was discrepant information at different places on the site, this fact  
was captured.

153

**(ii) The existence of a Basic search function:**

We examined the presence of the search function using a basic search field.

156

**(iii) and (iv) The number of TRDS fields, and extra fields, that can be used to conduct a  
search:**

159 We documented the presence and number of (iii) TRDS fields; and (iv) Extra  
fields, beyond these 24 TRDS fields, that can be used to conduct a search.

162 **(v) The data download options:**

For each PR+, we documented the file formats that are available for data download. We also  
captured information on whether the data on (a) one, (b) a limited number, (c) multiple, or (d)

165 all search results can be downloaded at a time.

## **II. Content or compliance with TRDS features**

168 **(i) TRDS fields and Extra fields:**

Each registry provides information about a trial in two different ‘views’. While conducting a  
search, the user first obtains a list of trials which contains the titles, and may also contain

171 other information. This is called the Brief view. Each trial record is available as a Brief view,  
and a Detailed view. The fields available in these views in each registry were

documented. This information was then mapped to the 24 fields of the WHO TRDS. All

174 additional fields were categorized as ‘Extra fields’.

Among the Extra fields, we looked into the following features in further detail.

177

**(ii) Whether the Principal Investigator (PI) name is compulsory:**

Even though the ISCTR states that the PI is the ‘Contact for Scientific Queries’, unless the PI  
180 delegates this task to somebody else, the PR+ have not uniformly adopted this definition, and  
it is not always clear if the ‘Contact for Scientific Queries’ reflects th the PI. Therefore, we  
have separately looked into whether the PI name specifically, is compulsory.

183

**(iii) The audit trail of each record:**

We wished to know whether, where relevant, a given trial  
186 (a) has an audit trail, and if so, (b) whether the changes are clearly highlighted; and (c)  
whether two versions of the record can be readily compared. In some cases where the sample  
trial, used for most analyses, did not have a history of changes, we used another sample trial,  
189 whose URL is provided in S5 Table.

**(iv) The flagging of retrospectively registered trials:**

192 We documented whether each PR+ specifically mentions the registration status of the trial  
(prospective vs retrospective), or flags retrospectively registered trials.

**(v) The reason for the termination of a trial, if applicable:**

In this case, we first determined whether the PR+ have a category of terminated trials. For  
those that do, we captured whether or not a reason for trial termination is provided.

198

### III. Quality and Validity, Technical Capacity, and Data Interchange

#### Standards features

201 **(i) Use of a controlled vocabulary for the health condition category:**

We evaluated whether (a) there is a drop down menu for choosing a term from a controlled vocabulary, (b) the registry recommends a widely used controlled vocabulary, or (c) the trialist has to use a free text box.

204

207 **(ii) The availability of documentation for the processes of the registry, or information on the site:**

We evaluated the presence of three types of documents, that is (a) a glossary or the definition of each field of the record, (b) a list of frequently asked questions (FAQs) and (c) one or more user guides.

210

**(iii) Security features of the registry website:**

213 The websites were checked for the presence of a basic security feature, an SSL certificate, as reflected in an ‘https’ in the website URL, instead of an ‘http’.

216

**Box 1. Terminology used in the study**

Here, we list a few terms that have been used throughout the study, along with a description of what these refer to:

219

(a) the word ‘section’ only refers to one or more of the nine sections of the ISCTR;

(b) the word ‘feature’ only refers to one or more of the 14 features of each registry that are the focus of this study; and

222

(c) since the different registries may have different variants of each ‘feature’, we use the word ‘variation’ in this context.

225

## The Scorecard

228 Overall, 14 features of the PR+ were assessed. Each registry has a particular variant of a  
 given feature, which may be more useful or less so. A scoring rationale was devised for every  
 feature analysed, based on which each registry received a score for its variation of a given  
 231 feature. The rationale is described in detail in Table 1, and further details are provided in the  
 Results and Discussion section.

234 The following general rules were applied for the scoring system. These are illustrated by  
 particular features in Table 1.

(i) If the feature is absent, the registry gets a score of 0. This is illustrated in features 1.2 and  
 237 1.5.

(ii) For features with multiple variations, the score ranges from 1 to 5 based on pre-set  
 criteria, as defined in Table 1. This is illustrated in features 1.1 and 2.1.

240 (iii) For certain features, which involve counts of fields present, the score increases by 1 point  
 per field. This is illustrated in features 1.3 and 2.2.

(iv) In case a registry has multiple possible scores for a particular feature, the highest one is  
 243 awarded. This is illustrated in feature 1.5.

| <b>Table 1. Rationale for score given to each registry for features used to create the Scorecard.</b><br>The relevant Supplementary files with further details are also referenced. |                                         |                                                                                                                                                                         |                                    |
|-------------------------------------------------------------------------------------------------------------------------------------------------------------------------------------|-----------------------------------------|-------------------------------------------------------------------------------------------------------------------------------------------------------------------------|------------------------------------|
| <b>Feature analyzed</b>                                                                                                                                                             |                                         | <b>Rating scale and rationale</b>                                                                                                                                       | <b>Relevant Supplementary file</b> |
| <b>1</b>                                                                                                                                                                            | <b>Accessibility</b>                    |                                                                                                                                                                         |                                    |
| 1.1                                                                                                                                                                                 | Total number of trials in the registry  | Number displayed on home page: 5<br>Number available after a search: 3<br>Number needs to be calculated: 2<br>Discrepant information at different places on the site: 1 | S2 Table                           |
| 1.2                                                                                                                                                                                 | Existence of Basic search function      | Presence of a basic search function: 5<br>Absence of a basic search function: 0                                                                                         | S2 Table                           |
| 1.3                                                                                                                                                                                 | Advanced search function – TRDS fields  | Each TRDS field: 1                                                                                                                                                      | S2 Table                           |
| 1.4                                                                                                                                                                                 | Advanced search function – Extra fields | Each extra field: 1, but with a cap of 5 overall, because of the idiosyncratic nature of some of the search possibilities.                                              | S2 Table                           |



|                                   |                               |                                                                                                                                                                                                                                                                                        |          |
|-----------------------------------|-------------------------------|----------------------------------------------------------------------------------------------------------------------------------------------------------------------------------------------------------------------------------------------------------------------------------------|----------|
| 1.5                               | Data download options         | Excel/csv/tsv: 5<br>HTML/XML: 2<br>Word/txt/pdf: 1<br>No download options: 0<br>Since all the registries except NTR permit HTML downloads (even if it is not explicitly stated), no registry gets a rating of '1'.                                                                     | S2 Table |
| <b>2 Content or TRDS sections</b> |                               |                                                                                                                                                                                                                                                                                        |          |
| 2.1                               | Brief view: TRDS fields       | 10 or more fields, which are customizable, and wrapping of text: 5<br>10 or more fields, which are customizable, but without wrapping of text: 4<br>A fixed number of fields, that are more than 3: 3<br>Up to 3 fields: 1                                                             | S3 Table |
| 2.2                               | Brief view: Extra fields      | Each field: 1 point                                                                                                                                                                                                                                                                    | S4 Table |
| 2.3                               | Detailed view: TRDS fields    | The number of fields over 20                                                                                                                                                                                                                                                           | S3 Table |
| 2.4                               | Detailed view: Extra fields   | Each field: 1 point<br>In this case, the maximum score is dictated by the registry with the maximum number of fields.                                                                                                                                                                  | S4 Table |
| 2.5                               | Whether PI name is compulsory | PI name is compulsory: 5<br>It is not clear whether the scientific contact is the PI (regardless of whether or not this information is compulsory): 2<br>There is a field for the PI name, but it is not clear whether the information is compulsory: 2<br>The PI name is voluntary: 0 | S5 Table |
| 2.6                               | Audit trail                   | Each of the following aspects receives 1 point: (i) the existence of an audit trail; (ii) the changes made are clearly highlighted; and (iii) it is possible to compare any two versions of the record.                                                                                | S5 Table |
| <b>3 Other Sections</b>           |                               |                                                                                                                                                                                                                                                                                        |          |
| 3.1                               | Health condition              | A drop-down menu for choosing a term from a controlled vocabulary: 5<br>A widely used controlled vocabulary is recommended: 3<br>Free text field: 1                                                                                                                                    | S5 Table |
| 3.2                               | SSL certificate               | Website secured with SSL: 3<br>Website not secured with SSL: 0                                                                                                                                                                                                                         | S5 Table |
| 3.3                               | Documentation                 | Provides (a) a glossary or the definition of each field of the record; (b) List of FAQs; (c) One or more user guides: 1 point each. No points are awarded for the quality of these documents.                                                                                          | S5 Table |

246

## Results and Discussion

We first documented basic information about each of the registries. The full name of each registry, its acronym, the country where it is based, and the year it was established are provided in Fig.1 and Table 2. Except CTG, the acronyms used for each registry are the official acronyms. All but one of the PR+ were established between 2000 and 2010, inclusive. LBCTR was established in 2019. Eight registries (ANZCTR, ChiCTR, CTG, DRKS, IRCT, ISRCTN, JPRN, and SLCTR) allow trial registrations from all countries, and the rest usually from the country where the registry is based, or from specific countries or

255 regions. For example, PACTR caters to clinical trials conducted in Africa. On 18 April 2020,  
 the registries cumulatively held 572,901 records, with CTG accounting for 336,444 (59%).

258 Trials may be registered either prospectively or retrospectively, that is before the enrolment  
 of the first participant or after. Six of the PR+ (CTRI, IRCT, LBCTR, REPEC, SLCTR and  
 TCTR) only allow prospective registration, whereas the remaining accept retrospective as  
 261 well. Five of the PR+ (EU-CTR, IRCT, PACTR, REPEC and SLCTR) accept only  
 interventional clinical trials, while the remaining may accept others such as observational  
 studies, post marketing surveys or expanded access programs. All the registries use English,  
 264 and 11 of them display some or all information in another language as well.

## Figure legend

267

Fig. 1:

A. The timeline of establishment of the PR+. Key events related to trial registration are also  
 270 noted.

B. Number of records per registry as on 18 April 2020. The pie chart shows the distribution  
 of the number of records in each registry. The actual number, and as a percentage of the total,  
 273 are also provided.

**Table 2. An overview of each registry, listing its acronym, full name, country where it is based, countries from where registration is accepted, type of registration allowed, type of study hosted, and language used.**

| Registry acronym | Registry full name                              | Country where registry is based | Countries from where registration is accepted                               | Type of registration allowed            | Type of study                         | Additional language <sup>1</sup> |
|------------------|-------------------------------------------------|---------------------------------|-----------------------------------------------------------------------------|-----------------------------------------|---------------------------------------|----------------------------------|
| ANZCTR           | Australian New Zealand Clinical Trials Registry | Australia                       | All countries. However, trials in Australia and New Zealand are prioritized | Prospective, Retrospective <sup>2</sup> | Interventional, Observational         | –                                |
| ChiCTR           | Chinese Clinical Trial Register                 | China                           | All countries                                                               | Prospective, Retrospective              | Interventional, Observational, Others | Chinese                          |
| CRIS             | Clinical Research Information Service           | Republic of Korea               | Republic of Korea                                                           | Prospective, Retrospective              | Interventional, Observational         | Korean                           |

|                  |                                                                |                 |                                                                                                                                     |                                                                                             |                                                        |                                                               |
|------------------|----------------------------------------------------------------|-----------------|-------------------------------------------------------------------------------------------------------------------------------------|---------------------------------------------------------------------------------------------|--------------------------------------------------------|---------------------------------------------------------------|
| CTG <sup>3</sup> | ClinicalTrials.gov                                             | USA             | All countries                                                                                                                       | Prospective<br>Retrospective                                                                | Interventional,<br>Observational,<br>Expanded Access   | –                                                             |
| CTRI             | Clinical Trials Registry - India                               | India           | Other countries in the region which do not have a Primary Registry of their own <sup>4</sup>                                        | Prospective                                                                                 | Interventional, PMS <sup>5</sup> , BA/BE <sup>5</sup>  | –                                                             |
| DRKS             | German Clinical Trials Register                                | Germany         | All countries                                                                                                                       | Prospective, Retrospective                                                                  | Interventional, Observational, Epidemiological, Others | German                                                        |
| EU-CTR           | EU Clinical Trials Register (EU-CTR)                           | The Netherlands | All interventional trials that have at least one centre in the EU and EEA. Certain trials conducted entirely outside these regions. | Prospective. Retrospective if permitted by National Competent Authority of the Member State | Interventional                                         | Older trials may have content in the host country's language  |
| IRCT             | Iranian Registry of Clinical Trials                            | Iran            | All countries                                                                                                                       | Prospective                                                                                 | Interventional                                         | Persian                                                       |
| ISRCTN           | International Standard Registered Clinical/soCial sTudy Number | UK              | All countries                                                                                                                       | Prospective, Retrospective <sup>2</sup>                                                     | Interventional, Observational                          | –                                                             |
| JPRN             | Japan Primary Registries Network <sup>6</sup>                  | Japan           | All countries                                                                                                                       | Prospective, Retrospective                                                                  | Interventional, Observational                          | Japanese                                                      |
| LBCTR            | Lebanon Clinical Trials Registry                               | Lebanon         | Lebanon                                                                                                                             | Prospective                                                                                 | Interventional, Observational                          | Brief summary of the study is also available in Arabic        |
| NTR              | Netherlands Trial Register                                     | The Netherlands | Trials conducted in Netherlands or involving Dutch researchers.                                                                     | Prospective, Ongoing studies                                                                | Interventional, Observational                          | Some information may be available in Dutch                    |
| PACTR            | Pan African Clinical Trials Registry                           | South Africa    | All countries in Africa                                                                                                             | Prospective, Retrospective                                                                  | Interventional                                         | –                                                             |
| ReBEC            | Brazilian Registry of Clinical Trials                          | Brazil          | Brazil <sup>4</sup>                                                                                                                 | Prospective Retrospective                                                                   | Interventional, Observational                          | Portugese and Spanish, for some records, and in a limited way |
| REPEC            | Peruvian Clinical Trial Registry                               | Peru            | Peru                                                                                                                                | Prospective                                                                                 | Interventional                                         | Spanish                                                       |
| RPCEC            | Cuban Public Registry of Clinical Trials                       | Cuba            | Cuba <sup>7</sup>                                                                                                                   | Prospective, Retrospective                                                                  | Interventional Observational                           | Spanish                                                       |
| SLCTR            | Sri Lanka Clinical Trials Registry                             | Sri Lanka       | All countries                                                                                                                       | Prospective                                                                                 | Interventional                                         | –                                                             |
| TCTR             | Thai Clinical Trials Registry                                  | Thailand        | Thailand                                                                                                                            | Prospective                                                                                 | Interventional, Observational                          | –                                                             |

1. All registries are required to be in English. However, some provide content in additional language(s).
2. Retrospective registration is allowed but prospective registration is preferred and encouraged.
3. Except CTG, all the acronyms listed are the official acronyms.
4. For two registries (CTRI, REBEC) the information on the ICTRP portal and on their own websites is discrepant. Upon inspection, the latter sources appear to be correct, and we have described the registries accordingly.
5. PMS: post-marketing surveillance; BA/BE: Bioavailability/Bioequivalence.
6. Common forum for trials from three Japanese registries, that is (UMIN Clinical Trials Registry (UMIN-CTR), Japan Pharmaceutical Information Center Clinical Trials Information (JAPIC-CTI), and Japan Medical Association - Center for Clinical Trials (JMACCT)).
7. Trials are accepted from Cuban sponsors, conducting trials in Cuba or abroad, with Cuban or foreign products.

Notably, some registries (ChiCTR, EU-CTR, ISRCTN, PACTR, REPEC) were built on earlier versions.

276 We then analysed 14 features of the PR+, which have been grouped according to the sections  
of ISCTR that they map to (S1 Table). In Table 3, we list the score obtained by each PR+ per  
feature, and overall. We also provide the maximum score possible per feature. Further details  
279 are provided below, or are available in relevant Supplementary files, which are referenced in  
Table 1.

**Table 3. The Scorecard.**

The list of features used to create the Scorecard; the maximum score per feature; the score obtained by each registry per feature, and overall per section; the total score per registry; and the rank of each registry.

|          | Max score                               | ANZCTR    | ChiCTR    | CRIS      | CTG       | CTRI      | DRKS      | EU-CTR    | IRCT      | ISRCTN    | JPRN      | LBCTR     | NTR       | PACTR    | ReBEC     | REPEC     | RPCEC     | SLCTR     | TCTR     |           |
|----------|-----------------------------------------|-----------|-----------|-----------|-----------|-----------|-----------|-----------|-----------|-----------|-----------|-----------|-----------|----------|-----------|-----------|-----------|-----------|----------|-----------|
| <b>1</b> | <b>Accessibility section</b>            |           |           |           |           |           |           |           |           |           |           |           |           |          |           |           |           |           |          |           |
| 1.1      | Total number of trials in the registry  | 5         | 3         | 3         | 5         | 5         | 3         | 3         | 5         | 5         | 3         | 3         | 1         | 3        | 3         | 5         | 3         | 2         | 2        | 3         |
| 1.2      | Existence of Basic search function      | 5         | 5         | 0         | 5         | 5         | 5         | 5         | 5         | 5         | 5         | 5         | 0         | 5        | 5         | 5         | 5         | 5         | 0        | 5         |
| 1.3      | Advanced search function – TRDS fields  | 24        | 11        | 17        | 14        | 15        | 10        | 8         | 7         | 17        | 13        | 0         | 9         | 0        | 12        | 4         | 1         | 5         | 2        | 7         |
| 1.4      | Advanced search function – Extra fields | 5         | 1         | 5         | 5         | 5         | 4         | 5         | 3         | 5         | 5         | 0         | 0         | 0        | 2         | 1         | 2         | 0         | 0        | 0         |
| 1.5      | Data download options                   | 5         | 5         | 2         | 2         | 5         | 2         | 5         | 2         | 2         | 5         | 5         | 2         | 0        | 2         | 2         | 2         | 2         | 2        | 2         |
|          | <b>SUB-TOTAL</b>                        | <b>44</b> | <b>25</b> | <b>27</b> | <b>31</b> | <b>35</b> | <b>24</b> | <b>26</b> | <b>22</b> | <b>34</b> | <b>31</b> | <b>13</b> | <b>12</b> | <b>8</b> | <b>24</b> | <b>17</b> | <b>13</b> | <b>14</b> | <b>6</b> | <b>17</b> |
| <b>2</b> | <b>Content or TRDS sections</b>         |           |           |           |           |           |           |           |           |           |           |           |           |          |           |           |           |           |          |           |
| 2.1      | Brief view: TRDS fields                 | 5         | 3         | 3         | 4         | 5         | 3         | 3         | 3         | 3         | 1         | 3         | 3         | 1        | 3         | 3         | 3         | 1         | 1        | 5         |
| 2.2      | Brief view: Extra fields                | 5         | 3         | 1         | 2         | 2         | 0         | 3         | 1         | 3         | 1         | 1         | 1         | 0        | 3         | 0         | 0         | 1         | 5        | 1         |

|          |                                     |           |           |           |           |           |           |           |           |           |           |           |           |           |           |           |           |           |           |           |
|----------|-------------------------------------|-----------|-----------|-----------|-----------|-----------|-----------|-----------|-----------|-----------|-----------|-----------|-----------|-----------|-----------|-----------|-----------|-----------|-----------|-----------|
| 2.3      | Detailed view:<br>TRDS fields       | 4         | 4         | 4         | 3         | 4         | 3         | 2         | 2         | 2         | 4         | 4         | 4         | 3         | 4         | 0         | 3         | 1         | 4         | 3         |
| 2.4      | Detailed view:<br>Extra fields      | 15        | 10        | 5         | 10        | 15        | 8         | 6         | 9         | 7         | 10        | 0         | 9         | 5         | 5         | 4         | 10        | 6         | 5         | 9         |
| 2.5      | Whether PI<br>name is<br>compulsory | 5         | 5         | 5         | 5         | 0         | 0         | 5         | 5         | 2         | 2         | 2         | 2         | 2         | 5         | 0         | 2         | 5         | 2         | 2         |
| 2.6      | Audit trail                         | 3         | 1         | 1         | 3         | 3         | 1         | 3         | 0         | 3         | 2         | 0         | 1         | 0         | 3         | 0         | 0         | 3         | 2         | 0         |
|          | <b>SUB-TOTAL</b>                    | <b>37</b> | <b>26</b> | <b>19</b> | <b>27</b> | <b>29</b> | <b>15</b> | <b>22</b> | <b>20</b> | <b>20</b> | <b>20</b> | <b>10</b> | <b>20</b> | <b>11</b> | <b>23</b> | <b>7</b>  | <b>18</b> | <b>17</b> | <b>19</b> | <b>20</b> |
| <b>3</b> | <b>Other sections</b>               |           |           |           |           |           |           |           |           |           |           |           |           |           |           |           |           |           |           |           |
| 3.1      | Health<br>condition                 | 5         | 5         | 3         | 5         | 3         | 5         | 5         | 5         | 3         | 1         | 5         | 5         | 1         | 5         | 5         | 3         | 1         | 1         | 3         |
| 3.2      | SSL certificate                     | 5         | 5         | 0         | 5         | 5         | 0         | 5         | 5         | 5         | 0         | 5         | 0         | 5         | 5         | 0         | 5         | 0         | 5         | 5         |
| 3.3      | Documentation                       | 3         | 3         | 2         | 2         | 3         | 3         | 3         | 3         | 1         | 3         | 0         | 3         | 0         | 2         | 3         | 2         | 2         | 2         | 3         |
|          | <b>SUB-TOTAL</b>                    | <b>13</b> | <b>13</b> | <b>5</b>  | <b>12</b> | <b>11</b> | <b>8</b>  | <b>13</b> | <b>13</b> | <b>9</b>  | <b>4</b>  | <b>10</b> | <b>8</b>  | <b>6</b>  | <b>12</b> | <b>8</b>  | <b>10</b> | <b>3</b>  | <b>8</b>  | <b>11</b> |
|          | <b>TOTAL</b>                        | <b>94</b> | <b>64</b> | <b>51</b> | <b>70</b> | <b>75</b> | <b>47</b> | <b>61</b> | <b>55</b> | <b>63</b> | <b>55</b> | <b>33</b> | <b>40</b> | <b>25</b> | <b>59</b> | <b>32</b> | <b>41</b> | <b>34</b> | <b>33</b> | <b>48</b> |
|          | <b>% of TOTAL</b>                   |           | <b>68</b> | <b>54</b> | <b>74</b> | <b>80</b> | <b>50</b> | <b>65</b> | <b>59</b> | <b>67</b> | <b>59</b> | <b>35</b> | <b>43</b> | <b>27</b> | <b>63</b> | <b>34</b> | <b>44</b> | <b>36</b> | <b>35</b> | <b>51</b> |
|          | <b>Rank of each<br/>registry</b>    |           | <b>3</b>  | <b>9</b>  | <b>2</b>  | <b>1</b>  | <b>11</b> | <b>5</b>  | <b>7</b>  | <b>4</b>  | <b>7</b>  | <b>15</b> | <b>13</b> | <b>18</b> | <b>6</b>  | <b>17</b> | <b>12</b> | <b>14</b> | <b>15</b> | <b>10</b> |

## 1. Accessibility:

One of the principal reasons for the existence of clinical trial registries is to provide the public with information, and to thereby increase trust in the trial enterprise [28]. Therefore, we first examined the accessibility of information in the PR+. For this, we assessed several features, as described below:

288

### (i) Ease of obtaining the total number of trials

As a first step, it is important to know how many records the database holds. This number should be readily available, and we have therefore analysed the ease of accessing it. The five registries (CRIS, CTG, EU-CTR, IRCT and ReBEC) that list it on the homepage were given the highest score of 5. Ten registries display this number after a search for all trials, and received a score of 3. Two registries (RPCEC, SLCTR), for which the number of records is available only by a manual calculation, received 2. LBCTR provides discrepant information at different places on the site, and thus received the lowest score of 1. The median score obtained was 3. It is a trivial task to put the figure for the total number of trials on the home page, and we encourage all registries to do so

For a significant fraction of users, the search functions are crucially important to access the information in a registry. ISCTR recommends that at the minimum, there must be a basic text search, as well as and it must be possible to search within the interventions and conditions fields. Several PR+ go much further than this, and therefore we have conducted a detailed assessment of their search capabilities.

306 **(ii) Basic Search function**

We determined the presence of a basic search function and have awarded a score of 5 to the 15 registries that provide it. Only three (ChiCTR, LBCTR and SLCTR) do not have this 309 feature, and received 0. The median score was 5.

Most PR+ have a basic search function that enables search by keywords. This is a crucial aspect of the functionality of the trial registry website, and significantly increases the ease of 312 searching for information and improves user experience.

**(iii) Advanced search function - TRDS fields**

315 We then examined how many of the 24 TRDS fields could be used in the Advanced search function. Out of a possible score of 24, where the registries received 1 point per field, the maximum score of 17 was attained by ChiCTR and IRCT. JPRN and NTR do not allow a 318 search by any TRDS field and received 0. The remaining registries received scores between 1 and 15. The median score was 8.5.

321 **(iv) Advanced search function - Extra fields**

A few registries list fields other than the TRDS fields as part of the search function. Six PR+ (ChiCTR, CRIS, CTG, DRKS, IRCT and ISRCTN) have five or more Extra fields, and 324 therefore received a score of 5. Six registries (ANZCTR, CTRI, EU-CTR, PACTR, ReBEC and REPEC) received scores ranging from 1–4. Six registries do not allow a search using any Extra fields, and received 0. The median score was 2.

327 Overall, the PR+ provided more fields in the Advanced search function than the minimum recommended by the ISCTR. This becomes especially relevant for researchers conducting 330 systematic reviews, work which requires extensive searches to gather information on clinical trials in specific areas.

333 **(v) Data download options**

Having conducted a search, users may wish to download many fields of data, for many records. We therefore gave the highest score of 5 to the five registries (ANZCTR, CTG, 336 DRKS, ISRCTN and JPRN) that allow data downloads in a csv, excel or tsv format. 12 registries provide HTML and XML options, and received a score of 2. Only NTR lacks any options for data download, and received 0. The median score was 2.

339

All the available data download options are adequate for the inspection of a few records, but it is essential that the PR+ provide bulk data download options such as csv, especially as an 342 increasing number of users are shifting towards automated systems of analysis.

## **2. Content and TRDS sections**

345 Next, we examined multiple features that map to the Content or TRDS sections, which overlap since the TRDS fields are a form of content. Below, we describe our scoring of the Brief and Detailed views of the PR+.

348

### **(i) Brief View: TRDS fields**

Since the Brief view is primarily designed to provide an overview of the trial, it can be very 351 helpful for a user if the number of fields in the Brief view can be customized. Therefore, we have given higher scores to registries that provide this option. Two registries (CTG and TCTR), display more than 10 TRDS fields, and allow customization and text wrapping. They 354 received the maximum score of 5. CRIS displays more than 10 TRDS fields, that are customizable but without text wrap, and received 4. Eleven registries display more than three fields, which are fixed, and got a score of 3. The four registries (ISRCTN, NTR, RPCEC and 357 SLCTR) that display three fields or less received 1. The median score was 3.



A customizable brief view of search results is extremely useful in a trial registry, where different types of users such as patients, healthcare professionals or sponsors, may be interested in different fields.

### **(ii) Detailed View: TRDS fields**

The Detailed view tends to have all 24 TRDS fields. However, we found that all the PR+ do not yet list the four fields that have been included in the latest version of TRDS [29]. Eight registries (ANZCTR, ChiCTR, CTG, ISRCTN, JPRN, LBCTR, PACTR and SLCTR) do so, and received the highest score of 4. Most of the remaining PR+ display between one and three of the new fields and were scored accordingly. Only one registry, ReBEC, has not been updated to display any of the new fields, and received a score of 0. The median score was 3. We hope that over time more registries will be in full compliance with the ISCTR-mandated fields.

### **(iii) Extra fields**

Registries list Extra fields in both the Brief and Detailed views. In the Brief View, only SLCTR received the maximum score of 5. Four registries (CTRI, NTR, ReBEC and REPEC) have no Extra fields and received a score of 0. The remaining have between one and three of such fields and were scored accordingly. The median score was 1.

In the Detailed View, most registries have between five and 10 Extra fields. However CTG has 15, and JPRN has none. The median score was 7.5.

Some of the Extra fields, such as the date of last update, and whether registration was prospective or retrospective, are recommended by ISCTR. Interestingly, one-third or more of the registries list several fields that the ISCTR does not specifically recommend. This seems to reflect a certain level of agreement among the managers of registries that particular fields

are important. There may be a range of reasons for including these fields. For instance, India had been criticized for the lack of appropriate oversight to ensure the ethical conduct of trials, and therefore CTRI asked trialists for details of the ethics committee even before ISCTR required this information [38,39]. Also, there have been demands from the Cochrane collaboration, and many other individuals and groups, to include several additional items in the ISCTR list, which WHO has not agreed to. It is alleged that the recommended list is closer to what industry demanded [40]. As such, although ISCTR may not list every field that many people believed to be essential, managers of particular registries may have chosen to list some of them.

We explored some of these Extra fields in greater detail below.

#### **(iv) Whether PI name is compulsory**

For the sake of accountability it is important that the field 'PI name' is compulsory [25,41]. Although we have assessed Contact for Scientific Queries as a TRDS field, we have not assumed that this person is the PI, and therefore have separately looked into whether the PI name is compulsory. In seven registries (ANZCTR, ChiCTR, CRIS, DRKS, EU-CTR, PACTR and RPCEC) it is so, and they received the highest score of 5. Several have either not made it clear whether the scientific contact is the PI, or have a separate field for the PI name but have not stated whether it is compulsory. They each received a score of 2. Three registries (CTG, CTRI and ReBEC) have marked this field as voluntary, and received 0. The median score was 2.

WHO documents [25,41] have contradictory information on the issue of PI name and Contact for Scientific Queries. They require that the PI's name, title and email ID be provided, but state that this should be a functional name, not a personal one. ISCTR states that the PI is the Contact for Scientific Queries, unless the PI delegates this task to somebody else. If the PI

name is compulsory – and preferably recorded in a fixed format [42] – then this information will enable researchers to quantify the number of unique PIs in a country, ask whether a PI  
414 has been taking on too many trials, and perform other analyses. Therefore we commend the registries that have made this field compulsory.

#### 417 **(v) Audit trail**

ISCTR requires that the audit trail of each record should be publicly available and so we have examined the presence and usefulness of this feature. Six registries (CRIS, CTG, DRKS,  
420 IRCT, PACTR and RPCEC) have the option of comparing two versions of the trial record and received the maximum score of 3; two (ISRCTN and SLCTR) have highlighted the changes made to a trial record, and got 2; four (ANZCTR, ChiCTR, CTRI and LBCTR) have  
423 a basic form of an audit trail and got 1; and six of the PR+ do not provide any audit trail and got 0. The median score was 1. It is clear that most registries do not have an ideal audit trail.

426 The information pertaining to the following two features is present in the Extra fields, either as a separate field in the Detailed view, or marked with a flag in the Brief View. Hence we have not scored these features separately.

429

#### **(vi) Flagging retrospective or prospective registration status of a trial**

Prospective registration is crucial to prevent unrecorded ‘outcome switching’, which creates a  
432 bias in the medical evidence base [28]. Nevertheless, it has been argued that (i) it is a duty to trial participants to register each trial, and subsequently publish the results, and (ii) not registering a trial could lead to its loss from the documented universe of trials [43].

435 As such, retrospective registration is better than non-registration, and therefore many PR+ permit it. We have documented this in Table 1.

438 Users may have more confidence in the results of a prospectively than a retrospectively  
registered trial. Further, flagging retrospectively registered ones may shame the registrants  
into registering prospectively in future [14]. Accordingly, we have analysed whether PR+  
441 highlight the registration status of trials and flag retrospectively registered ones.  
Over half of the PR+ do so.

#### 444 **(vii) The reason for the termination of a trial, if applicable**

It is important to know why a study was terminated as it provides economic, ethical and  
scientific insights that can help improve ongoing or upcoming clinical trials [44]. Our  
447 analysis showed that only eight registries provide this information at all, and only three  
provide drop-down menus of reasons for termination (Table S5). Researchers who have  
studied the leading causes of trial termination have suggested that the cause should be  
450 selected from a fixed set of options [45].

### **3. Other sections:**

453 Finally, we examined three features that map to other sections of the ISCTR, as follows: (a)  
Health condition, (b) the presence of a Secure Sockets Layer (SSL) certificate and (c)  
Documentation.

456

#### **(i) Health condition**

First, the issue of classifying health conditions, which maps to Data Interchange Standards.  
459 We find that only half the PR+ provide drop-down menus for this field, and they received the  
highest score of 5. Five registries (ChiCTR, CTG, IRCT, REPEC and TCTR) recommend the  
use of standardized vocabulary, and received 3. Four registries (ISRCTN, NTR, RPCEC and  
462 SLCTR) that do not provide such options, and have a free text field for health condition,  
received 1. The median score was 4.

465 Comparisons across registries are easier if each one uses a controlled vocabulary, and in  
particular one that maps to a widely-used metathesaurus [46] as recommended in ISCTR  
[25]. It is therefore preferable that the health condition be selected from a fixed set of options.

468

### **(ii) The presence of an SSL certificate**

Second, the security of the website. In the Technical Capacity section, ISCTR requires that  
471 each registry have adequate protection against the corruption or loss of data. We have  
assessed something basic, that is whether the website is secured with an SSL certificate, as is  
evident when a website URL contains 'https'. We find that only 12 of the PR+ websites have  
474 this certification, and each received a score of 5. The remaining six registries (ChiCTR,  
CTRI, ISRCTN, LBCTR, ReBEC and RPCEC) have URLs with an 'http', and received 0.  
The median score was 5.

477

The SSL certificate is an important tool to safeguard data of the registry and that of its users,  
and Google currently marks all sites without it as insecure [47]. As such, it is also a sign of  
480 credibility for a user who may hesitate to access a site that lacks a security certificate.

### **(iii) Documentation**

483 Third, the issue of documentation. Various documents help users to understand the processes  
of a registry, or the data it hosts. Only half the PR+ provide all the three types of  
documentation we have assessed, and received a score of 3. Six registries (ChiCTR, CRIS,  
486 PACTR, REPEC, RPCEC and SLCTR) have only two types of documents and received 2,  
and one registry (IRCT) displays only a user guide and received a score of 1. Two registries  
(JPRN and NTR) do not provide any documentation, and have received 0. The median score  
489 obtained was 2.5.

492 Although the three documents that we have scored are not explicit requirements of the  
ISCTR, they assist users in registering their trial correctly. As such, this feature maps to the  
Quality and Validity section.

495 In general, we have barely touched upon Quality and Validity, since investigating the  
completeness or quality of the records in the PR+ would be a large exercise in itself. The  
sponsor needs to ensure a high quality trial record, but this may not happen, and various  
498 studies have highlighted deficiencies in the records of different registries [10–13,48]. It is  
also the duty of the managers of the registry to facilitate better quality trial registration, as has  
been recommended by ISCTR. Additionally, for several of the minimum standards  
501 recommended by ISCTR, either it is not possible for us to assess compliance, or the  
requirements do not immediately impact use of the registry data. Therefore we have also  
barely touched upon Unambiguous Identification (although Secondary identifying numbers, a  
504 field in TRDS, also maps to this section), Technical Capacity, and Data Interchange  
Standards. Further, we have not touched upon the sections (i) Administration and  
Governance, and (ii) Partner Registries.

507  
Overall, as derived from an assessment of 14 features described above, the maximum score  
that any registry obtained was 94 points (Table 3). The PR+ received scores ranging from  
510 27% (NTR) to 80% (CTG) of the maximum, with an average of 52%. Despite the limited  
nature of our audit, the lowest- and highest-scoring registries received scores that differ by  
over 50%. To the best of our knowledge, this widely divergent quality of the PR+ has not  
513 been documented before.

## **An ideal registry**

We found that the registries show a high degree of variability for a given feature, ranging  
516 from a sophisticated to a routine variation, or its complete absence. We have used the best  
variant of the features analyzed to define an interim ideal registry. In such a registry,

- (i) the total number of trials is displayed on the home page;
- 519 (ii) a search is possible through (a) a basic search function, (b) each of the TRDS fields, and  
(c) a few extra fields;
- (iii) the data download options include a csv, excel, or tsv format, and support automated  
522 bulk downloads;
- (iv) the Brief view is customizable, with 10 or more fields, with text wrapping;
- (v) the Detailed view includes all the TRDS fields;
- 525 (vi) there is clarity on whether or not the scientific contact is the PI;
- (vii) the PI name is compulsory;
- (viii) the reason for the termination of a trial is selected from a drop-down menu of possible  
528 reasons;
- (ix) each trial has an audit trail that enables a comparison of any two versions;
- (x) at the very least, the following documents are provided, in English: (a) a definition of  
531 each field of the record, (b) a list of FAQs, and (c) one or more user guides;
- (xi) the website is secured with an SSL certificate; and
- (xii) the health condition category is chosen from a drop-down menu with a controlled  
534 vocabulary, preferably a widely used one.

The ISCTR recommends several other standard including higher data quality, more complete  
537 records and the reporting of results. Although it is hoped that all registries will implement all  
of these standards in due course, in the interim, registries may wish to implement the list  
above if they have not already done so.

Registries have many users. The scorecard above analyses features that are of interest to the authors and, by extension, possibly to other researchers concerned with the health of the trial ecosystem overall. Other categories of users, such as medical professionals, patients, trial sponsors, policy makers, data scientists and so on, may wish to alter the assessed features, or the scoring, in order to rank the registries according to their priorities. For instance, a data scientist would be very appreciative of ANZCTR, which specifically enables web crawling of its records [49]. Furthermore, the managers of other registries, either public or private, and either based on the data in the PR+ or not, may be interested in the results of this study.

The ongoing Covid-19 pandemic has forcefully brought home the need for high quality trial registries with information that is consistent, comprehensive and available in a user-friendly fashion. Billions of people need to be immediately protected from the virus, and large numbers of drugs and vaccines are in trials. There is world-wide interest in these trials, and information that is being tracked includes what is being trialled; where these trials are taking place; and the results of these trials. Each country needs to take public health decisions, which will evolve as the evidence from trials running in different parts of the world yield results. Public trial registries are one of the fastest ways of communicating these results.

Further, the publicly available, freely accessible information in such registries helps to build trust with the public [26,44]. Covid-19 trials have been among the fastest recruiting ones in history [50,51], and it is possible that the publicly available information in trial registries has helped many of the potential trial participants decide to enrol.

It is not just that everyone is interested in the positive outcomes of trials. For example, an inspection of the CTRI records of hundreds of Covid-19 trials being run in India has thrown up quality issues in almost all of them. Based on negative publicity, the government has taken action in some cases [52].



There is a long history of various stakeholders arguing for the need to improve registries and  
570 the quality of trial registration. Examples include academics and health activists [53–55],  
journals (ICMJE) [56], WHO [41], registry managers [57], funders [58,59] and governments  
[60]. Each of these efforts has led to some improvements in the number and quality of trial  
573 records hosted by registries. However none of them has led to a perfect set of records. It is  
likely that the only way this will be achieved is if all stakeholders continue to apply pressure  
on the registries. Studies such as this one help to highlight deficiencies, which adds to the  
576 other efforts aimed at improving registries. The authors would welcome other researchers’  
efforts to create and update a website that lists the scorecard, with periodic updates. Should  
such a website not be created by any other group, the authors intend to re-evaluate the  
579 registries’ performance on the scorecard every few years.

In summary, to the best of our knowledge, this is the first study undertaking a comparative  
582 analysis of WHO-recognized registries to assess compliance to ISCTR. Our use of a  
scorecard, based on preset criteria, ensured an impartial quantification of the quality of the  
features analyzed across the PR+. As such, even though our study analyzed a limited set of  
585 features, it clearly shows the substantial variation in compliance with the recommended  
minimal standards. Our study would be helpful to researchers who may wish to extend this  
audit and evaluate the completeness of the records or the quality of their data, two other  
588 major issues, in all 18 registries.

This study has a few limitations, as follows: (i) It assesses only some of the many features in  
591 each registry. In particular, it does not evaluate any aspect of trial methodology or results,  
which are crucial portions of such registries. As such, otherwise outstanding registries may  
have fared less well than expected. (ii) We have not evaluated the completeness of any  
594 records or the quality of their data. (iii) Each registry has been evaluated with respect to the

list of fields in a recently registered trial. Earlier records in the same registry may have different content if the required details have changed over time. (iv) We have primarily focused on information that is available in English and may have missed important content in other languages. (v) Although applied systematically, the absolute values of the scores are arbitrary

597

600

## Conclusions

Over the years, CTG has received most of the attention of those interested in the accessibility and integrity of the data in public trial registries. As noted above, 41% of the records are held in the other PR+, and need to be examined as well. We have identified the best variations of several features that have already been implemented by one or more of these registries, and which serve as pointers on how the others may improve. Running a registry is not merely a bureaucratic task, but is part of a mission to safeguard patients' lives, and the ethics and science of medicine. We hope that our analysis is of some assistance in this.

603

606

609

## References

1. Dickersin K, Rennie D. Registering clinical trials. *JAMA*. 2003 Jul 23;290(4):516-23. doi: 10.1001/jama.290.4.516. PMID: 12876095.
2. Krleza-Jerić K. Clinical trial registration: the differing views of industry, the WHO, and the Ottawa Group. *PLoS Med*. 2005 Nov;2(11):e378. doi: 10.1371/journal.pmed.0020378. Epub 2005 Oct 18. PMID: 16221000; PMCID: PMC1255765.
3. Lundh A, Krogsbøll LT, Gøtzsche PC. Access to data in industry-sponsored trials. *Lancet*. 2011 Dec 10;378(9808):1995-1996. doi: 10.1016/S0140-6736(11)61871-0. PMID: 22153200.
4. Lemmens T and Bouchard R, *Mandatory Clinical Trial Registration: Rebuilding Public Trust in Medical Research (2007)*. GLOBAL FORUM UPDATE ON RESEARCH FOR HEALTH, Vol. 4: Equitable Access: Research Challenges for Health in Developing Countries, pp. 40-46, London: Pro-Book Publishing, 2007. Available at SSRN: <https://ssrn.com/abstract=1083565>.
5. Miller JE, Ross JS, Moch KI, Caplan AL. Characterizing expanded access and compassionate use programs for experimental drugs. *BMC Res Notes*. 2017 Jul

- 633 28;10(1):350. doi: 10.1186/s13104-017-2687-5. PMID: 28754150; PMCID:  
PMC5534121.
- 636 6. Askie LM, Hunter KE, Berber S, Langford A, Tan-Koay AG, Vu T et al. The clinical  
trials landscape in Australia 2006–2015. Sydney: Australian New Zealand Clinical  
Trials Registry 2017.
- 639 7. Li MD, Atkins H, Bubela T. The global landscape of stem cell clinical trials. *Regen  
Med.* 2014 Jan;9(1):27-39. doi: 10.2217/rme.13.80. Epub 2013 Nov 18. PMID:  
642 24236476.
- 645 8. Tharyan P, George AT, Kirubakaran R, Barnabas JP. Reporting of methods was better  
in the Clinical Trials Registry-India than in Indian journal publications. *J Clin  
Epidemiol.* 2013 Jan;66(1):10-22. doi: 10.1016/j.jclinepi.2011.11.011. Epub 2012  
Mar 27. PMID: 22459428.
- 648 9. Yasmeen A. Infant milk: Nestle’s clinical trial under scanner. *The Hindu.* 3 Aug  
2019. Available: [https://www.thehindu.com/news/national/infant-milk-nestles-  
651 clinical-trial-under-scanner/article28809296.ece](https://www.thehindu.com/news/national/infant-milk-nestles-clinical-trial-under-scanner/article28809296.ece). Accessed 25 Sep 2020.
- 654 10. Viergever RF, Ghersi D. The quality of registration of clinical trials. *PLoS One.* 2011  
Feb 24;6(2):e14701. doi: 10.1371/journal.pone.0014701. PMID: 21383991; PMCID:  
PMC3044717.
- 657 11. Viergever RF, Karam G, Reis A, Ghersi D. The quality of registration of clinical  
trials: still a problem. *PLoS One.* 2014 Jan 10;9(1):e84727. doi:  
10.1371/journal.pone.0084727. PMID: 24427293; PMCID: PMC3888400.
- 660 12. Chaturvedi N, Mehrotra B, Kumari S, Gupta S, Subramanya HS, Saberwal G. Some  
data quality issues at ClinicalTrials.gov. *Trials.* 2019 Jun 24;20(1):378. doi:  
663 10.1186/s13063-019-3408-2. PMID: 31234923; PMCID: PMC6591874.
- 666 13. Pillamarapu M, Mohan A, Saberwal G. An analysis of deficiencies in the data of  
interventional drug trials registered with Clinical Trials Registry - India. *Trials.* 2019  
Aug 28;20(1):535. doi: 10.1186/s13063-019-3592-0. PMID: 31455366; PMCID:  
PMC6712861.
- 669 14. Fleminger J, Goldacre B. Prevalence of clinical trial status discrepancies: A cross-  
sectional study of 10,492 trials registered on both ClinicalTrials.gov and the European  
672 Union Clinical Trials Register. *PLoS One.* 2018 Mar 7;13(3):e0193088. doi:  
10.1371/journal.pone.0193088. PMID: 29513684; PMCID: PMC5841737.
- 675 15. Zarin DA, Tse T, Williams RJ, Carr S. Trial Reporting in ClinicalTrials.gov - The  
Final Rule. *N Engl J Med.* 2016 Nov 17;375(20):1998-2004. doi:  
10.1056/NEJMSr1611785. Epub 2016 Sep 16. PMID: 27635471; PMCID:  
678 PMC5225905.
- 681 16. Kumari S, Mohan A, Saberwal G. Hidden duplicates: 10s or 100s of Indian trials,  
registered with ClinicalTrials.gov, have not been registered in India, as required by  
law. *PLoS One.* 2020 Jun 19;15(6):e0234925. doi: 10.1371/journal.pone.0234925.  
PMID: 32559240; PMCID: PMC7304601.

- 684 17. Alarcon-Ruiz CA, Roque-Roque JS, Heredia P, Gómez-Briceño AR, Quispe AM.  
Twenty-two years' experience registering trials in a low-middle income country: The  
687 Peruvian Clinical Trial Registry. *J Evid Based Med.* 2019 Aug;12(3):187-193. doi:  
10.1111/jebm.12354. Epub 2019 Jun 18. PMID: 31215157.
- 690 18. Ranawaka UK, de Abrew A, Wimalachandra M, Samaranayake N, Goonaratna C.  
Ten years of clinical trial registration in a resource-limited setting: Experience of the  
693 Sri Lanka clinical trials registry. *J Evid Based Med.* 2018 Feb;11(1):46-50. doi:  
10.1111/jebm.12284. Epub 2018 Jan 11. PMID: 29322622.
- 696 19. Krumholz HM, Ross JS, Presler AH, Egilman DS. What have we learnt from Vioxx?  
*BMJ.* 2007 Jan 20;334(7585):120-3. doi: 10.1136/bmj.39024.487720.68. PMID:  
17235089; PMCID: PMC1779871.
- 699 20. Jureidini JN, McHenry LB, Mansfield PR. Clinical trials and drug promotion:  
Selective reporting of study 329. *International Journal of Risk & Safety in Medicine.*  
2008;20: 73–81. doi:10.3233/JRS-2008-0426
- 702 21. WHO Technical Consultation on Clinical Trials Registration Standards. Geneva:  
World Health organization. 25-27 April 2005; Available:  
705 [https://www.who.int/ictrp/news/ictrp\\_meeting\\_april2005\\_conclusions.pdf](https://www.who.int/ictrp/news/ictrp_meeting_april2005_conclusions.pdf)
- 708 22. ICTRP Search Portal [Internet]. [cited 21 Mar 2020]. Available:  
<http://apps.who.int/trialsearch/>
- 711 23. WHO | The WHO Registry Network [Internet]. [cited 1 Oct 2020]. Available:  
<https://www.who.int/ictrp/network/en/>
- 714 24. WHO | Partner Registries [Internet]. [cited 1 Oct 2020]. Available:  
<https://www.who.int/ictrp/network/partner/en/>
- 717 25. International Standards for Clinical Trial Registries – Version 3.0. Geneva: World  
Health Organization; 2018. License: CC BY-NC-SA 3.0 IGO
- 720 26. The-Clinical-Trial-Registry-of-the-Future-Proposal.pdf [Internet]. [cited 2020 Mar  
22]. Available from: [http://www.transceleratebiopharmainc.com/wp-](http://www.transceleratebiopharmainc.com/wp-content/uploads/2017/11/The-Clinical-Trial-Registry-of-the-Future-Proposal.pdf)  
723 [content/uploads/2017/11/The-Clinical-Trial-Registry-of-the-Future-Proposal.pdf](http://www.transceleratebiopharmainc.com/wp-content/uploads/2017/11/The-Clinical-Trial-Registry-of-the-Future-Proposal.pdf)
- 726 27. WHO ICTRP Registry Network Meeting Summary Report. Geneva: World Health  
Organization; 2015. Available:  
729 [https://www.who.int/ictrp/news/ICTRP\\_registry\\_network\\_meeting\\_report\\_2015\\_web](https://www.who.int/ictrp/news/ICTRP_registry_network_meeting_report_2015_web.pdf?ua=1)  
[.pdf?ua=1](https://www.who.int/ictrp/news/ICTRP_registry_network_meeting_report_2015_web.pdf?ua=1)
- 732 28. Moja LP, Moschetti I, Nurbhai M, Compagnoni A, Liberati A, Grimshaw JM, Chan  
AW, Dickersin K, Krleza-Jeric K, Moher D, Sim I, Volmink J. Compliance of clinical  
trial registries with the World Health Organization minimum data set: a survey. *Trials.*  
2009 Jul 22;10:56. doi: 10.1186/1745-6215-10-56. PMID: 19624821; PMCID:  
PMC2734552.
- 732 29. Ogino D, Takahashi K, Sato H. Characteristics of clinical trial websites: information  
distribution between ClinicalTrials.gov and 13 primary registries in the WHO registry  
network. *Trials.* 2014 Nov 5;15:428. doi: 10.1186/1745-6215-15-428. PMID:  
25373358; PMCID: PMC4234832.

- 735 30. Miller JE, Wilenzick M, Ritcey N, Ross JS, Mello MM. Measuring clinical trial  
transparency: an empirical analysis of newly approved drugs and large pharmaceutical  
738 companies. *BMJ Open*. 2017 Dec 5;7(12):e017917. doi: 10.1136/bmjopen-2017-  
017917. PMID: 29208616; PMCID: PMC5728266.
- 741 31. Goldacre B. How to get all trials reported: audit, better data, and individual  
accountability. *PLoS Med*. 2015 Apr 14;12(4):e1001821. doi:  
10.1371/journal.pmed.1001821. PMID: 25874719; PMCID: PMC4396123.
- 744 32. Our scoring method. [Internet]. [cited 21 Mar 2020]. Available:  
<http://policyaudit.alltrials.net/our-scoring-method/>
- 747 33. Goldacre B, Gray J. OpenTrials: towards a collaborative open database of all  
available information on all clinical trials. *Trials*. 2016 Apr 8;17:164. doi:  
10.1186/s13063-016-1290-8. PMID: 27056367; PMCID: PMC4825083.
- 750 34. Azar M, Riehm KE, Saadat N, Sanchez T, Chiovitti M, Qi L, Rice DB, Levis B,  
Fedoruk C, Levis AW, Kloda LA, Kimmelman J, Benedetti A, Thombs BD.  
753 Evaluation of Journal Registration Policies and Prospective Registration of  
Randomized Clinical Trials of Nonregulated Health Care Interventions. *JAMA Intern  
Med*. 2019 May 1;179(5):624-632. doi: 10.1001/jamainternmed.2018.8009. PMID:  
756 30855655; PMCID: PMC6503638.
- 759 35. Miller J, Ross JS, Wilenzick M, Mello MM. Sharing of clinical trial data and results  
reporting practices among large pharmaceutical companies: cross sectional descriptive  
study and pilot of a tool to improve company practices. *BMJ*. 2019 Jul 10;366:l4217.  
doi: 10.1136/bmj.l4217. PMID: 31292127; PMCID: PMC6614834.
- 762 36. Jones CW, Safferman MR, Adams AC, Platts-Mills TF. Discrepancies between  
ClinicalTrials.gov recruitment status and actual trial status: a cross-sectional analysis.  
765 *BMJ Open*. 2017 Oct 11;7(10):e017719. doi: 10.1136/bmjopen-2017-017719. PMID:  
29025842; PMCID: PMC5652524.
- 768 37. Chan AW, Song F, Vickers A, Jefferson T, Dickersin K, Gøtzsche PC, Krumholz  
HM, Gherzi D, van der Worp HB. Increasing value and reducing waste: addressing  
771 inaccessible research. *Lancet*. 2014 Jan 18;383(9913):257-66. doi: 10.1016/S0140-  
6736(13)62296-5. Epub 2014 Jan 8. PMID: 24411650; PMCID: PMC4533904.
- 774 38. Tharyan P. Ethics committees and clinical trials registration in India: opportunities,  
obligations, challenges and solutions. *Indian J Med Ethics*. 2007 Oct-Dec;4(4):168-9.  
doi: 10.20529/IJME.2007.066. PMID: 18630235.
- 777 39. Pandey A, Aggarwal A, Seth S, Maulik M, Bano R, Juneja A. Clinical Trials  
Registry--India: redefining the conduct of clinical trials. *Indian J Cancer*. 2008 Jul-  
780 Sep;45(3):79-82. doi: 10.4103/0019-509x.44060. PMID: 19018108.
- 783 40. Krleza-Jerić K. Clinical trial registration: the differing views of industry, the WHO,  
and the Ottawa Group. *PLoS Med*. 2005 Nov;2(11):e378. doi:  
10.1371/journal.pmed.0020378. Epub 2005 Oct 18. PMID: 16221000; PMCID:  
PMC1255765.
- 786 41. WHO | WHO Data Set. In: WHO [Internet]. [cited 16 May 2019]. Available:  
<http://www.who.int/ictrp/network/trds/en/>

- 789 42. Potthast R, Vervölgyi V, McGauran N, Kerekes MF, Wieseler B, Kaiser T. Impact of  
inclusion of industry trial results registries as an information source for systematic  
792 reviews. PLoS One. 2014 Apr 17;9(4):e92067. doi: 10.1371/journal.pone.0092067.  
PMID: 24743113; PMCID: PMC3990559.
- 795 43. Harriman SL, Patel J. When are clinical trials registered? An analysis of prospective  
versus retrospective registration. Trials. 2016 Apr 15;17:187. doi: 10.1186/s13063-  
016-1310-8. PMID: 27079379; PMCID: PMC4832501.
- 798 44. Committee on Clinical Trial Registries; Board on Health Sciences Policy; Institute of  
Medicine. Developing a National Registry of Pharmacologic and Biologic Clinical  
Trials: Workshop Report. Washington (DC): National Academies Press (US); 2006.  
801 PMID: 26740992.
- 804 45. Williams RJ, Tse T, DiPiazza K, Zarin DA. Terminated Trials in the  
ClinicalTrials.gov Results Database: Evaluation of Availability of Primary Outcome  
Data and Reasons for Termination. PLoS One. 2015 May 26;10(5):e0127242. doi:  
807 10.1371/journal.pone.0127242. PMID: 26011295; PMCID: PMC4444136.
- 810 46. Metathesaurus. [cited 22 Mar 2020]. Available:  
[https://www.nlm.nih.gov/research/umls/knowledge\\_sources/metathesaurus/index.html](https://www.nlm.nih.gov/research/umls/knowledge_sources/metathesaurus/index.html)
- 813 47. Council Post: Why An SSL Certificate Is Important For Your Company Website.  
[Internet]. [cited 25 Sep 2020]. Available:  
[https://www.forbes.com/sites/forbestechcouncil/2018/05/18/why-an-ssl-certificate-is-  
important-for-your-company-website/#2181c3fb1dc3](https://www.forbes.com/sites/forbestechcouncil/2018/05/18/why-an-ssl-certificate-is-important-for-your-company-website/#2181c3fb1dc3)
- 816 48. Yadav P, Jaykaran, Chaudhari M, Saxena D, Kantharia ND. Clinical trials registered  
in clinical trial registry of India: A survey. J Pharmacol Pharmacother. 2011  
819 Oct;2(4):289-92. doi: 10.4103/0976-500X.85953. PMID: 22025862; PMCID:  
PMC3198529.
- 822 49. ANZCTR [Internet]. [cited 25 Sep 2020]. Available:  
<https://www.anzctr.org.au/crawl.aspx>
- 825 50. Oxford recruits 2,700 virus patients for fast-growing drugs trial. Financial Times.  
[cited 25 Sep 2020]. Available: [https://www.ft.com/content/f4e3055e-72e2-459d-  
ba66-05af7d2c8915](https://www.ft.com/content/f4e3055e-72e2-459d-ba66-05af7d2c8915)
- 828 51. Clinical trials for a Covid-19 vaccine to begin in Rochester. WHAM. [cited 25 Sep  
2020]. Available: [https://13wham.com/news/local/clinical-trials-for-a-covid-19-  
vaccine-to-begin-in-rochester](https://13wham.com/news/local/clinical-trials-for-a-covid-19-vaccine-to-begin-in-rochester)
- 831 52. COVID-19: Hundreds Of Clinical Trials Under Way In India, Many Lack Rigour, Say  
Experts. [cited 25 Sep 2020]. Available: [https://www.indiaspend.com/covid-19-  
hundreds-of-clinical-trials-under-way-in-india-many-lack-rigour-say-experts/](https://www.indiaspend.com/covid-19-hundreds-of-clinical-trials-under-way-in-india-many-lack-rigour-say-experts/)
- 834 53. Krleza-Jerić K, Chan AW, Dickersin K, Sim I, Grimshaw J, Gluud C. Principles for  
international registration of protocol information and results from human trials of  
health related interventions: Ottawa statement (part 1). BMJ. 2005 Apr  
837 23;330(7497):956-8. doi: 10.1136/bmj.330.7497.956. Erratum in: BMJ. 2005 May  
28;330(7502):1258. PMID: 15845980; PMCID: PMC556346.

- 840 54. AllTrials. All Trials Registered. All Results Reported. In: AllTrials [Internet]. [cited  
16 May 2019]. Available: <http://www.alltrials.net/>
- 843 55. Miller JE, Korn D, Ross JS. Clinical trial registration, reporting, publication and  
FDAAA compliance: a cross-sectional analysis and ranking of new drugs approved  
by the FDA in 2012. *BMJ Open*. 2015 Nov 12;5(11):e009758. doi: 10.1136/bmjopen-  
2015-009758. PMID: 26563214; PMCID: PMC4654354.
- 846 56. ICMJE | Recommendations | Clinical Trials. [cited 10 Jun 2019]. Available:  
849 [http://www.icmje.org/recommendations/browse/publishing-and-editorial-  
issues/clinical-trial-registration.html](http://www.icmje.org/recommendations/browse/publishing-and-editorial-issues/clinical-trial-registration.html)
- 852 57. Zarin DA, Tse T, Williams RJ, Rajakannan T. Update on Trial Registration 11 Years  
after the ICMJE Policy Was Established. *N Engl J Med*. 2017 Jan 26;376(4):383-391.  
doi: 10.1056/NEJMsrl601330. PMID: 28121511; PMCID: PMC5813248.
- 855 58. Clinical trials policy – Grant funding | Wellcome. [cited 30 Sep 2020]. Available:  
<https://wellcome.org/grant-funding/guidance/clinical-trials-policy>
59. Publishing Policies | Gates Open Research. [cited 30 Sep 2020]. Available:  
<https://gatesopenresearch.org/about/policies#trialreg>
- 858 60. FDAAA 801 and the Final Rule - ClinicalTrials.gov. [cited 25 Sep 2020]. Available:  
<https://clinicaltrials.gov/ct2/manage-recs/fdaaa>

## 861 **Supporting information**

**S1 Table. Mapping to ISCTR.** The 14 features analyzed in this study map to the following nine sections of ISCTR: (i) Content, (ii) Quality and Validity, (iii) Accessibility, (iv) Unambiguous Identification, (v) Technical Capacity, (vi) Administration and Governance, (vii) The 24-field TRDS, (viii) Partner Registries, and (ix) Data Interchange Standards.

**S2 Table. Data on six aspects of each registry.** (a) Total number of trials in the registry, (b) Existence of a basic search function, (c and d) Advanced search function – TRDS fields and Extra fields, and (e) Data download options.

**S3 Table. The list of the TRDS fields that are present in the Brief view and the Detailed view.** The presence or absence of the field is indicated by a 1 or 0, respectively. The number of the sample trial used for each registry is also provided.

**S4 Table. For each registry, a listing of the Extra fields in the Brief and Detailed views.**

**S5 Table. Data on multiple aspects of each registry.** (a) whether the PI name is compulsory; (b) reason for the termination of a trial, and whether there is a drop-down menu of reasons; (c) audit trail; (d) health condition (e) SSL certificate, and (f) documentation.



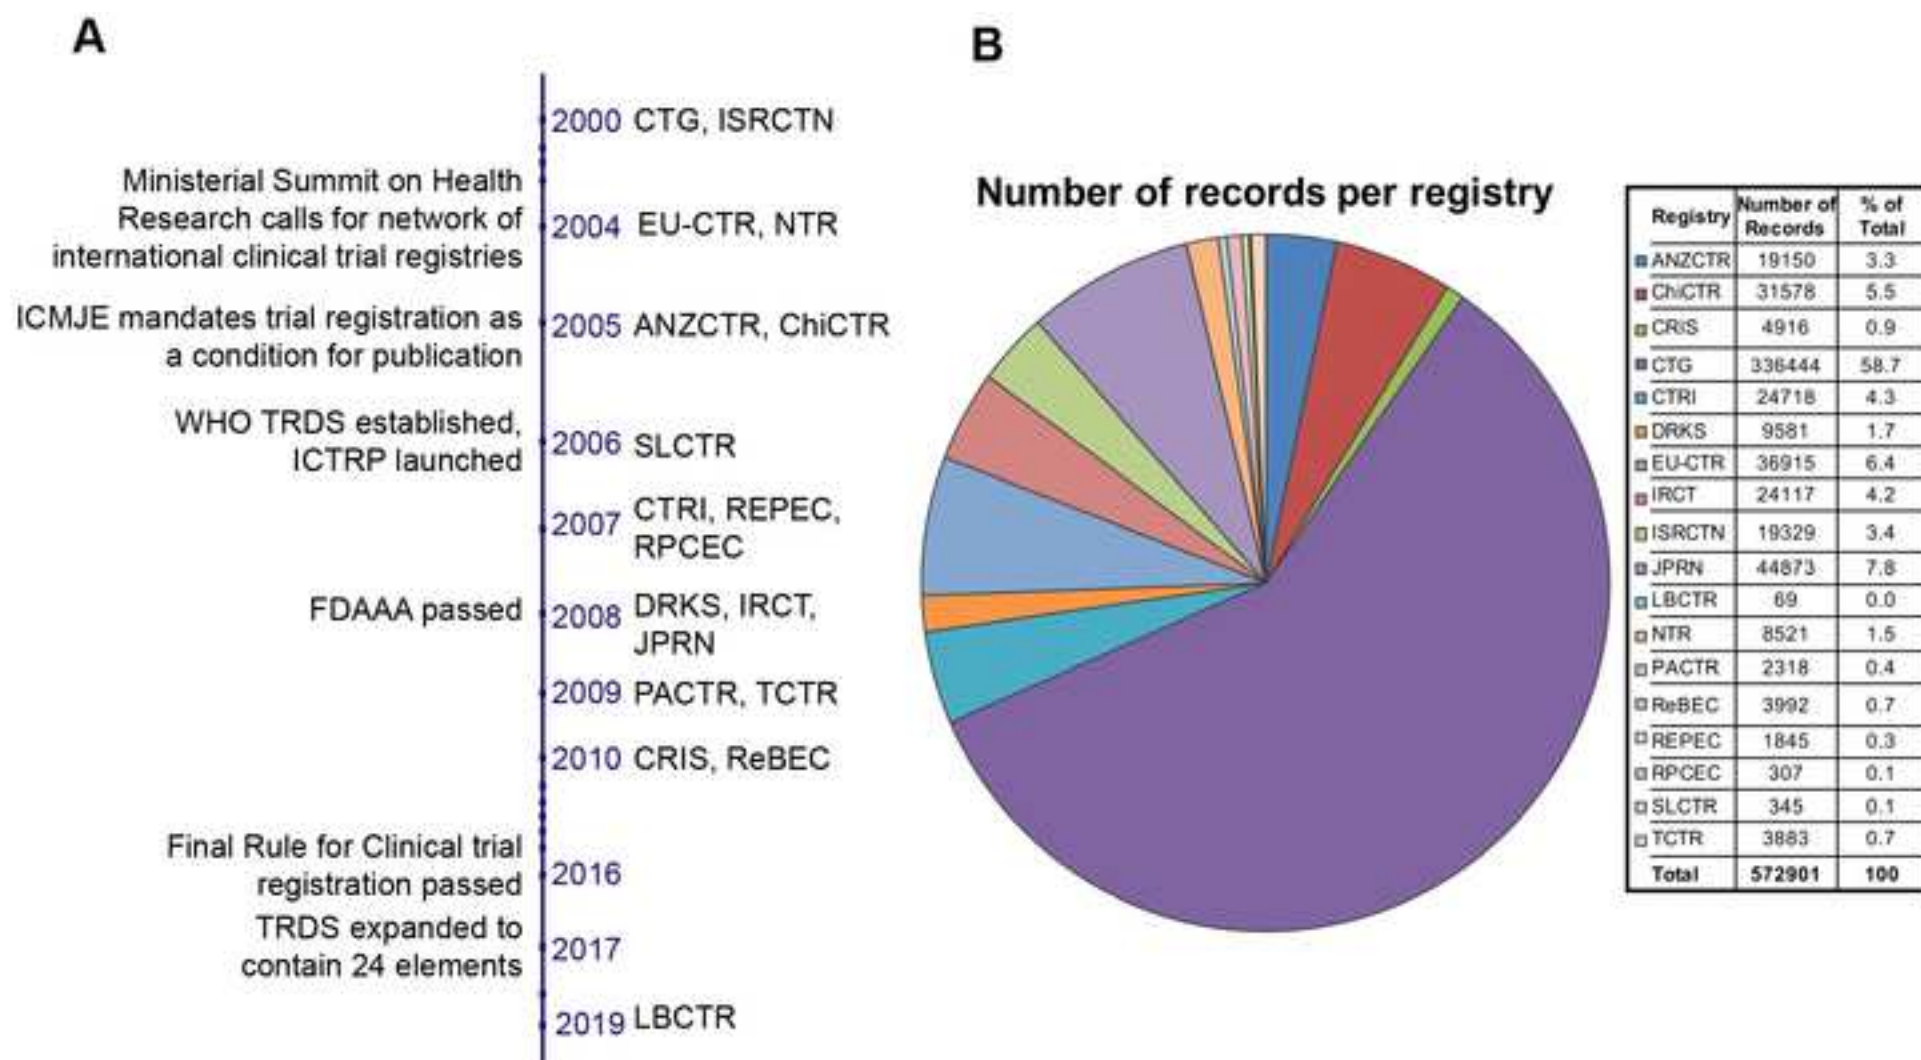



Click here to access/download  
**Supporting Information**  
S1 Table.xlsx





Click here to access/download  
**Supporting Information**  
S2 Table.xlsx





Click here to access/download  
**Supporting Information**  
S3 Table.xls





Click here to access/download  
**Supporting Information**  
S4 Table.xlsx





Click here to access/download  
**Supporting Information**  
S5 Table.xlsx



**A comparative analysis of important public clinical trial registries, and a proposal for an interim ideal one [TRACK CHANGES]**

3

Nisha Venugopal and Gayatri Saberwal\*

6

Emails: nisha.venugopal2015@gmail.com, gayatri@ibab.ac.in

9

Authors' affiliation:

Institute of Bioinformatics and Applied Biotechnology

12

Biotech Park, Electronics City Phase 1

Bengaluru 560100

Karnataka

15

India

18

\*Corresponding author:

E-mail: gayatri@ibab.ac.in

21

Keywords: Clinical trial registry, Primary registry, ICTRP, ClinicalTrials.gov, Ethics,

24 Regulatory issues

## Abstract

### 27 Background

It is an ethical and scientific obligation to register each clinical trial, and report its results, accurately, comprehensively and on time. The WHO recognizes 17 public registries as

30 Primary Registries, ~~and it~~ has also introduced a set of minimal standards in the  
33 (International Standards for Clinical Trial Registries, ~~or~~ (ISCTR) that ~~these primary~~  
registries need to implement. ~~These standards are categorized into nine sections — Content,~~  
Quality and Validity, Accessibility, Unambiguous Identification, Technical Capacity,  
Administration and Governance, the Trial Registration Data Set (TRDS), Partner registries  
and Data Interchange Standards. This study compared ~~these~~ the WHO's primary registries,  
36 and the US's ClinicalTrials.gov, to examine the implementation of ISCTR, with the aim of  
defining features of an interim ideal registry.

39

### ~~Methods and Findings~~

### 42 Methods and Findings

The websites of the 18 registries were evaluated for ~~147~~ features that map to one or more of  
the nine sections of ISCTR, and assigned scores for their ~~version~~ variations of ~~14~~ of these  
45 features. The assessed features include the nature of the content; the number and nature of  
fields to conduct a search; data download formats; the nature of the audit trail; the health  
condition category; the documentation available on a registry website; and so on. Overall, the

2



48 registries received between 27% and 80% of the maximum score of 94. The results from our  
analysis were used to define a set of features of an interim ideal registry. ~~These include the  
51 number and nature of fields to conduct a search; data download formats; the nature of the  
audit trail; and the health condition category. The main limitations of the study are that (i) it  
does not assess all of the recommendations of the ISCTR, and (ii) although applied  
systematically, the absolute values of the scores are arbitrary.~~

54

## Conclusions

To the best of our knowledge, this is the first study to quantify the widely divergent quality of  
57 the primary registries' compliance with the ISCTR. Even with this limited assessment, it is  
clear that some of the registries have much work to do, although a mere dozen improvements  
would significantly improve them. ~~Our study would be helpful to researchers who may wish  
60 to extend this audit and evaluate the completeness of the records or the quality of their data,  
two other major issues, in all 18 registries.~~

## 63 Introduction

The first two calls for clinical trial registries were made in the 1970s [1]. One aimed to  
enhance the enrollment of patients in ongoing trials, and the other to reduce the possibility of  
66 bias in the subsequent reporting of trial results, caused by the selective publication of those  
with positive outcomes. Since the year 2000, trial registries have proliferated. Nevertheless, it  
has been a long and sustained battle by many stakeholders – activists, journals, researchers,  
69 funders, governments and the World Health Organization (WHO) – to ensure that large  
numbers of trials are registered [2–4]. Although the initial two aims for setting up registries  
continue to be among the most important uses of such databases, researchers have utilized the  
72 data in at least a dozen other ways, such as (i) analyzing the conditions, the medical  
interventions, the sponsors and so on of Expanded Access Studies registered in the United

States (US) [5]; (ii) identifying the fraction of trials that have run in the country, that had industry involvement [6]; (iii) conducting a geo-temporal analysis of the trials of novel stem cell therapies [7]; (iv) obtaining information about a trial that was not reported in the subsequent publication [8]; and (v) identifying trials being run in contravention to the law [9]. Given these numerous and diverse purposes, not initially envisaged, it is even more important that all trials are registered and reported in a timely fashion, and that all the data in each record is complete, reliable and readily accessible. In view of this, the quality of data in the databases has long been the subject of analysis and comment. ~~T[12,19-25]~~ these include (a) analyses of the quality of registration and missing information in trial records [10-13], (b) studies on the discrepancies in trial status for trials that are registered in more than one registry [14], and (c) reports on the phenomenon of hidden duplicates [15,16]. Other studies have looked into the challenges faced, and advances made by individual registries [17,18]. ~~The WHO's International Clinical Trials Registry Platform (ICTRP) initiative was designed Set up to facilitate access to clinical trial information around the world(19), the WHO's International Clinical Trials Registry Platform (ICTRP) initiative recognizes 17 registries as Primary Registries (PRs). Although ClinicalTrials.gov (CTG), of the United States (US), is not one of them, it is the oldest, and by far the largest, public registry, and is considered a data provider to ICTRP. The platform enables a search for trials in all 18 registries [26]. In this study, we have analyzed all of them, and refer to them, collectively, as Primary Registries(+), or PR+.~~

~~WHO's International Standards for Clinical Trial Registries (ISCTR) (20) lists the minimum, and sometimes ideal, standards that PRs should adopt to ensure a basic quality of data and accessibility. These standards are in nine sections.~~

~~Certain high profile scandals [19,20] resulted in numerous calls to increase transparency in clinical trials and to improve the public's trust in the trials enterprise. Following the Ministerial Summit on Health Research that took place in Mexico City in November 2004,~~

102 the WHO launched the International Clinical Trials Registry Platform (ICTRP) initiative in 2006- [21].

105 The ICTRP enables a single point of access to information regarding trials within its registry network [22], which hosts trial records from around the world. The network consists of (i) Primary Registries (PRs), (ii) Data providers, and (iii) Partner registries [23]. There are currently 17 PRs. The Data providers include the PRs and ClinicalTrials.gov (CTG), of the  
108 United States (US). All data providers need to fulfil the same criteria in terms of data collection and management. The two partner registries (i) are not required to fulfil the criteria that PRs need to; (ii) need to be affiliated with one of the PRs; and (iii) cannot directly feed  
111 data into the ICTRP [24]. Therefore, we have not included the these two registries in our study. We have analyzed the 17 PRs, and CTG, and refer to them, collectively, as Primary Registries Plus, or PR+.

114 The WHO also developed the International Standards for Clinical Trial Registries (ISCTR) [25], which lists the minimum, and sometimes ideal, standards that PRs should adopt to  
117 ensure a basic quality of data and accessibility. These standards are in nine sections — Content; Quality and Validity; Accessibility; Unambiguous Identification; Technical Capacity; Administration and Governance; the 24-field Trial Registration Data Set (TRDS);  
120 Partner Registries; and Data Interchange Standards. Although, ICTRP stipulates that non-compliance with these standards can result in revoking of Primary Registry status, we are  
123 unaware of any case where this has happened.

126 It is known that users trust public registries more than those created by companies or patient groups [26]. Also, public registries are often the primary sources on which other databases are built [26]. It follows that the information in each one should be comprehensive, high quality and available in a user-friendly fashion. Accordingly, there have been calls for (i) a

129 comparison of such registries, to help develop suitable standards [25], and (ii) ways to  
improve the accessibility and content of the PR+ [27]. However, several years ago it was  
shown that there had been non-compliance with the WHO minimal dataset [28], and non-  
optimal website functionality and user experience[10,11,29]. Since across-the-board  
132 improvements have not taken place, this issue needs to be reiterated. However instead of  
undertaking a purely qualitative assessment, we drew inspiration from other researchers’  
scorecards. These scorecards have either been developed [30–33] or proposed [34,35] to track  
135 whether trialists register their studies and report the results accurately, comprehensively and  
on time. Accordingly, we developed one to assess the PR+.

138 ~~We wished to undertake a comparative assessment of the PR+, to assess their~~  
~~implementation of ISCTR. In order to do so, W~~we have developed the Registries’  
Comparative Scorecard (the Scorecard) which rates the PR+ on certain features that map to  
141 ~~various different~~ sections of the ISCTR (S1 Table). We ~~end by defining then define~~ an  
interim ‘ideal registry’ based on the best ~~version~~ variations of each feature used by the PR+.  
Until such time as all the registries adopt all the standards recommended by ISCTR, the  
144 adoption of the recommended ~~version~~ variations of each feature would be very helpful for  
users.

## 147 **Methods**

### Data collection

We accessed the websites of the 18 PR+ between July 2019 and April 2020, inclusive. The  
150 registries were evaluated for ~~1417~~ features that map to one or more of the nine sections of  
ISCTR ~~mentioned above, that is (i) Content; (ii) Quality and Validity; (iii) Accessibility; (iv)~~  
~~Unambiguous Identification; (v) Technical Capacity; (vi) Administration and Governance;~~  
153 ~~(vii) The WHO’s mandated 24 field Trial Registration Data Set (TRDS); (viii) Partner~~

~~Registries; and (ix) Data Interchange Standards.~~ The list of features was compiled by the authors based on literature regarding the necessity of higher quality trial registrations [36,37], focusing on the standards listed in ISCTR [25].

All information was obtained from one or more of the following resources within each PR+ website: (i) the general pages of the site; (ii) a randomly chosen, sample interventional trial that was registered after 1 January 2019; (iii) supporting documents, if available; and (iv) where necessary and possible, via a login to do a mock registration. All analyses were performed by one author (NV) and verified by the other (GS), with differences resolved by discussion. ~~Further methodological details and reference URLs are available in the Supplementary files, which are referenced in the Results as relevant.~~

~~The sections below provide further methodological details on the data collection for, and analysis of, each of the features analysed, which have been classified based on the ISCTR section they map to. Reference URLs are available in the Supplementary files, which are referenced in the Results as relevant.~~

## **I. Accessibility features**

We first examined the accessibility of information in the PR+. For this, we assessed several features, as follows:

### **(i) The ease of obtaining the total number of trials hosted by the registry:**

The method of obtaining the total number of trials hosted by each PR+ was determined. Specifically, we documented (a) whether the number was displayed on the home page, (b) if it was available after a search, or (c) whether it had to be calculated based on the number of pages of results. If there was discrepant information at different places on the site, this fact was captured.

183 **(ii) The existence of a Basic search function:**

We examined the presence of the search function using a basic search field.

186 **(iii) and (iv) The number of TRDS fields, and extra fields, that can be used to conduct a search:**

We documented the presence and number of (iii) TRDS fields; and (iv) Extra fields, beyond these 24 TRDS fields, that can be used to conduct a search.

189 **(v) The data download options:**

192 For each PR+, we documented the file formats that are available for data download. We also captured information on whether the data on (a) one, (b) a limited number, (c) multiple, or (d) all search results can be downloaded at a time.

195 **II. Content or compliance with TRDS features**

**(i) TRDS fields and Extra fields:**

198 Each registry provides information about a trial in two different ‘views’. While conducting a search, the user first obtains a list of trials which contains the titles, and may also contain other information. This is called the Brief view. Each trial record is available as a Brief view, and a Detailed view. The fields available in these views in each registry were documented. This information was then mapped to the 24 fields of the WHO TRDS. All additional fields were categorized as ‘Extra fields’.

204  
207 Among the Extra fields, we looked into the following features in further detail.

**(ii) Whether the Principal Investigator (PI) name is compulsory:**

Even though the ISCTR

states that the PI is the ‘Contact for Scientific Queries’, unless the PI delegates this task to somebody else, the PR+ have not ~~adopted a uniformly~~ adopted this definition, and it is not always clear if the ‘Contact for Scientific Queries’ reflects ~~th~~ for the the PI.

Therefore, we have

separately looked into whether the PI name specifically, is compulsory.

**(iii) The audit trail of each record:**

We wished to know whether, where relevant, a given trial

(a) has an audit trail, and if so, (b) whether the changes are clearly highlighted; and (c) whether two versions of the record can be readily compared. In some cases where the sample trial, used for most analyses, did not have a history of changes, we used another sample trial, whose URL is provided in S5 Table.

**(iv) The flagging of retrospectively registered trials:**

We documented whether each PR+ specifically mentions the registration status of the trial (prospective vs retrospective), or flags retrospectively registered trials.

**(v) The reason for the termination of a trial, if applicable:**

In this case, we first determined whether the PR+ have a category of terminated trials. For those that do, we captured whether or not a reason for trial termination is provided.

### **III. Quality and Validity, Technical Capacity, and Data Interchange**

#### **Standards features**

234 **(i) Use of a controlled vocabulary for the health condition category:**

We evaluated whether (a) there is a drop down menu for choosing a term from a controlled  
237 vocabulary, (b) the registry recommends a widely used controlled vocabulary, or (c) the  
trialist has to use a free text box.

240 **(ii) The availability of documentation for the processes of the registry, or information on**  
**the site:**

We evaluated the presence of three types of documents, that is (a) a glossary or the definition  
243 of each field of the record, (b) a list of frequently asked questions (FAQs) and (c) one or  
more user guides.

246 **(iii) Security features of the registry website:**

The websites were checked for the presence of a basic security feature, an SSL certificate, as  
reflected in an ‘https’ in the website URL, instead of an ‘http’.

249 -----  
**Box 1. Terminology used in the study**

252 Here, we list a few terms that have been used throughout the study, along with a description  
of what these refer to:

- (a) the word ‘section’ only refers to one or more of the nine sections of the ISCTR;  
255 (b) the word ‘feature’ only refers to one or more of the 14 features of each registry that are  
the focus of this study; and  
(c) since the different registries may have different variants of each ‘feature’, we use the word  
258 ‘variation’ in this context.



261

264

267

270

### **The Registries' Comparative Scorecard ~~(the Scorecard)~~**

273

Overall, 14 features of the PR+ were assessed. Each registry has a particular variant of a given feature, which, ~~This variant~~, may be more useful or less so. A scoring rationale was devised for every feature analysed, based on which each registry received a score for its variation of a given feature. The rationale is described in detail in Table 1, and further details are provided in the Results and Discussion section.

276

The following general rules were applied for the scoring system. These are illustrated by particular features in Table 1.

279

(i) ~~If~~ the feature is absent, the registry gets a score of 0. This is illustrated ~~by~~ in features 1.2 and 1.5 ~~in~~.

282

(ii) ~~F~~or features with multiple ~~variant~~ variations, the score ranges from 1 to 5 based on pre-set criteria, as defined in Table 1. This is illustrated ~~by~~ in features 1.1 and 2.1 ~~in Table 1.~~

285

(iii) ~~F~~or certain features, which involve counts of fields present, the score increases by ~~one~~ 1 point per field. This is illustrated ~~by~~ in features 1.3 and 2.2 ~~in Table 1.~~

(iv) In case a registry has multiple possible scores for a particular feature, the highest one is awarded. This is illustrated by in features 1.5 in Table 1.

| <b>Table 1. Rationale for score given to each registry for features used to create the Scorecard.</b> |                                                                                                                                                                                                                                                                                                                         |                                    |
|-------------------------------------------------------------------------------------------------------|-------------------------------------------------------------------------------------------------------------------------------------------------------------------------------------------------------------------------------------------------------------------------------------------------------------------------|------------------------------------|
| The relevant Supplementary files with further details are also referenced.                            |                                                                                                                                                                                                                                                                                                                         |                                    |
| <b>Feature analyzed</b>                                                                               | <b>Rating scale and rationale</b>                                                                                                                                                                                                                                                                                       | <b>Relevant Supplementary file</b> |
| <b>1 Accessibility</b>                                                                                |                                                                                                                                                                                                                                                                                                                         |                                    |
| 1.1                                                                                                   | Total number of trials in the registry<br>Number displayed on home page: 5<br>Number available after a search: 3<br>Number needs to be calculated: 2<br>Discrepant information at different places on the site: 1                                                                                                       | S2 Table                           |
| 1.2                                                                                                   | Existence of Basic search function<br>Presence of a basic search function: 5<br>Absence of a basic search function: 0                                                                                                                                                                                                   | S2 Table                           |
| 1.3                                                                                                   | Advanced search function – TRDS fields<br>Each TRDS field: 1                                                                                                                                                                                                                                                            | S2 Table                           |
| 1.4                                                                                                   | Advanced search function – Extra fields<br>Each extra field: 1, but with a cap of 5 overall, because of the idiosyncratic nature of some of the search possibilities.                                                                                                                                                   | S2 Table                           |
| 1.5                                                                                                   | Data download options<br>Excel/csv/tsv: 5<br>HTML/XML: 2<br>Word/txt/pdf: 1<br>No download options: 0<br>Since all the registries except NTR permit HTML downloads (even if it is not explicitly stated), no registry gets a rating of '1'.                                                                             | S2 Table                           |
| <b>2 Content or TRDS sections</b>                                                                     |                                                                                                                                                                                                                                                                                                                         |                                    |
| 2.1                                                                                                   | Brief view: TRDS fields<br>10 or more fields, which are customizable, and wrapping of text: 5<br>10 or more fields, which are customizable, but without wrapping of text: 4<br>A fixed number of fields, that are more than 3: 3<br>Up to 3 fields: 1                                                                   | S3 Table                           |
| 2.2                                                                                                   | Brief view: Extra fields<br>Each field: 1 point                                                                                                                                                                                                                                                                         | S4 Table                           |
| 2.3                                                                                                   | Detailed view: TRDS fields<br>The number of fields over 20                                                                                                                                                                                                                                                              | S3 Table                           |
| 2.4                                                                                                   | Detailed view: Extra fields<br>Each field: 1 point<br>In this case, the maximum score is dictated by the registry with the maximum number of fields.                                                                                                                                                                    | S4 Table                           |
| 2.5                                                                                                   | Whether PI name is compulsory<br>PI name is compulsory: 5<br>It is not clear whether the scientific contact is the PI (regardless of whether or not this information is compulsory): 2<br>There is a field for the PI name, but it is not clear whether the information is compulsory: 2<br>The PI name is voluntary: 0 | S5 Table                           |
| 2.6                                                                                                   | Audit trail<br>Each of the following aspects receives 1 point: (i) the existence of an audit trail; (ii) the changes made are clearly highlighted; and (iii) it is possible to compare any two versions of the record.                                                                                                  | S5 Table                           |
| <b>3 Other Sections</b>                                                                               |                                                                                                                                                                                                                                                                                                                         |                                    |
| 3.1                                                                                                   | Health condition<br>A drop-down menu for choosing a term from a controlled vocabulary: 5<br>A widely used controlled vocabulary is recommended: 3<br>Free text field: 1                                                                                                                                                 | S5 Table                           |
| 3.2                                                                                                   | SSL certificate<br>Website secured with SSL: 3<br>Website not secured with SSL: 0                                                                                                                                                                                                                                       | S5 Table                           |
| 3.3                                                                                                   | Documentation<br>Provides (a) a glossary or the definition of each field of the record; (b) List of FAQs; (c) One or more user guides: 1 point each. No points are awarded for the quality of these documents.                                                                                                          | S5 Table                           |

## 291 **Results and Discussion**

294 We first documented basic information about each of the registries. The full name of each registry, its acronym, the country where it is based, and the year it was established are provided in Fig.1 and Table 2. Except CTG, the acronyms used for each registry ~~were~~ are the official acronyms. All but one of the PR+ were established between 2000 and 2010, inclusive. LBCTR was established in 2019. Eight registries (ANZCTR, ChiCTR, CTG, 297 DRKS, IRCT, ISRCTN, JPRN, and SLCTR) allow trial registrations from all countries, and the rest usually from the country where the registry is based, or from specific countries or regions. For example, PACTR caters to clinical trials conducted in Africa. -On 18 April 2020, 300 the registries cumulatively held 572,901 records, with CTG accounting for 336,444 (59-%) of them.

303 Trials may be registered either prospectively or retrospectively, that is before the enrolment of the first participant or after. Six of the PR+ (CTRI, IRCT, LBCTR, REPEC, SLCTR and TCTR) only allow prospective registration, whereas the remaining accept retrospective as 306 well. Five of the PR+ (EU-CTR, IRCT, PACTR, REPEC and SLCTR) accept only interventional clinical trials, while the remaining may accept others such as observational studies, post marketing surveys or expanded access programs. All the registries use English, 309 and 11 of them display some or all information in another language as well.

## 312 **Figure legend**

315 Fig. 1:

A. The timeline of establishment of the PR+. Key events related to trial registration are also noted.

B. Number of records per registry as on 18 April 2020. The pie chart shows the distribution of the number of records in each registry. The actual number, and as a percentage of the total, are also provided.

318

**Table 21. An overview of each registry, listing its acronym, full name, country where it is based, year established, number of trial records held, countries from where registration is accepted, type of registration allowed, type of study hosted, and language used.**

| Registry acronym   | Registry full name                                             | Country where registry is based | Countries from where registration is accepted                                                                                       | Type of registration allowed                                                                   | Type of study                                                                  | Additional language <sup>1,2</sup>                           |
|--------------------|----------------------------------------------------------------|---------------------------------|-------------------------------------------------------------------------------------------------------------------------------------|------------------------------------------------------------------------------------------------|--------------------------------------------------------------------------------|--------------------------------------------------------------|
| ANZCTR             | Australian New Zealand Clinical Trials Registry                | Australia                       | All countries. However, trials in Australia and New Zealand are prioritized                                                         | Prospective,<br>Retrospective <sup>2,3</sup>                                                   | Interventional,<br>Observational                                               | –                                                            |
| ChiCTR             | Chinese Clinical Trial Register                                | China                           | All countries                                                                                                                       | Prospective,<br>Retrospective                                                                  | Interventional,<br>Observational,<br>Others                                    | Chinese                                                      |
| CRIS               | Clinical Research Information Service                          | Republic of Korea               | Republic of Korea                                                                                                                   | Prospective,<br>Retrospective                                                                  | Interventional,<br>Observational                                               | Korean                                                       |
| CTG <sup>3,4</sup> | ClinicalTrials.gov                                             | USA                             | All countries                                                                                                                       | Prospective <sup>5</sup><br>Retrospective                                                      | Interventional,<br>Observational,<br>Expanded Access                           | –                                                            |
| CTRI               | Clinical Trials Registry - India                               | India                           | Other countries in the region which do not have a Primary Registry of their own <sup>4,6</sup>                                      | Prospective                                                                                    | Interventional,<br>Observational,<br>PMS <sup>5,7</sup> , BA/BE <sup>5,8</sup> | –                                                            |
| DRKS               | German Clinical Trials Register                                | Germany                         | All countries                                                                                                                       | Prospective,<br>Retrospective                                                                  | Interventional,<br>Observational,<br>Epidemiological,<br>Others                | German                                                       |
| EU-CTR             | EU Clinical Trials Register (EU-CTR)                           | The Netherlands                 | All interventional trials that have at least one centre in the EU and EEA. Certain trials conducted entirely outside these regions. | Prospective.<br>Retrospective if permitted by National Competent Authority of the Member State | Interventional                                                                 | Older trials may have content in the host country's language |
| IRCT               | Iranian Registry of Clinical Trials                            | Iran                            | All countries                                                                                                                       | Prospective                                                                                    | Interventional                                                                 | Persian                                                      |
| ISRCTN             | International Standard Registered Clinical/soCial sTudy Number | UK                              | All countries                                                                                                                       | Prospective,<br>Retrospective <sup>2,3</sup>                                                   | Interventional,<br>Observational                                               | –                                                            |
| JPRN               | Japan Primary Registries Network <sup>6,9</sup>                | Japan                           | All countries                                                                                                                       | Prospective,<br>Retrospective                                                                  | Interventional,<br>Observational                                               | Japanese                                                     |
| LBCTR              | Lebanon Clinical Trials Registry                               | Lebanon                         | Lebanon                                                                                                                             | Prospective                                                                                    | Interventional,<br>Observational                                               | Brief summary of the study is also available in Arabic       |

|       |                                          |                 |                                                                 |                              |                               |                                                                |
|-------|------------------------------------------|-----------------|-----------------------------------------------------------------|------------------------------|-------------------------------|----------------------------------------------------------------|
| NTR   | Netherlands Trial Register               | The Netherlands | Trials conducted in Netherlands or involving Dutch researchers. | Prospective, Ongoing studies | Interventional, Observational | Some information may be available in Dutch                     |
| PACTR | Pan African Clinical Trials Registry     | South Africa    | All countries in Africa                                         | Prospective, Retrospective   | Interventional                | –                                                              |
| ReBEC | Brazilian Registry of Clinical Trials    | Brazil          | Brazil <sup>4,6</sup>                                           | Prospective Retrospective    | Interventional, Observational | Portuguese and Spanish, for some records, and in a limited way |
| REPEC | Peruvian Clinical Trial Registry         | Peru            | Peru                                                            | Prospective                  | Interventional                | Spanish                                                        |
| RPCEC | Cuban Public Registry of Clinical Trials | Cuba            | Cuba <sup>7,8</sup>                                             | Prospective, Retrospective   | Interventional Observational  | Spanish                                                        |
| SLCTR | Sri Lanka Clinical Trials Registry       | Sri Lanka       | All countries                                                   | Prospective                  | Interventional                | –                                                              |
| TCTR  | Thai Clinical Trials Registry            | Thailand        | Thailand                                                        | Prospective                  | Interventional, Observational | –                                                              |

1. All registries are required to be in English. However, some provide content in additional language(s).  
2. Retrospective registration is allowed but prospective registration is preferred and encouraged.  
3. Except CTG, all the acronyms listed are the official acronyms.  
4. For two registries (CTRI, REBEC) the information on the ICTRP portal and on their own websites is discrepant. Upon inspection, the latter sources appear to be correct, and we have described the registries accordingly.  
5. PMS: post-marketing surveillance; BA/BE: Bioavailability/Bioequivalence.  
6. Common forum for trials from three Japanese registries, that is (UMIN Clinical Trials Registry (UMIN-CTR), Japan Pharmaceutical Information Center Clinical Trials Information (JAPIC-CTI), and Japan Medical Association - Center for Clinical Trials (JMACCT)).  
7. Trials are accepted from Cuban sponsors, conducting trials in Cuba or abroad, with Cuban or foreign products.  
Notably, some registries (ChiCTR, EU-CTR, ISRCTN, PACTR, REPEC) were built on earlier versions.

321 We then analysed 14 features of the PR+, which have been grouped according to the sections  
of ISCTR that they map to (S1 Table). In Table 3, we list the score obtained by each PR+ per  
feature, and overall. We also provide the maximum score possible per feature. Further details  
324 are provided below, or are available in relevant Supplementary files, which are referenced in  
Table 1. As mentioned, we analyzed 17 features of the PR+. However, as explained below,  
we evaluated only 14 of them to develop the Scorecard, details of which are provided in  
327 Table 2a. Here, we list the various features analyzed, and the maximum score possible for the  
feature. We also provide the score obtained by each PR+ per feature, and overall. To be  
noted, ISCTR recommends 24 Trial Registration Data Set (TRDS) fields. Any other field was  
330 referred to as an Extra field. In Table 2b, we describe the rationale for the scores, and the

weightage given to each variant of each feature. Further details are provided below, or are available in relevant Supplementary files, which are referenced in Table 2b. We have grouped the features according to the sections of ISCTR that they mapped to.

333

**Table 32a. The Scorecard.** ~~[We would like Table 2b to be part of 2a, on the right, but the uploading system didn't permit it.]~~

The list of features used to create the Scorecard; the maximum score per feature; the score obtained by each registry per feature, and overall per section; the total score per registry; and the rank of each registry.

|          | Max score                               | ANZCTR    | ChiCTR    | CRIS      | CTG       | CTRI      | DRKS      | EU-CTR    | IRCT      | ISRCTN    | JPRN      | LBCTR     | NTR       | PACTR     | ReBEC     | REPEC     | RPCEC     | SLCTR     | TCR       |           |
|----------|-----------------------------------------|-----------|-----------|-----------|-----------|-----------|-----------|-----------|-----------|-----------|-----------|-----------|-----------|-----------|-----------|-----------|-----------|-----------|-----------|-----------|
| <b>1</b> | <b>Accessibility section</b>            |           |           |           |           |           |           |           |           |           |           |           |           |           |           |           |           |           |           |           |
| 1.1      | Total number of trials in the registry  | 5         | 3         | 3         | 5         | 5         | 3         | 3         | 5         | 5         | 3         | 3         | 1         | 3         | 3         | 5         | 3         | 2         | 2         | 3         |
| 1.2      | Existence of Basic search function      | 5         | 5         | 0         | 5         | 5         | 5         | 5         | 5         | 5         | 5         | 0         | 5         | 5         | 5         | 5         | 5         | 0         | 5         |           |
| 1.3      | Advanced search function – TRDS fields  | 24        | 11        | 17        | 14        | 15        | 10        | 8         | 7         | 17        | 13        | 0         | 9         | 0         | 12        | 4         | 1         | 5         | 2         | 7         |
| 1.4      | Advanced search function – Extra fields | 5         | 1         | 5         | 5         | 5         | 4         | 5         | 3         | 5         | 5         | 0         | 0         | 0         | 2         | 1         | 2         | 0         | 0         | 0         |
| 1.5      | Data download options                   | 5         | 5         | 2         | 2         | 5         | 2         | 5         | 2         | 2         | 5         | 2         | 0         | 2         | 2         | 2         | 2         | 2         | 2         | 2         |
|          | <b>SUB-TOTAL</b>                        | <b>44</b> | <b>25</b> | <b>27</b> | <b>31</b> | <b>35</b> | <b>24</b> | <b>26</b> | <b>22</b> | <b>34</b> | <b>31</b> | <b>13</b> | <b>12</b> | <b>8</b>  | <b>24</b> | <b>17</b> | <b>13</b> | <b>14</b> | <b>6</b>  | <b>17</b> |
| <b>2</b> | <b>Content of TRDS sections</b>         |           |           |           |           |           |           |           |           |           |           |           |           |           |           |           |           |           |           |           |
| 2.1      | Brief view: TRDS fields                 | 5         | 3         | 3         | 4         | 5         | 3         | 3         | 3         | 3         | 1         | 3         | 3         | 1         | 3         | 3         | 3         | 1         | 1         | 5         |
| 2.2      | Brief view: Extra fields                | 5         | 3         | 1         | 2         | 2         | 0         | 3         | 1         | 3         | 1         | 1         | 1         | 0         | 3         | 0         | 0         | 1         | 5         | 1         |
| 2.3      | Detailed view: TRDS fields              | 4         | 4         | 4         | 3         | 4         | 3         | 2         | 2         | 2         | 4         | 4         | 4         | 3         | 4         | 0         | 3         | 1         | 4         | 3         |
| 2.4      | Detailed view: Extra fields             | 15        | 10        | 5         | 10        | 15        | 8         | 6         | 9         | 7         | 10        | 0         | 9         | 5         | 5         | 4         | 10        | 6         | 5         | 9         |
| 2.5      | Whether PI name is compulsory           | 5         | 5         | 5         | 5         | 0         | 0         | 5         | 5         | 2         | 2         | 2         | 2         | 5         | 0         | 2         | 5         | 2         | 2         |           |
| 2.6      | Audit trail                             | 3         | 1         | 1         | 3         | 3         | 1         | 3         | 0         | 3         | 2         | 0         | 1         | 0         | 3         | 0         | 0         | 3         | 2         | 0         |
|          | <b>SUB-TOTAL</b>                        | <b>37</b> | <b>26</b> | <b>19</b> | <b>27</b> | <b>29</b> | <b>15</b> | <b>22</b> | <b>20</b> | <b>20</b> | <b>10</b> | <b>20</b> | <b>11</b> | <b>23</b> | <b>7</b>  | <b>18</b> | <b>17</b> | <b>19</b> | <b>20</b> |           |
| <b>3</b> | <b>Other sections</b>                   |           |           |           |           |           |           |           |           |           |           |           |           |           |           |           |           |           |           |           |
| 3.1      | Health condition                        | 5         | 5         | 3         | 5         | 3         | 5         | 5         | 5         | 3         | 1         | 5         | 5         | 1         | 5         | 5         | 3         | 1         | 1         | 3         |
| 3.2      | SSL certificate                         | 5         | 5         | 0         | 5         | 5         | 0         | 5         | 5         | 5         | 0         | 5         | 0         | 5         | 5         | 0         | 5         | 0         | 5         | 5         |

|     |                              |           |           |           |           |           |           |           |           |           |           |           |           |           |           |           |           |           |           |           |
|-----|------------------------------|-----------|-----------|-----------|-----------|-----------|-----------|-----------|-----------|-----------|-----------|-----------|-----------|-----------|-----------|-----------|-----------|-----------|-----------|-----------|
| 3.3 | Documentation                | 3         | 3         | 2         | 2         | 3         | 3         | 3         | 3         | 1         | 3         | 0         | 3         | 0         | 2         | 3         | 2         | 2         | 2         | 3         |
|     | <b>SUB-TOTAL</b>             | <b>13</b> | <b>13</b> | <b>5</b>  | <b>12</b> | <b>11</b> | <b>8</b>  | <b>13</b> | <b>13</b> | <b>9</b>  | <b>4</b>  | <b>10</b> | <b>8</b>  | <b>6</b>  | <b>12</b> | <b>8</b>  | <b>10</b> | <b>3</b>  | <b>8</b>  | <b>11</b> |
|     | <b>TOTAL</b>                 | <b>94</b> | <b>64</b> | <b>51</b> | <b>70</b> | <b>75</b> | <b>47</b> | <b>61</b> | <b>55</b> | <b>63</b> | <b>55</b> | <b>33</b> | <b>40</b> | <b>25</b> | <b>59</b> | <b>32</b> | <b>41</b> | <b>34</b> | <b>33</b> | <b>48</b> |
|     | <b>% of TOTAL</b>            |           | <b>68</b> | <b>54</b> | <b>74</b> | <b>80</b> | <b>50</b> | <b>65</b> | <b>59</b> | <b>67</b> | <b>59</b> | <b>35</b> | <b>43</b> | <b>27</b> | <b>63</b> | <b>34</b> | <b>44</b> | <b>36</b> | <b>35</b> | <b>51</b> |
|     | <b>Rank of each registry</b> |           | <b>3</b>  | <b>9</b>  | <b>2</b>  | <b>1</b>  | <b>11</b> | <b>5</b>  | <b>7</b>  | <b>4</b>  | <b>7</b>  | <b>15</b> | <b>13</b> | <b>18</b> | <b>6</b>  | <b>17</b> | <b>12</b> | <b>14</b> | <b>15</b> | <b>10</b> |

**Table 2b. Rationale for weightage given to each registry for features used to create the Scorecard.**

The relevant Supplementary files with further details are also referenced.

| Feature analyzed                            | Rating scale and rationale                                                                                                                                                                                                                                                             | Relevant Supplementary file |
|---------------------------------------------|----------------------------------------------------------------------------------------------------------------------------------------------------------------------------------------------------------------------------------------------------------------------------------------|-----------------------------|
| <b>1 Accessibility</b>                      |                                                                                                                                                                                                                                                                                        |                             |
| 1.1 Total number of trials in the registry  | Number displayed on home page: 5<br>Number available after a search: 3<br>Number needs to be calculated: 2<br>Discrepant information at different places on the site: 1                                                                                                                | S2-Table                    |
| 1.2 Existence of Basic search function      | Presence of a basic search function: 5<br>Absence of a basic search function: 0                                                                                                                                                                                                        | S2-Table                    |
| 1.3 Advanced search function – TRDS fields  | Each TRDS field: 1                                                                                                                                                                                                                                                                     | S2-Table                    |
| 1.4 Advanced search function – Extra fields | Each extra field: 1, but with a cap of 5 overall, because of the idiosyncratic nature of some of the search possibilities.                                                                                                                                                             | S2-Table                    |
| 1.5 Data download options                   | Excel/csv/tsv: 5<br>HTML/XML: 2<br>Word/text/pdf: 1<br>No download options: 0<br>Since all the registries except NTR permit HTML downloads (even if it is not explicitly stated), no registry gets a rating of '1'.                                                                    | S2-Table                    |
| <b>2 Content or TRDS sections</b>           |                                                                                                                                                                                                                                                                                        |                             |
| 2.1 Brief view: TRDS fields                 | 10 or more fields, which are customizable, and wrapping of text: 5<br>10 or more fields, which are customizable, but without wrapping of text: 4<br>A fixed number of fields, that are more than 3: 3<br>Upto 3 fields: 1                                                              | S3-Table                    |
| 2.2 Brief view: Extra fields                | Each field: 1 point                                                                                                                                                                                                                                                                    | S4-Table                    |
| 2.3 Detailed view: TRDS fields              | The number of fields over 20                                                                                                                                                                                                                                                           | S3-Table                    |
| 2.4 Detailed view: Extra fields             | Each field: 1 point<br>In this case, the maximum score is dictated by the registry with the maximum number of fields.                                                                                                                                                                  | S4-Table                    |
| 2.5 Whether PI name is compulsory           | PI name is compulsory: 5<br>It is not clear whether the scientific contact is the PI (regardless of whether or not this information is compulsory): 2<br>There is a field for the PI name, but it is not clear whether the information is compulsory: 2<br>The PI name is voluntary: 0 | S5-Table                    |
| 2.6 Audit trail                             | Each of the following aspects receives 1 point: (i) the existence of an audit trail; (ii) the changes made are clearly highlighted; and (iii) it is possible to compare any two versions of the record.                                                                                | S5-Table                    |
| <b>3 Other Sections</b>                     |                                                                                                                                                                                                                                                                                        |                             |
| 3.1 Health condition                        | A drop-down menu for choosing a term from a controlled vocabulary: 5<br>A widely used controlled vocabulary is recommended: 3<br>Free text field: 1                                                                                                                                    | S5-Table                    |
| 3.2 SSL certificate                         | Website secured with SSL: 3<br>Website not secured with SSL: 0                                                                                                                                                                                                                         | S5-Table                    |
| 3.3 Documentation                           | Provides (a) a glossary or the definition of each field of the record; (b) List of FAQs; (c) One or more user guides: 1 point each. No points are awarded for the quality of these documents.                                                                                          | S5-Table                    |



1. Accessibility:

339 One of the principal reasons for the existence of clinical trial registries is to provide the  
public with information, and to thereby increase trust in the trial enterprise [28]. Therefore,  
we first examined the accessibility of information in the PR+. For this, we assessed several  
342 features, as described below:

**(i) Ease of obtaining the total number of trials**

345 As a first step, it is important to know how many records the database holds. This number  
should be readily available, and we have therefore analysed the ease of accessing it. The five  
registries (CRIS, CTG, EU-CTR, IRCT and ReBEC) that list it on the homepage were given  
348 the highest score of 5. Ten registries display this number after a search for all trials, and  
received a score of 3. Two registries (RPCEC, SLCTR), for which the number of records is  
351 available only by a manual calculation, received 2. LBCTR provides discrepant information  
at different places on the site, and thus received the lowest score of 1. The median score  
obtained was 3. It is a trivial task to put the figure for the total number of trials on the home  
page, and we encourage all registries to do so

354 ~~Coming to the search functions, for nearly all~~ For a significant fraction of users, the search  
functions are crucially important to access the information in a registry. ISCTR  
357 recommends that at the minimum, there must be a basic text search, as well as and it must be  
possible to search within the interventions and conditions fields. Several PR+ go much  
further than this, and therefore we have conducted a detailed assessment of their search  
360 capabilities.

**(ii) Basic Search function**

363 We determined the presence of a basic search function and have awarded a score of 5 to the  
15 registries that provide it. Only three (ChiCTR, LBCTR and SLCTR) do not have this  
feature, and received 0. The median score was 5.

366 Most PR+ have a basic search function that enables search by keywords. This is a crucial  
aspect of the functionality of the trial registry website, and significantly increases the ease of  
searching for information and improves user experience.

**(iii) Advanced search function - TRDS fields**

372 We then examined how many of the 24 TRDS fields could be used in the Advanced search  
function. Out of a possible score of 24, where the registries received 1 point per field, the  
maximum score of 17 was attained by ChiCTR and IRCT. JPRN and NTR do not allow a  
375 search by any TRDS field and received 0. The remaining registries received scores between 1  
and 15. The median score was 8.5.

**(iv) Advanced search function - Extra fields**

378 A few registries list fields other than the TRDS fields as part of the search function. Six PR+  
(ChiCTR, CRIS, CTG, DRKS, IRCT and ISRCTN) have five or more Extra fields, and  
381 therefore received a score of 5. Six registries (ANZCTR, CTRI, EU-CTR, PACTR, ReBEC  
and REPEC) received scores ranging from 1–4. Six registries do not allow a search using any  
Extra fields, and received 0. The median score was 2.

384  
387 Overall, the PR+ provided more fields in the Advanced search function than the minimum  
recommended by the ISCTR. This becomes especially relevant for researchers conducting

systematic reviews, work which requires extensive searches to gather information on clinical trials in specific areas.

390

#### **(v) Data download options**

Having conducted a search, users may wish to download many fields of data, for many records. We therefore gave the highest score of 5 to the five registries (ANZCTR, CTG, DRKS, ISRCTN and JPRN) that allow data downloads in a csv, excel or tsv format. 12 registries provide HTML and XML options, and received a score of 2. Only NTR lacks any options for data download, and received 0. The median score was 2.

393

396

All the available data download options are adequate for the inspection of a few records, but it is essential that the PR+ provide bulk data download options such as csv, especially as an increasing number of users are shifting towards automated systems of analysis.

399

## **2. Content and TRDS sections**

Next, we examined multiple features that map to the Content or TRDS sections, which overlap since the TRDS fields are a form of content. Below, we describe our scoring of the Brief and Detailed views of the PR+.

402

405

#### **(i) Brief View: TRDS fields**

Since the Brief view is primarily designed to provide an overview of the trial, it can be very helpful for a user if the number of fields in the Brief view can be customized. Therefore, we have given higher scores to registries that provide this option. Two registries (CTG and TCTR), display more than 10 TRDS fields, and allow customization and text wrapping. They received the maximum score of 5. CRIS displays more than 10 TRDS fields, that are customizable but without text wrap, and received 4. Eleven registries display more than three

408

411

414 fields, which are fixed, and got a score of 3. The four registries (ISRCTN, NTR, RPCEC and  
415 SLCTR) that display three fields or less received 1. The median score was 3.

416 A customizable brief view of search results is extremely useful in a trial registry, where  
417 different types of users such as patients, healthcare professionals or sponsors, may be  
418 interested in different fields.

#### 420 **(ii) Detailed View: TRDS fields**

The Detailed view tends to have all 24 TRDS fields. However, we found that all the PR+ do  
not yet list the four fields that have been included in the latest version of TRDS [29]. Eight  
423 registries (ANZCTR, ChiCTR, CTG, ISRCTN, JPRN, LBCTR, PACTR and SLCTR) do so,  
424 and received the highest score of 4. Most of the remaining PR+ display between one and  
425 three of the new fields and were scored accordingly. Only one registry, ReBEC, has not been  
426 updated to display any of the new fields, and received a score of 0. The median score was 3.  
427 We hope that over time more registries will be in full compliance with the ISCTR-mandated  
428 fields.

#### 429 **(iii) Extra fields**

Registries list Extra fields in both the Brief and Detailed views. In the Brief View, only  
432 SLCTR received the maximum score of 5. Four registries (CTRI, NTR, ReBEC and REPEC)  
433 have no Extra fields and received a score of 0. The remaining have between one and three of  
434 such fields and were scored accordingly. The median score was 1.

435 In the Detailed View, most registries have between five and 10 Extra fields. However CTG  
436 has 15, and JPRN has none. The median score was 7.5.

438 Some of the Extra fields, such as the date of last update, and whether registration was  
prospective or retrospective, are recommended by ISCTR. Interestingly, one-third or more of

441 the registries list several fields that the ISCTR does not specifically recommend. This seems  
to reflect a certain level of agreement among the managers of registries that particular fields  
are important. There may be a range of reasons for including these ~~Extra~~ fields. For instance,  
444 India had been criticized for the lack of appropriate oversight to ensure the ethical conduct of  
trials, and therefore CTRI asked trialists for details of the ethics committee even before  
ISCTR ~~required this information~~ [38,39]. Also, there have been demands from the  
447 Cochrane collaboration, and many other individuals and groups, to include several additional  
items in the ISCTR list, which WHO has not agreed to. It is alleged that the recommended  
list is closer to what industry demanded [40]. As such, although ISCTR may not list every  
450 field that many people believed to be essential, managers of particular registries may have  
chosen to list some of them.

453 We explored some of these Extra fields in greater detail below.

**(iv) Whether PI name is compulsory**

456 For the sake of accountability it is important that the field 'PI name' is compulsory [25,41].  
Although we have assessed Contact for Scientific Queries as a TRDS field, we have not  
assumed that this person is the PI, and therefore have separately looked into whether the PI  
459 name is compulsory. In sSeven registries (ANZCTR, ChiCTR, CRIS, DRKS, EU-CTR,  
PACTR and RPCEC) it is so, and they received the highest score of 5. Several have either not  
made it clear whether the scientific contact is the PI, or have a separate field for the PI name  
462 but have not stated whether it is compulsory. They each received a score of 2. Three registries  
(CTG, CTRI and ReBEC) have marked this field as voluntary, and received 0. The median  
score was 2.

465 WHO documents [25,41] have contradictory information on the issue of PI name and Contact  
for Scientific Queries. They require that the PI's name, title and email ID be provided, but

468 state that this should be a functional name, not a personal one. ISCTR states that the PI is the  
471 Contact for Scientific Queries, unless the PI delegates this task to somebody else. If the PI  
name is compulsory – and preferably recorded in a fixed format [42] – then this information  
will enable researchers to quantify the number of unique PIs in a country, ask whether a PI  
has been taking on too many trials, and perform other analyses. Therefore we commend the  
474 registries that have made this field compulsory.

**(v) Audit trail**

477 ISCTR requires that the audit trail of each record should be publicly available and so we have  
examined the presence and usefulness of this feature. Six registries (CRIS, CTG, DRKS,  
IRCT, PACTR and RPCEC) have the option of comparing two versions of the trial record  
and received the maximum score of 3; two (ISRCTN and SLCTR) have highlighted the  
480 changes made to a trial record, and got 2; four (ANZCTR, ChiCTR, CTRI and LBCTR) have  
a basic form of an audit trail and got 1; and six of the PR+ do not provide any audit trail and  
got 0. The median score was 1. It is clear that most registries do not have an ideal audit trail.

483 The information pertaining to the following two features is present in the Extra fields, either  
as a separate field in the Detailed view, or marked with a flag in the Brief View. Hence we  
486 have not scored these features separately.

**(vi) Flagging retrospective or prospective registration status of a trial**

489 Prospective registration is crucial to prevent unrecorded ‘outcome switching’, which creates a  
bias in the medical evidence base [28]. Nevertheless, it has been argued that (i) it is a duty to  
492 trial participants to register each trial, and subsequently publish the results, and (ii) not  
registering a trial could lead to its loss from the documented universe of trials- [43].

495 As such, retrospective registration is better than non-registration, and therefore many PR+ permit it. We have documented this in Table 1.

498 Users may have more confidence in the results of a prospectively than a retrospectively registered trial. Further, flagging retrospectively registered ones may shame the registrants into registering prospectively in future [14]. Accordingly, we have analysed whether PR+ highlight the registration status of trials and flag retrospectively registered ones.  
501 Over half of the PR+ do so.

504 **(viig) The reason for the termination of a trial, if applicable**

504 It is important to know why a study was terminated as it provides economic, ethical and scientific insights that can help improve ongoing or upcoming clinical trials [44]. Our analysis showed that only eight registries provide this information at all, and only three provide drop-down menus of reasons for termination (Table S5). Researchers who have studied the leading causes of trial termination have suggested that the cause should be selected from a fixed set of options [45].  
510

**3. Other sections:**

513 Finally, we examined three features that map to other sections of the ISCTR, as follows: (a) Health condition, (b) the presence of a Secure Sockets Layer (SSL) certificate and (c) Documentation.

516 **(i) Health condition**

First, the issue of classifying health conditions, which maps to Data Interchange Standards. We find that only half the PR+ provide drop-down menus for this field, and they received the highest score of 5. Five registries (ChiCTR, CTG, IRCT, REPEC and TCTR) recommend the use of standardized vocabulary, and received 3. Four registries (ISRCTN, NTR, RPCEC and  
519

522 SLCTR) that do not provide such options, and have a free text field for health condition,  
received 1. The median score was 4.

525 Comparisons across registries are easier if each one uses a controlled vocabulary, and in  
particular one that maps to a widely-used metathesaurus [46] as recommended in ISCTR  
[25]. It is therefore preferable that the health condition be selected from a fixed set of options.

528 **(ii) The presence of an ~~Secure Sockets Layer~~ (SSL) certificate**

Second, the security of the website. In the Technical Capacity section, ISCTR requires that  
each registry have adequate protection against the corruption or loss of data. We have  
531 assessed something basic, that is whether the website is secured with an SSL certificate, as is  
evident when a website URL contains 'https'. We find that only 12 of the PR+ websites have  
this certification, and ~~have been given~~each received a score of 5. The remaining six registries  
534 (ChiCTR, CTRI, ISRCTN, LBCTR, ReBEC and RPCEC) have URLs with an 'http', and  
received 0. The median score was 5.

537 The SSL certificate is an important tool to safeguard data of the registry and that of its users,  
and Google currently marks all sites without it as insecure [47]. As such, it is also a sign of  
credibility for a user who may hesitate to access a site ~~without~~that lacks a security certificate.

540 **(iii) Documentation**

Third, the issue of documentation. Various documents help users to understand the processes  
543 of a registry, or the data it hosts. Only half the PR+ ~~(9 registries)~~ provide all the three types of  
documentation we have assessed, and received a score of 3. Six registries (ChiCTR, CRIS,  
PACTR, REPEC, RPCEC and SLCTR) have only two types of documents and received 2,  
546 and one registry (IRCT) displays only a user guide and received a score of 1. Two registries



(JPRN and NTR) do not provide any documentation, and have received 0. The median score obtained was 2.5.

Although the three documents that we have scored are not explicit requirements of the ISCTR, they assist users in registering their trial correctly. As such, this feature maps to the Quality and Validity section.

In general, w~~We~~ have barely touched upon Quality and Validity, since investigating the completeness or quality of the records in the PR+ would be a large exercise in itself. The sponsor needs to ensure a high quality trial record, but this may not happen, and -vVarious studies have highlighted ~~such~~ deficiencies in the records of different registries [10–13,48] ~~[eg. Mounika, Viergever papers, Ogino, Sangeeta paper, Yadav – Clinical trials registered in clinical trial registry of India: A survey].~~ It is also the duty of the managers of the registry to facilitate better quality trial registration, as has been recommended by ISCTR. Additionally, for several of the minimum standards recommended by ISCTR, either it is not possible for us to assess compliance, or the requirements do not immediately impact use of the registry data. Therefore we have also barely touched upon Unambiguous Identification (although Secondary identifying numbers, a field in TRDS, also maps to this section), Technical Capacity, and Data Interchange Standards. Further, we have not touched upon the sections (i) Administration and Governance, and (ii) Partner Registries.

Overall, as derived from an assessment of 145 features described above, the maximum score that any registry obtained was 94 points (Table 32). The PR+ received scores ranging from 27% (NTR) to 80% (CTG) of the maximum, with an average of 52%. Despite the limited nature of our audit, the lowest- and highest-scoring registries received scores that differ by over 50%. To the best of our knowledge, this widely divergent quality of the PR+ has not

576 been documented before. ~~The maximum score that any registry could obtain is 94 points (Table 2). The PR+ received scores ranging from 27% (NTR) to 80% (CTG) of the maximum, with an average of 52%.~~

## 579 **Discussion**

582 As mentioned, the PR+ received scores ranging from 27% to 80% of the maximum score. This derives from an assessment of 14 features, many of which we discuss in Box 1, that largely map to (i) Accessibility, or (ii) Content or TRDS. We have barely touched upon Quality and Validity, since investigating the completeness or quality of the records in the PR+ would be a large exercise in itself. For several of the minimum standards recommended by ISCTR, either it is not possible for us to assess compliance, or the requirements do not immediately impact use of the registry data. Therefore we have also barely touched upon Unambiguous Identification (which Secondary identifying numbers, a field in TRDS, also maps to), Technical Capacity, and Data Interchange Standards. Further, we have not touched upon the sections (i) Administration and Governance, and (ii) Partner Registries. Despite the limited nature of our audit, the lowest and highest scoring registries receive scores that differ by over 50%. To the best of our knowledge, this widely divergent quality of the PR+ has not  
591 been documented before.

## An ideal registry

We found that the registries show a high degree of variability for a given feature, ranging from a sophisticated ~~version~~ to a routine variant-variation, or its complete absence. We have used the best ~~version variants~~ of the features analyzed to define an interim ideal registry. In ~~this~~ such a registry,

- (i) the total number of trials is displayed on the home page;
- (ii) a search is possible through (a) a basic search function, (b) each of the TRDS fields, and (c) a few extra fields;
- (iii) the data download options include a csv, excel, or tsv format, and support automated bulk downloads;
- (iv) the Brief view is customizable, with 10 or more fields, ~~which can be~~ with text wrapping;
- (v) the Detailed view includes all the TRDS fields;
- (vi) there is clarity on whether or not the scientific contact is the PI;
- (vii) the PI name is compulsory;
- (viii) the reason for the termination of a trial ~~is is provided, after being~~ selected from a drop-down menu of possible reasons;
- (ix) each trial has an audit trail that enables a comparison of any two versions;
- (x) at the very least, the following documents are provided, in English: (a) a definition of each field of the record, (b) a list of FAQs, and (c) one or more user guides;
- (xi) the website is secured with an SSL certificate; and
- (xii) the health condition category ~~has is chosen from~~ a drop-down menu with to enable ~~trialists to choose a term from~~ a controlled vocabulary, preferably a widely used one.

Formatted: Heading 2

618 ~~Although~~The ISCTR recommends several other standard including higher data quality, more  
621 complete records and the reporting of results, ~~and~~~~Although~~ it is hoped that all registries  
will implement all of ~~them~~these standards in due course, in the interim, ~~all the~~registries may  
wish to implement the list above if they have not already done so.

624 Registries have many users. The scorecard above analyses features that are of interest to the  
authors and, by extension, possibly to other researchers concerned with the health of the trial  
ecosystem overall. Other categories of users, such as medical professionals, patients, trial  
627 sponsors, policy makers, data scientists and so on, may wish to alter the assessed features, or  
the scoring, in order to rank the registries according to their priorities. For instance, a data  
scientist would be very appreciative of ANZCTR, which~~—~~specifically enables web crawling  
of its records [49]. Furthermore, the managers of other registries, either public or private, and  
630 either based on the data in the PR+ or not, may be interested in the results of this study.

633 The ongoing Covid-19 pandemic has forcefully brought home the need for high quality trial  
registries with information that is consistent, comprehensive and available in a user-friendly  
fashion. Billions of people need to be immediately protected from the virus, and large  
636 numbers of drugs and vaccines are in trials. There is world-wide interest in these trials, and  
information that is being tracked includes what is being trialled; where these trials are taking  
place; and the results of these trials. Each country needs to take public health decisions,  
639 which will evolve as the evidence from trials running in different parts of the world yield  
results. Public trial registries are one of the fastest ways of communicating these results.

642 Further, the publicly available, freely accessible information in such registries helps to build  
trust with the public [45,46,26,44]. Covid-19 trials have been among the fastest recruiting  
ones in history [45] ~~[NV: These two links don't work for me one shows error, the other~~  
~~requires subscription~~[50,51]], and it is possible that the publicly available information in trial

645 registries has helped many of the potential trial participants decide to enrol.

648 It is not just that everyone is interested in the positive outcomes of trials. For example, an  
inspection of the CTRI records of hundreds of eCovid-19 trials being run in India has thrown  
up quality issues in almost all of them. Based on negative publicity, the government has taken  
action in some cases [52].

651 There is a long history of various stakeholders arguing for the need to improve registries and  
the quality of trial registration. Examples include academics and health activists [53–55],  
654 journals (ICMJE) [56], WHO [41], registry managers [57], funders [58,59] and  
governments [60]. Each of these efforts has led to some improvements in the number and  
quality of trial records hosted by registries. However none of them has led to a perfect set of  
657 records. It is likely that the only way this will be achieved is if all stakeholders continue to  
apply pressure on the registries. Studies such as this one help to highlight deficiencies, which  
adds to the other efforts aimed at improving registries. The authors would welcome other  
660 researchers' efforts to create and update a website that lists the scorecard, with periodic  
updates. Should such a website not be created by any other group, the authors intend to re-  
evaluate the registries' performance on the scorecard every few years.

663  
In summary, to the best of our knowledge, this is the first study undertaking a comparative  
analysis of WHO-recognized registries to assess compliance to ISCTR. Our use of a  
666 scorecard, based on preset criteria, ensured an impartial quantification of the quality of the  
features analyzed across the PR+. As such, even though our study analyzed a limited set of  
features, it clearly shows the substantial variation in compliance with the recommended  
669 minimal standards. Our study would be helpful to researchers who may wish to extend this  
audit and evaluate the completeness of the records or the quality of their data, two other  
major issues, in all 18 registries.

672 ~~Registries have many users, such as patients and their families, clinicians, researchers, trial~~  
~~sponsors, policy makers and so on. It is the perspective of researchers such as the authors,~~  
~~concerned with the health of the trial ecosystem overall, that has guided the current analysis.~~  
675 ~~Other users may have a different focus, and may wish to alter the assessed fields or the~~  
~~scores. Further, there are other registries, either public or private, and either based on the data~~  
~~in the PR+ or not, which may be interested in the results of this analysis.~~

678  
This study has a few limitations, as follows: (i) It assesses only some of the many features in  
each registry. In particular, it does not evaluate any aspect of trial methodology or results,  
681 which are crucial ~~sections~~ portions of such registries. As such, otherwise outstanding  
registries may have fared less well than expected. (ii) We have not evaluated the  
completeness of any records or the quality of their data. (iii) Each registry has been evaluated  
684 with respect to the list of fields in a recently registered trial. Earlier records in the same  
registry may have different content if the required details have changed over time. (iv) We  
have primarily focused on information that is available in English and may have missed  
687 important content in other languages. (v) Although applied systematically, the absolute  
values of the scores are arbitrary.

## 690 **Conclusions**

Over the years, CTG has received most of the attention of those interested in the accessibility  
693 and integrity of the data in public trial registries. As noted above, 41% of the records are held  
in the other PR+, and ~~a searchlight needs to be turned on them~~ need to be examined as well.  
We have identified the best version variation of several features that have already been  
696 implemented by one or more of these registries, and which serve as pointers on how the  
others may improve. Running a registry is not merely a bureaucratic task, but is part of a

mission to safeguard patients' lives, and the ethics and science of medicine. We hope that our analysis is of some assistance in this. ~~We also believe that our study would be helpful to researchers who may wish to extend this audit and evaluate the completeness of the records or the quality of their data, two other major issues, in all 18 registries.~~

## References

1. Dickersin K, Rennie D. Registering clinical trials. JAMA. 2003 Jul 23;290(4):516-23. doi: 10.1001/jama.290.4.516. PMID: 12876095.
2. Krleza-Jerić K. Clinical trial registration: the differing views of industry, the WHO, and the Ottawa Group. PLoS Med. 2005 Nov;2(11):e378. doi: 10.1371/journal.pmed.0020378. Epub 2005 Oct 18. PMID: 16221000; PMCID: PMC1255765.
3. Lundh A, Krogsbøll LT, Gøtzsche PC. Access to data in industry-sponsored trials. Lancet. 2011 Dec 10;378(9808):1995-1996. doi: 10.1016/S0140-6736(11)61871-0. PMID: 22153200.
4. Lemmens T and Bouchard R, Mandatory Clinical Trial Registration: Rebuilding Public Trust in Medical Research (2007). GLOBAL FORUM UPDATE ON RESEARCH FOR HEALTH, Vol. 4: Equitable Access: Research Challenges for Health in Developing Countries, pp. 40-46, London: Pro-Book Publishing, 2007. Available at SSRN: <https://ssrn.com/abstract=1083565>.
5. Miller JE, Ross JS, Moch KI, Caplan AL. Characterizing expanded access and compassionate use programs for experimental drugs. BMC Res Notes. 2017 Jul 28;10(1):350. doi: 10.1186/s13104-017-2687-5. PMID: 28754150; PMCID: PMC5534121.
6. Askie LM, Hunter KE, Berber S, Langford A, Tan-Koay AG, Vu T et al. The clinical trials landscape in Australia 2006–2015. Sydney: Australian New Zealand Clinical Trials Registry 2017.
7. Li MD, Atkins H, Bubela T. The global landscape of stem cell clinical trials. Regen Med. 2014 Jan;9(1):27-39. doi: 10.2217/rme.13.80. Epub 2013 Nov 18. PMID: 24236476.
8. Tharyan P, George AT, Kirubakaran R, Barnabas JP. Reporting of methods was better in the Clinical Trials Registry-India than in Indian journal publications. J Clin Epidemiol. 2013 Jan;66(1):10-22. doi: 10.1016/j.jclinepi.2011.11.011. Epub 2012 Mar 27. PMID: 22459428.
9. Yasmeen A. Infant milk: Nestle's clinical trial under scanner. The Hindu. 3 Aug 2019. Available: <https://www.thehindu.com/news/national/infant-milk-nestles-clinical-trial-under-scanner/article28809296.ece>. Accessed 25 Sep 2020.

- 747 10. Viergever RF, Ghersi D. The quality of registration of clinical trials. *PLoS One*. 2011 Feb 24;6(2):e14701. doi: 10.1371/journal.pone.0014701. PMID: 21383991; PMCID: PMC3044717.
- 750 11. Viergever RF, Karam G, Reis A, Ghersi D. The quality of registration of clinical trials: still a problem. *PLoS One*. 2014 Jan 10;9(1):e84727. doi: 10.1371/journal.pone.0084727. PMID: 24427293; PMCID: PMC3888400.
- 753 12. Chaturvedi N, Mehrotra B, Kumari S, Gupta S, Subramanya HS, Saberwal G. Some data quality issues at *ClinicalTrials.gov*. *Trials*. 2019 Jun 24;20(1):378. doi: 10.1186/s13063-019-3408-2. PMID: 31234923; PMCID: PMC6591874.
- 756 13. Pillamarapu M, Mohan A, Saberwal G. An analysis of deficiencies in the data of interventional drug trials registered with Clinical Trials Registry - India. *Trials*. 2019 Aug 28;20(1):535. doi: 10.1186/s13063-019-3592-0. PMID: 31455366; PMCID: PMC6712861.
- 759 14. Fleming J, Goldacre B. Prevalence of clinical trial status discrepancies: A cross-sectional study of 10,492 trials registered on both *ClinicalTrials.gov* and the European Union Clinical Trials Register. *PLoS One*. 2018 Mar 7;13(3):e0193088. doi: 10.1371/journal.pone.0193088. PMID: 29513684; PMCID: PMC5841737.
- 762 15. Zarin DA, Tse T, Williams RJ, Carr S. Trial Reporting in *ClinicalTrials.gov* - The Final Rule. *N Engl J Med*. 2016 Nov 17;375(20):1998-2004. doi: 10.1056/NEJMs1611785. Epub 2016 Sep 16. PMID: 27635471; PMCID: PMC5225905.
- 765 16. Kumari S, Mohan A, Saberwal G. Hidden duplicates: 10s or 100s of Indian trials, registered with *ClinicalTrials.gov*, have not been registered in India, as required by law. *PLoS One*. 2020 Jun 19;15(6):e0234925. doi: 10.1371/journal.pone.0234925. PMID: 32559240; PMCID: PMC7304601.
- 768 17. Alarcon-Ruiz CA, Roque-Roque JS, Heredia P, Gómez-Briceño AR, Quispe AM. Twenty-two years' experience registering trials in a low-middle income country: The Peruvian Clinical Trial Registry. *J Evid Based Med*. 2019 Aug;12(3):187-193. doi: 10.1111/jebm.12354. Epub 2019 Jun 18. PMID: 31215157.
- 771 18. Ranawaka UK, de Abrew A, Wimalachandra M, Samaranayake N, Goonaratna C. Ten years of clinical trial registration in a resource-limited setting: Experience of the Sri Lanka clinical trials registry. *J Evid Based Med*. 2018 Feb;11(1):46-50. doi: 10.1111/jebm.12284. Epub 2018 Jan 11. PMID: 29322622.
- 774 19. Krumholz HM, Ross JS, Presler AH, Egilman DS. What have we learnt from Vioxx? *BMJ*. 2007 Jan 20;334(7585):120-3. doi: 10.1136/bmj.39024.487720.68. PMID: 17235089; PMCID: PMC1779871.
- 777 20. Jureidini JN, McHenry LB, Mansfield PR. Clinical trials and drug promotion: Selective reporting of study 329. *International Journal of Risk & Safety in Medicine*. 2008;20: 73-81. doi:10.3233/JRS-2008-0426
- 780 21. WHO Technical Consultation on Clinical Trials Registration Standards. Geneva: World Health organization. 25-27 April 2005; Available: [https://www.who.int/ictrp/news/ictrp\\_meeting\\_april2005\\_conclusions.pdf](https://www.who.int/ictrp/news/ictrp_meeting_april2005_conclusions.pdf)
- 783
- 786
- 789
- 792
- 795



- 798
22. ICTRP Search Portal [Internet]. [cited 21 Mar 2020]. Available:  
http://apps.who.int/trialsearch/
- 801
23. WHO | The WHO Registry Network [Internet]. [cited 1 Oct 2020]. Available:  
https://www.who.int/ictrp/network/en/
- 804
24. WHO | Partner Registries [Internet]. [cited 1 Oct 2020]. Available:  
https://www.who.int/ictrp/network/partner/en/
- 807
25. International Standards for Clinical Trial Registries – Version 3.0. Geneva: World  
Health Organization; 2018. License: CC BY-NC-SA 3.0 IGO
- 810
26. The-Clinical-Trial-Registry-of-the-Future-Proposal.pdf [Internet]. [cited 2020 Mar  
22]. Available from: http://www.transceleratebiopharmainc.com/wp-  
content/uploads/2017/11/The-Clinical-Trial-Registry-of-the-Future-Proposal.pdf
- 813
27. WHO ICTRP Registry Network Meeting Summary Report. Geneva: World Health  
Organization; 2015. Available:  
[https://www.who.int/ictrp/news/ICTRP\\_registry\\_network\\_meeting\\_report\\_2015\\_web  
.pdf?ua=1](https://www.who.int/ictrp/news/ICTRP_registry_network_meeting_report_2015_web.pdf?ua=1)
- 816
28. Moja LP, Moschetti I, Nurbhai M, Compagnoni A, Liberati A, Grimshaw JM, Chan  
AW, Dickersin K, Krleza-Jeric K, Moher D, Sim I, Volmink J. Compliance of clinical  
819 trial registries with the World Health Organization minimum data set: a survey. *Trials*.  
2009 Jul 22;10:56. doi: 10.1186/1745-6215-10-56. PMID: 19624821; PMCID:  
PMC2734552.
- 822
29. Ogino D, Takahashi K, Sato H. Characteristics of clinical trial websites: information  
distribution between ClinicalTrials.gov and 13 primary registries in the WHO registry  
825 network. *Trials*. 2014 Nov 5;15:428. doi: 10.1186/1745-6215-15-428. PMID:  
25373358; PMCID: PMC4234832.
- 828
30. Miller JE, Wilenzick M, Ritcey N, Ross JS, Mello MM. Measuring clinical trial  
transparency: an empirical analysis of newly approved drugs and large pharmaceutical  
831 companies. *BMJ Open*. 2017 Dec 5;7(12):e017917. doi: 10.1136/bmjopen-2017-  
017917. PMID: 29208616; PMCID: PMC5728266.
- 834
31. Goldacre B. How to get all trials reported: audit, better data, and individual  
accountability. *PLoS Med*. 2015 Apr 14;12(4):e1001821. doi:  
10.1371/journal.pmed.1001821. PMID: 25874719; PMCID: PMC4396123.
- 837
32. Our scoring method. [Internet]. [cited 21 Mar 2020]. Available:  
<http://policyaudit.alltrials.net/our-scoring-method/>
- 840
33. Goldacre B, Gray J. OpenTrials: towards a collaborative open database of all  
available information on all clinical trials. *Trials*. 2016 Apr 8;17:164. doi:  
843 10.1186/s13063-016-1290-8. PMID: 27056367; PMCID: PMC4825083.
- 846
34. Azar M, Riehm KE, Saadat N, Sanchez T, Chiovitti M, Qi L, Rice DB, Levis B,  
Fedoruk C, Levis AW, Kloda LA, Kimmelman J, Benedetti A, Thombs BD.  
Evaluation of Journal Registration Policies and Prospective Registration of  
Randomized Clinical Trials of Nonregulated Health Care Interventions. *JAMA Intern*

- 849 Med. 2019 May 1;179(5):624-632. doi: 10.1001/jamainternmed.2018.8009. PMID:  
30855655; PMCID: PMC6503638.
- 852 35. Miller J, Ross JS, Wilenzick M, Mello MM. Sharing of clinical trial data and results  
reporting practices among large pharmaceutical companies: cross sectional descriptive  
study and pilot of a tool to improve company practices. *BMJ*. 2019 Jul 10;366:l4217.  
855 doi: 10.1136/bmj.l4217. PMID: 31292127; PMCID: PMC6614834.
- 858 36. Jones CW, Safferman MR, Adams AC, Platts-Mills TF. Discrepancies between  
ClinicalTrials.gov recruitment status and actual trial status: a cross-sectional analysis.  
*BMJ Open*. 2017 Oct 11;7(10):e017719. doi: 10.1136/bmjopen-2017-017719. PMID:  
29025842; PMCID: PMC5652524.
- 861 37. Chan AW, Song F, Vickers A, Jefferson T, Dickersin K, Gøtzsche PC, Krumholz  
864 HM, Ghersi D, van der Worp HB. Increasing value and reducing waste: addressing  
inaccessible research. *Lancet*. 2014 Jan 18;383(9913):257-66. doi: 10.1016/S0140-  
6736(13)62296-5. Epub 2014 Jan 8. PMID: 24411650; PMCID: PMC4533904.
- 867 38. Tharyan P. Ethics committees and clinical trials registration in India: opportunities,  
obligations, challenges and solutions. *Indian J Med Ethics*. 2007 Oct-Dec;4(4):168-9.  
doi: 10.20529/IJME.2007.066. PMID: 18630235.
- 870 39. Pandey A, Aggarwal A, Seth S, Maulik M, Bano R, Juneja A. Clinical Trials  
Registry--India: redefining the conduct of clinical trials. *Indian J Cancer*. 2008 Jul-  
873 Sep;45(3):79-82. doi: 10.4103/0019-509x.44060. PMID: 19018108.
- 876 40. Krleza-Jerić K. Clinical trial registration: the differing views of industry, the WHO,  
and the Ottawa Group. *PLoS Med*. 2005 Nov;2(11):e378. doi:  
10.1371/journal.pmed.0020378. Epub 2005 Oct 18. PMID: 16221000; PMCID:  
PMC1255765.
- 879 41. WHO | WHO Data Set. In: WHO [Internet]. [cited 16 May 2019]. Available:  
<http://www.who.int/ictrp/network/trds/en/>
- 882 42. Potthast R, Vervölgyi V, McGauran N, Kerekes MF, Wieseler B, Kaiser T. Impact of  
inclusion of industry trial results registries as an information source for systematic  
885 reviews. *PLoS One*. 2014 Apr 17;9(4):e92067. doi: 10.1371/journal.pone.0092067.  
PMID: 24743113; PMCID: PMC3990559.
- 888 43. Harriman SL, Patel J. When are clinical trials registered? An analysis of prospective  
versus retrospective registration. *Trials*. 2016 Apr 15;17:187. doi: 10.1186/s13063-  
016-1310-8. PMID: 27079379; PMCID: PMC4832501.
- 891 44. Committee on Clinical Trial Registries; Board on Health Sciences Policy; Institute of  
Medicine. *Developing a National Registry of Pharmacologic and Biologic Clinical  
894 Trials: Workshop Report*. Washington (DC): National Academies Press (US); 2006.  
PMID: 26740992.
- 897 45. Williams RJ, Tse T, DiPiazza K, Zarin DA. Terminated Trials in the  
ClinicalTrials.gov Results Database: Evaluation of Availability of Primary Outcome  
Data and Reasons for Termination. *PLoS One*. 2015 May 26;10(5):e0127242. doi:  
900 10.1371/journal.pone.0127242. PMID: 26011295; PMCID: PMC4444136.

- 903 46. Metathesaurus. [cited 22 Mar 2020]. Available:  
[https://www.nlm.nih.gov/research/umls/knowledge\\_sources/metathesaurus/index.html](https://www.nlm.nih.gov/research/umls/knowledge_sources/metathesaurus/index.html)
- 906 47. Council Post: Why An SSL Certificate Is Important For Your Company Website.  
[Internet]. [cited 25 Sep 2020]. Available:  
<https://www.forbes.com/sites/forbestechcouncil/2018/05/18/why-an-ssl-certificate-is-important-for-your-company-website/#2181c3fb1dc3>
- 909 48. Yadav P, Jaykaran, Chaudhari M, Saxena D, Kantharia ND. Clinical trials registered  
in clinical trial registry of India: A survey. *J Pharmacol Pharmacother*. 2011  
912 Oct;2(4):289-92. doi: 10.4103/0976-500X.85953. PMID: 22025862; PMCID:  
PMC3198529.
- 915 49. ANZCTR [Internet]. [cited 25 Sep 2020]. Available:  
<https://www.anzctr.org.au/crawl.aspx>
- 918 50. Oxford recruits 2,700 virus patients for fast-growing drugs trial. *Financial Times*.  
[cited 25 Sep 2020]. Available: <https://www.ft.com/content/f4e3055e-72e2-459d-ba66-05af7d2c8915>
- 921 51. Clinical trials for a Covid-19 vaccine to begin in Rochester. WHAM. [cited 25 Sep  
2020]. Available: <https://13wham.com/news/local/clinical-trials-for-a-covid-19-vaccine-to-begin-in-rochester>
- 924 52. COVID-19: Hundreds Of Clinical Trials Under Way In India, Many Lack Rigour, Say  
Experts. [cited 25 Sep 2020]. Available: <https://www.indiaspend.com/covid-19-hundreds-of-clinical-trials-under-way-in-india-many-lack-rigour-say-experts/>
- 927 53. Krleza-Jerić K, Chan AW, Dickersin K, Sim I, Grimshaw J, Gluud C. Principles for  
international registration of protocol information and results from human trials of  
930 health related interventions: Ottawa statement (part 1). *BMJ*. 2005 Apr  
23;330(7497):956-8. doi: 10.1136/bmj.330.7497.956. Erratum in: *BMJ*. 2005 May  
28;330(7502):1258. PMID: 15845980; PMCID: PMC556346.
- 933 54. AllTrials. All Trials Registered. All Results Reported. In: AllTrials [Internet]. [cited  
16 May 2019]. Available: <http://www.alltrials.net/>
- 936 55. Miller JE, Korn D, Ross JS. Clinical trial registration, reporting, publication and  
FDAAA compliance: a cross-sectional analysis and ranking of new drugs approved  
939 by the FDA in 2012. *BMJ Open*. 2015 Nov 12;5(11):e009758. doi: 10.1136/bmjopen-2015-009758. PMID: 26563214; PMCID: PMC4654354.
- 942 56. ICMJE | Recommendations | Clinical Trials. [cited 10 Jun 2019]. Available:  
<http://www.icmje.org/recommendations/browse/publishing-and-editorial-issues/clinical-trial-registration.html>
- 945 57. Zarin DA, Tse T, Williams RJ, Rajakannan T. Update on Trial Registration 11 Years  
after the ICMJE Policy Was Established. *N Engl J Med*. 2017 Jan 26;376(4):383-391.  
doi: 10.1056/NEJMs1601330. PMID: 28121511; PMCID: PMC5813248.
- 948 58. Clinical trials policy – Grant funding | Wellcome. [cited 30 Sep 2020]. Available:  
<https://wellcome.org/grant-funding/guidance/clinical-trials-policy>

59. Publishing Policies | Gates Open Research. [cited 30 Sep 2020]. Available: <https://gatesopenresearch.org/about/policies#trialreg>

951 60. FDAAA 801 and the Final Rule - ClinicalTrials.gov. [cited 25 Sep 2020]. Available: <https://clinicaltrials.gov/ct2/manage-recs/fdaaa>

## 954 **Supporting information**

**S1 Table. Mapping to ISCTR.** The ~~17-14~~ features analyzed in this study map to the following nine sections of ISCTR: (i) Content, (ii) Quality and Validity, (iii) Accessibility, (iv) Unambiguous Identification, (v) Technical Capacity, (vi) Administration and Governance, (vii) The 24-field TRDS, (viii) Partner Registries, and (ix) Data Interchange Standards.

**S2 Table. Data on six aspects of each registry.** (a) ~~Time taken to obtain the results of a search,~~ (b) Total number of trials in the registry, (e**b**) Existence of a basic search function, (c**e** and d**e**) Advanced search function – TRDS fields and Extra fields, and (e**f**) Data download options.

**S3 Table. The list of the TRDS fields that are present in the Brief view and the Detailed view.** The presence or absence of the field is indicated by a 1 or 0, respectively. The number of the sample trial used for each registry is also provided.

**S4 Table. For each registry, a listing of the Extra fields in the Brief and Detailed views.**

**S5 Table. Data on multiple aspects of each registry.** (a) whether the PI name is compulsory; (b) reason for the termination of a trial, and whether there is a drop-down menu of reasons; (c) audit trail; (d) health condition (e) SSL certificate, and (f) documentation.

Dear Editor,

Please find below out itemized responses to the reviewers' comments. We trust that they are satisfactory.

Sincerely,  
Gayatri Saberwal

## **Response to Reviewers**

**REVIEWER #1:** Overall this is a useful and very timely piece of work which, as the authors say, could trigger further work on registry assessment and a wider debate on how trial registries can both improve the features they offer and become more consistent. In general it is well written and well referenced, and is supported by a comprehensive set of detailed data as supplementary files. The authors acknowledge the limitations of their study and include a useful set of suggestions for an 'ideal registry' as an aspiration to work towards.

I have some reservations about some aspects of the paper, however, which I think detract from its overall quality – but which I hope can be easily rectified:

**Authors: We thank the reviewer for the appreciative comments.**

-----  
1) I found the organisation of some of the material confused. In particular the very short methods section provides little detail about the 17 features selected as the basis of assessment, how and why they were selected, and by whom, and how decisions on weighting were made, and why 3 were not assessed. Later on, in table 2b and as a large part of the 'Discussion of specific features...' in Box 1, much of this material is covered, but I think it would have been simpler and more logical to bring these explanations together as part of an expanded methods section. Box 1 is embedded in the discussion but its content seems largely a justification of the scorecard's construction. The result is that the reader has to work harder than they should to understand how and why the scoring system was constructed.

**Authors: We have reorganized the Methods section, and added further details. This includes portions from Box 1. We have also moved Table 2b to the methods section (where it is now Table 1) to make the rationale of the scorecard available upfront. Additionally, we wish to highlight that lines 128–130 describe how the authors selected the criteria for the scorecard, based on a review of the literature, but mainly focussing on the ISCTR guidelines.**

-----  
2) Similarly I think the results section could be better organised. Why not simply go through the results for each of the 14 areas assessed, noting at that point the median and the range of scores, techniques and difficulties in assessment, and possible caveats around the scores obtained? The current section provides useful tables and a brief summary, but much of the text is simply restating what was assessed. Would a simple pie chart be a useful way of summarising the total numbers data in table 1, to show the proportion of total registry entries included in each?

**Authors: We have rewritten and reorganized the Results and Discussion. We have created the suggested pie chart, and have also presented other data from the erstwhile Table 1 as a figure.**

-----  
3) A minor point, but there 10 superscript references in Table 1, presumably to some explanatory notes about the data point presented, but I could not find any explanation for them, either in the main text or the supplementary material. They should either be removed or (better) the explanatory notes should be provided.

**Authors: These notes were inadvertently left out due to the complications of submitting large tables in a particular format. They are visible in the revised Table.**

-----  
4) I thought the discussion was a little timid. The work was done in early 2020, in the context of a pandemic that has dramatically underscored the need for good quality, consistent and easily available information from trial registries, partly to be able to track the numbers, types and results of trials relating to COVID-19, partly because public health decisions require a network of data sources at a global level and registries should be a key part of this. That point might have been worth including – improving trial registry systems has become more urgent!

**Authors: We have rewritten the discussion, which include the following lines.**

**“The ongoing Covid-19 pandemic has forcefully brought home the need for high quality trial registries with information that is consistent, comprehensive and available in a user-friendly fashion. Billions of people need to be immediately protected from the virus, and large numbers of drugs and vaccines are in trials. There is world-wide interest in these trials, and information that is being tracked includes what is being trialled; where are these trials taking place; and what are the results of these trials? Each country needs to take public health decisions, which will evolve as trials running in different parts of the world yield results. Public trial registries are one of the fastest ways of communicating these results.**

**Further, the publicly available, freely accessible information in trial registries helps to build trust with the public [26,44]. Covid-19 trials have been among the fastest recruiting trials in history [50,51], and it is possible that the publicly available information in trial registries has helped many of the potential trial participants decide to enrol.**

**It is not just that everyone is interested in the positive outcomes of trials. For example, an inspection of the CTRI records of hundreds of covid-19 trials being run in India has thrown up quality issues in almost all of them. Based on negative publicity, the government has taken action in some cases [52].”**

-----  
5) Similarly, although there is a general sentiment expressed that registries should improve, there were no concrete suggestions as to how this might be achieved or who needs to be involved, e.g. by greater collaboration between registries, perhaps orchestrated by the WHO, or by using the influence of funders and publishers to re-iterate the need for greater consistency. Are some of the aspects that were assessed easier to improve than others? If so how could they be progressed? Should there be a web page with a regularly updated 'score card' for the trial registries? I appreciate this was an initial survey but I think it might have been useful to venture, if only briefly, into this area in the discussion.

**Authors: We have added the following lines to the Results and Discussion:**

**There is a long history of various stakeholders arguing for the need to improve registries and the quality of trial registration. Examples include academics and health activists [53–55], journals (ICMJE) [56], WHO [41], registry managers [57], funders [58,59] and governments [60]. Each of these efforts has led to some improvements in the number and quality of trial records hosted by registries. However none of them has led to a perfect set of records. It is likely that the only way this will be achieved is if all stakeholders continue to apply pressure on the registries. Studies such as this one help to highlight deficiencies, which adds to the other efforts aimed at improving registries. Further, the authors would welcome other researchers’ efforts to create and update a website that lists the scorecard, with periodic updates. Should such a website not be created by any other group, the authors intend to re-evaluate the registries’ performance on the scorecard every few years.**

-----  
6) Another issue largely missing from the discussion: the authors mention that registries have many different types of users – researchers, clinicians, members of the public, data scientists, etc. I wonder if this should therefore lead to different scoring systems – perhaps with different weightings and / or items – for each of those major user groups. Those could provide additional insight into the strengths and weakness of different repositories, and thus more clearly identify areas of improvement, but could also be consolidated into an overall score if desired. For example, although the authors state their assumption is that most users would not have the technical expertise to use APIs, and / or scraping and crawling systems to retrieve data, the integration of trial registries with other data systems, and thus the ability to support bulk download by machines, is becoming increasingly important. I would have liked to have seen this aspect more explicitly included in any 'to do list' of possible future assessments, along with considerations of data quality, completeness, and the support for reporting results

**Authors: In the Discussion, while enumerating the various kinds of users of registry data, we have stated that “Other categories of users, such as medical professionals, patients, trial sponsors, policy makers, data scientists and so on, may wish to alter the assessed features, or the scoring, in order to rank the registries according to their priorities. For instance, a data scientist would be very appreciative of ANZCTR, which specifically enables web crawling of its records [49]. Furthermore, the managers of other registries, either public or private, and either based on the data in the PR+ or not, may be interested in the results of this study.”. We do not feel confident of creating different scoring systems. Ideally, this should be done by polling at least a few individuals in each category of users, and we would find it extremely challenging to do this in India. As such, any additional scoring system that we developed would be based on unvalidated assumptions, and would be unconvincing, even to us.**

-----  
7) There is a minor but distracting typo in the first paragraph of the Results section (5,72,901)  
**Authors: We had used the Indian system. We have corrected this to 572,901.**

-----  
Having listed all of the points above I would re-iterate that overall I think the paper is useful and should be published. The points are offered as suggestions for possible improvement.

#### **REVIEWER #2:**

The concept is interesting but needs to be re-written.

1. The paper should first start with a good explanation of the origins of the ISCTR. For example, "following the Ministerial Summit on Health Research that took place in Mexico City, Mexico, in November 2004, participants called for the WHO to facilitate the establishment of: "a network of international clinical trials registers to ensure a single point of access and the unambiguous identification of trials".

**Authors: We have rewritten the Introduction to include these events and further details of the ICTRP.**

- 
2. <https://www.who.int/ictrp/about/en/> The authors need to be more complete in explaining the WHO registry network including primary vs partner registries as well as data providers; the differences of each. Then as it relates to registries what kind of papers have been published; findings; some of this is introduced at a high level in the discussion section which belongs in the introduction.

**Authors: We have include these points in the Introduction.**

-----  
3. The authors are not clear in their terminology (for example, versions vs features). There is reference to WHO's 24-field Trial Registration Data Set vs 17 features vs 14 features selected by the authors; there is reference to the 9 standards; hence it is not clear how these "concepts" inter-relate (24 vs 17 vs 9; data set vs standards) and why the authors selected 14 features (which is perhaps more attributes than features).

**Authors: We have now ensured the following:**

**(a) the word 'section' only refers to one or more of the nine sections of the ISCTR;**

**(b) the word 'feature' only refers to one or more of the 14 features of each registry that are the focus of this study;**

**(c) since the different registries may have different variants of each 'feature', we use the word 'variation' in this context.**

**We have also included this list as a Box within Methods so that readers have no confusion regarding the terminology used.**

-----  
4. How does WHO refer to author defined "features".

**Authors: As described in Methods, the 'features' defined in this study have been compiled by the authors from different sources, including ISCTR. Therefore ISCTR discusses some, but not all, of these features directly. However, each feature maps to one or more standards set forth in ISCTR.**

-----  
5. The score card is hard to follow; the scoring is not understandable (for example, "for features with multiple variants, the score ranges from 1 to 5" is not clear and then how scores were calculated: as in the case of chCTR for advanced search fields TRDS a score of 17 was assigned).

**Authors: We have reorganized the Methods section, and added further details. This includes portions from Box 1. We have also moved Table 2b to the methods section (where it is now Table 1) to make the rationale of the scorecard available upfront. Further, we have rewritten the Results and Discussion to include a more detailed analysis of the findings. We hope this alleviates the confusion around the scorecard.**

-----  
6. The meaning of the scorecard is not clear; the interpretation of the findings are inconsistent and leaves the reader bewildered.

**Authors: We regret that the first version of the manuscript was so confusing. Please refer to our response to the comment before this (Comment 5).**

-----  
7. Please see specific comments in the attached word document.

**Authors: Please find below a response to each of the comments in the manuscript file, which we have numbered from 7.1 to 7.44). In each case we have referenced the line in the original pdf, where the reviewer's comment has been taken from.**

-----  
7.1 Perhaps to elaborate on the 14 features briefly: what do they cover off on. (Line 31)

**Authors: This has been done. [Lines 32–35, and 41–44 of the revised manuscript]**

-----



7.2 Would not include limitations here. Only in the body of the paper under the proper section. (Line 42)

**Authors: This has been done.**

-----  
7.3 New information should not be introduced in the conclusion; rather include in the results section. (Line 51)

**Authors: This has been done. [Lines 587–589 of the revised manuscript]**

-----  
7.4 such as? Elaborate (Line 53)

**Authors: This has been done. [Lines 63–68 of the revised manuscript]**

-----  
7.5 elaborate on types of comments and analyses. (Line 67)

**Authors: This has been done. [Lines 72–76 of the revised manuscript]**

-----  
7.6 awkwardly written. "Set up to facilitate"? The ICTRP was designed to help facilitate. (Line 68)

**Authors: This has been reworded. [Lines 81–85 of the revised manuscript]**

-----  
7.7 replace wording with "not an ICTRP recognized registry"... (Line 71)

**Authors: This has been reworded. [Lines 85–88 of the revised manuscript]**

-----  
7.8 why were the other partner registries not included? or at least some of the other partner registries? (Line 74)

**Authors: We have not included \*any\* partner registry in our analysis. This issue has been covered in more detailed now. [Lines 88–93 of the revised manuscript]**

-----  
7.9 Write as Primary Registries Plus (PR+) (Line 74)

**Authors: This has been done. [Lines 92–93 of the revised manuscript]**

-----  
7.10 Define the nine sections... (Line 77)

**Authors: This has been done. [Lines 97–100 of the revised manuscript]**

-----  
7.11 Recommend using 3rd person objective. Not "we" (Line 77)

**Authors: It would be extremely challenging to rewrite the Methodology in 3rd person. However, we have ascertained that 'we' is used in the Methods' section, in articles that have appeared in well-known journals including PLOS ONE such as:**

**<https://www.bmj.com/content/362/bmj.k3218>**

**<https://trialsjournal.biomedcentral.com/articles/10.1186/1745-6215-15-428>**

**<https://journals.plos.org/plosone/article?id=10.1371/journal.pone.0193088#sec006>**

**We hope that it is alright if we leave the construction as it is.**

-----  
7.12 not clear: using terms like versions, features, sections - difficult for the reader to follow (Line 83)

**Authors: We have addressed this in our response to this Reviewer's point 3.**

-----  
7.13 important to note that not all fields in clinicaltrial.gov are mandatory. is this the case in other registries as well? (Line 96)

**Authors: Yes, it is true that all fields are not mandatory in any registry. However we are only examining the \*presence\* of certain fields, not whether trialists have filled each of them.**

-----  
7.14 Authors? (Line 98)

**Authors: We have rewritten this sentence and it now reads, 'All analyses were performed by one author (NV) and verified by the other (GS).'**

-----  
7.15 Is this part of Methods (Line 102)

**Authors: We have formatted the manuscript to more clearly demarcate the different levels of headings.**

-----  
7.16 needs to be defined "multiple variants, score ranges" (Line 106)

**Authors: We have defined the variants and the score ranges in Table 1.**

-----  
7.17 difficult to follow; confusing (Line 107)

**Authors: We have moved Table 2b to the methods section (where it is now Table 1) to make the rationale of the scorecard available upfront. We have also illustrated our scoring system with examples early in the Methods section. Additionally, we wish to highlight that lines 128–130 describe how the authors selected the criteria for the scorecard, based on literature review but mainly focussing on the ISCTR guidelines.**

-----  
7.18 perhaps to refer to as "attributes"? (Line 117)

**Authors: We have determined that 'feature' and 'attribute' are synonyms. Since we have used 'features' throughout the manuscript, we preferred to stick to it. Also, as detailed in our response to the comment 7.12, above, we have rationalized our use of the word 'features' so that there is no confusion over its usage.**

-----  
7.19 why 14 of the 17? (Line 118)

**Authors: While revising the manuscript, we have removed the three features that were not assessed quantitatively. This leaves 14 features, all of which are in the scorecard. We believe that these changes have removed room for confusion on this point, and improved the readability of the paper.**

-----  
7.20 we went from 14 of 17 to 24. Not sure how this ties back to the 9 standards introduced under Methods (Line 120)

**Authors: As mentioned in point 7.19, above, we have removed the three features that were assessed quantitatively, and the final number is 14.**

**Regarding the number 24: As described in the manuscript, one of the 14 features is the WHO's Trial Registration Data Set, or TRDS, which in turn is composed of 24 distinct fields (as defined by ISCTR).**

-----  
7.21 weight not weightage (Line 123)

**Authors: This has been rewritten. [Lines 229–233 of the revised manuscript]**

-----  
7.22 why is this a feature of the "registry" vs what is required by government in the local country. (Line 133)

**Authors: In order to avoid possible confusion, we have rephrased the sentence to: “As a first step, it is important to know how many records the database holds. This number should be readily available, and we have therefore analysed the ease of accessing it.”**

-----  
7.23 why were these two subjects highlighted especially as they were not noteworthy or substantive. (Line 136)

**Authors: We have deleted these two features now.**

-----  
7.24 is this a server issue; connectivity; (Line 140)

**Authors: We do not know the reason for the lag in loading RPCEC results. It seems to be at the RPCEC end, since other registries gave us no problem. In any case, we have deleted the entire feature now.**

-----  
7.25 would think this is an important aspect to score; the logic to not score this as half of the registries did not contain is a shortcoming of the analysis as registries that do not have this attribute should receive a lower rating. Completion of variables is less about the registry vs the owner of the "data" (sponsor). (Line 140)

**Authors: We have now included in the Results and Discussion our analysis of whether the registry provides the reason for trial termination. However, the information pertaining to this feature is already present in the Extra fields. Hence we have not scored this features separately, since that would result in it being double counted.**

-----  
7.26 why these attributes? Why is SSL important? (Line 154)

**Authors: We have now included a more detailed description of why SSL is important and why we have included this feature. [Lines 471–481 of the revised manuscript]**

-----  
7.27 this is the sponsor's responsibility: QC (Line 166)

**Authors: In the Results and Discussion section we have now described why even though QC is the sponsor’s responsibility it does not always do this, and how it is the duty of the registry to facilitate higher quality registrations. [Lines 496–501 of the revised manuscript]**

-----  
7.28 these points should have been provided in the introduction. (Line 181)

**Authors: We have now included these points in the Introduction.**

-----  
7.29 there is no enough discussion on what has been done, why there is a gap and how this fills the gap in a meaningful way. (Line 189)

**Authors: We have rewritten the Introduction and have discussed the work done so far, and how our study fills a lacuna in the analysis and reporting of registries' performance.**

-----  
7.30 why is this ideal? (Line 195)

**Authors: As described in the manuscript, we propose an 'interim ideal' registry based on the features that we have assessed. That it is a limited goal on the way to achieving everything that ISCTR requires. And it is the 'ideal' from amongst the various options that one or more of the registries are already using.**

-----  
7.31 seems per line 180 to 189 there have been other studies. not clear. (Line 215)

**Authors: We believe that the revised manuscript addresses this concern.**

-----  
7.32 how was this impartial? (Line 216)

**Authors: Primarily based on the recommendations of ISCTR, we determined which features of the registries to assess. All scoring rationales were also based on the minimum standards outlined in the ISCTR, and recommendations from earlier studies in our literature survey. We believe that our scoring is impartial since this protocol rules out scoring that may be biased in favour of, or against, any particular registry.**

-----  
7.33 over reach as this is a subjective statement; only state represents the authors' perspective not that of others. (Line 220)

**Authors: We have changed this sentence, which now reads "The scorecard above analyses features that are of interest to the authors and, by extension, possibly to other researchers concerned with the health of the trial ecosystem overall."**

-----  
7.34 not clear (Line 222)

**Authors: We have rephrased this to the following: "Other categories of users, such as medical professionals, patients, trial sponsors, policy makers, data scientists and so on, may wish to alter the assessed features, or the scoring, in order to rank the registries according to their priorities."**

-----  
7.35 registries cannot be interested in something; only those who work on registries (Line 224)

**Authors: We have rephrased the sentence to the following: "Further, the managers of other registries, either public or private, and either based on the data in the PR+ or not, may be interested in the results of this analysis."**

-----  
7.36 less about the registry and more about how users utilize unless all fields are required by the registry. (Line 230)

**Authors: We are not sure that we have understood this question. It is true that in no registry are all fields mandatory. Thus it would not be advisable to evaluate the quality of registration, and of information in a particular field, by comparisons across registries. However, as we have described in our response to Reviewer comment 7.13, we are only examining the *presence* of certain fields, not whether trialists have filled each of them.**

-----

7.37 need to write using English proper language fit for scientific publication (Line 238)

**Authors: We have rephrased the sentence to the following: “As noted above, 41% of the records are held in the other PR+, and they need to be examined as well.”**

-----  
7.38 Define (Page 19, Box 1)

**Authors: We have described our assessment of this feature in greater detail in the revised manuscript.**

-----  
7.39 more importantly why do registries include something not recommended by ISCTR? (Page 20, Box 1)

**Authors: We have added the following lines to the manuscript: “There may be a range of reasons for including these Extra fields. For instance, India had been criticized for the lack of appropriate oversight to ensure the ethical conduct of trials, and therefor CTRI asked trialists for details of the ethics committee even before ISCTR required this information [38,39]. Also, there have been demands from the Cochrane collaboration, and many other individuals and groups, to include several additional items in the ISCTR list, which WHO has not agreed to. It is alleged that the recommended list is closer to what industry demanded [40]. As such, although ISCTR may not list every field that many people believed to be essential, managers of particular registries may have chosen to list some of them.”**

-----  
7.40 Restructure: what does WHO require; what do registries do; where is the difference and impact on value of registries. (Page 20, Box1)

**Authors: In each section of the Results and Discussion, we provide an introductory line, then the results, then the discussion. We have done this, incorporating the Reviewer’s points in this section.**

-----  
7.41 is this an author term? It is a prospective trial even if data is only entered after the study starts. (Page 21, Box1)

**Authors: ‘Retrospective trials’ is used by other researchers – it is not our term. Nevertheless, earlier in the manuscript, we have added an explanatory line “Trials may be registered either prospectively or retrospectively, that is before the enrolment of the first participant or after.” Also, in order to avoid ambiguity, we have rephrased this sentence as follows: “Further, flagging retrospectively registered ones may shame the registrants into registering prospectively in future”.**

-----  
7.42 what were the findings? (Page 21, Box1)

**Authors: We have revised the text to include the findings of the analysis.**

-----  
7.43 how was 3 assigned out of 5: what does a value of 1 or 2 or 3 or 4 or 5 represent? (Page 8, Table 2a)

**Authors: As explained in the response to the Reviewer’s comment 5, we have moved Table 2b to the methods section (where it is now Table 1) to make the rationale of the scorecard available upfront. We hope this will alleviate the confusion regarding scoring.**

-----  
7.44 11? 17? thought scores were 1 to 5. (Page 8, Table 2a)

**Authors: Please refer our response to the previous point (Reviewer's comment 7.43)**

-----

8. The topic is interesting but the paper needs to be rewritten and the concept of a scorecard has to be rethought to ensure it has logical relevance to the reader, that the scoring is understandable and can be interpreted thereby leading to actionable insights.

**Authors: We have rewritten and reorganized the manuscript, and we hope that these changes address the reviewer's concerns.**

-----

9. The paper has to be placed in context of other relevant studies completed to date.

**Authors: We have rewritten the Introduction to address this concern.**
